# Supplementary material
Source: PubMed Central journal article supplement (PMC8014956)
Supplement: NIHMS1684502-supplement-Supplementary_appendices.pdf [file NIHMS1684502-supplement-Supplementary_appendices.pdf]

## Supplementary appendices

### Single or multiple strain probiotics for prevention of mortality and morbidity in preterm infants: a systematic review and network meta-analysis of randomized trials

Rebecca L. Morgan, Geoff A. Preidis, Purna C. Kashyap, Adam V. Weizman, Behnam Sadeghirad, McMaster Probiotic, Prebiotic, and Synbiotic Work Group (\*Names and affiliations in appendix)

#### Online Supplementary Contents

|                                                                                                                                                                                    |    |
|------------------------------------------------------------------------------------------------------------------------------------------------------------------------------------|----|
| Appendix 1: Search strategies .....                                                                                                                                                | 3  |
| Appendix 2: References to trials included in the network meta-analysis .....                                                                                                       | 6  |
| Appendix 3: Characteristics of participants of trials included in the network meta-analysis.....                                                                                   | 10 |
| Appendix 4: Treatment characteristics of trials and outcomes included in the network meta-analysis .....                                                                           | 13 |
| Appendix 5: Networks of treatment comparisons .....                                                                                                                                | 19 |
| E-FIGURE 1: NETWORK OF ELIGIBLE COMPARISONS FOR ALL-CAUSE MORTALITY.....                                                                                                           | 19 |
| E-FIGURE 2: NETWORK OF ELIGIBLE COMPARISONS FOR SEVERE NEC.....                                                                                                                    | 20 |
| E-FIGURE 3: NETWORK OF ELIGIBLE COMPARISONS FOR LATE-ONSET SEPSIS .....                                                                                                            | 21 |
| E-FIGURE 4: NETWORK OF ELIGIBLE COMPARISONS FOR DURATION OF TIME TO REACH FULL ENTERAL FEEDING .....                                                                               | 22 |
| E-FIGURE 5: NETWORK OF ELIGIBLE COMPARISONS FOR HOSPITAL STAY .....                                                                                                                | 23 |
| Appendix 6: Summary of risk of bias assessments for included trials .....                                                                                                          | 24 |
| Appendix 7: Results of the direct pairwise comparisons and GRADE assessments for all outcomes .....                                                                                | 27 |
| E-TABLE 1: RESULTS OF DIRECT PAIRWISE COMPARISONS WITH NUMBER TRIALS AND EVENTS FOR EACH TRIAL ARM AND CERTAINTY OF EVIDENCE (CoE) FOR ALL-CAUSE MORTALITY .....                   | 27 |
| E-TABLE 2: RESULTS OF DIRECT PAIRWISE COMPARISONS WITH NUMBER TRIALS AND EVENTS FOR EACH TRIAL ARM AND CERTAINTY OF EVIDENCE (CoE) FOR SEVERE NEC .....                            | 29 |
| E-TABLE 3: RESULTS OF DIRECT PAIRWISE COMPARISONS WITH NUMBER TRIALS AND EVENTS FOR EACH TRIAL ARM AND CERTAINTY OF EVIDENCE (CoE) FOR CULTURE PROVEN SEPSIS.....                  | 31 |
| E-TABLE 4: RESULTS OF DIRECT PAIRWISE COMPARISONS WITH NUMBER TRIALS AND EVENTS FOR EACH TRIAL ARM AND CERTAINTY OF EVIDENCE (CoE) FEED INTOLERANCE .....                          | 33 |
| E-TABLE 5: RESULTS OF DIRECT PAIRWISE COMPARISONS WITH NUMBER TRIALS AND EVENTS FOR EACH TRIAL ARM AND CERTAINTY OF EVIDENCE (CoE) FOR TIME TO REACH FULL ENTERAL FEED (DAYS)..... | 34 |
| E-TABLE 6: RESULTS OF DIRECT PAIRWISE COMPARISONS WITH NUMBER TRIALS AND EVENTS FOR EACH TRIAL ARM AND CERTAINTY OF EVIDENCE (CoE) FOR DURATION OF HOSPITALIZATION .....           | 35 |
| Appendix 8: Network meta-analysis results (league tables).....                                                                                                                     | 36 |
| E-TABLE 7: NETWORK META-ANALYSIS RESULTS FOR ALL-CAUSE MORTALITY .....                                                                                                             | 36 |
| E-TABLE 8: NETWORK META-ANALYSIS RESULTS FOR SEVERE NEC.....                                                                                                                       | 37 |
| E-TABLE 9: NETWORK META-ANALYSIS RESULTS FOR LATE-ONSET SEPSIS .....                                                                                                               | 38 |
| E-TABLE 10: NETWORK META-ANALYSIS RESULTS FOR REDUCTION IN NUMBER OF DAYS TO REACH FULL ENTERAL FEEDING .....                                                                      | 39 |
| E-TABLE 11: NETWORK META-ANALYSIS RESULTS FOR DURATION OF HOSPITALIZATION (DAYS) .....                                                                                             | 40 |
| Appendix 9: Results from evaluating incoherence in loops of evidence .....                                                                                                         | 41 |

|                                                                                                                                                                                                                                                                          |    |
|--------------------------------------------------------------------------------------------------------------------------------------------------------------------------------------------------------------------------------------------------------------------------|----|
| E-FIGURE 6: INCOHERENCE PLOT FOR ALL-CAUSE MORTALITY.....                                                                                                                                                                                                                | 41 |
| E-FIGURE 7: INCOHERENCE PLOT FOR SEVERE NEC (BELL'S STAGE II OR MORE).....                                                                                                                                                                                               | 42 |
| E-FIGURE 8: INCOHERENCE PLOT FOR CULTURE PROVEN SEPSIS .....                                                                                                                                                                                                             | 43 |
| E-FIGURE 9: INCOHERENCE PLOT FOR TIME TO REACH FULL ENTERAL FEED (DAYS) .....                                                                                                                                                                                            | 44 |
| E-FIGURE 10: INCOHERENCE PLOT FOR DURATION OF HOSPITALIZATION (DAYS).....                                                                                                                                                                                                | 45 |
| Appendix 10: SUCRA and cumulative probability plots .....                                                                                                                                                                                                                | 46 |
| E-TABLE 12: THE SURFACE UNDER THE CUMULATIVE RANKING (SUCRA) VALUES AND MEAN RANKS FOR PRIMARY OUTCOMES .....                                                                                                                                                            | 46 |
| E-FIGURE 11: PLOTS OF THE SURFACE UNDER THE CUMULATIVE RANKING CURVES FOR ALL TREATMENTS FOR THE 'ALL-CAUSE MORTALITY' OUTCOME .....                                                                                                                                     | 47 |
| E-FIGURE 12: PLOTS OF THE SURFACE UNDER THE CUMULATIVE RANKING CURVES FOR ALL TREATMENTS FOR THE 'NEC STAGE II OR MORE' OUTCOME .....                                                                                                                                    | 48 |
| E-FIGURE 13: PLOTS OF THE SURFACE UNDER THE CUMULATIVE RANKING CURVES FOR ALL TREATMENTS FOR THE 'CULTURE PROVEN SEPSIS' OUTCOME .....                                                                                                                                   | 49 |
| E-FIGURE 14: PLOTS OF THE SURFACE UNDER THE CUMULATIVE RANKING CURVES FOR ALL TREATMENTS FOR THE 'TIME TO REACH FULL ENTERAL FEED' OUTCOME.....                                                                                                                          | 50 |
| E-FIGURE 15: PLOTS OF THE SURFACE UNDER THE CUMULATIVE RANKING CURVES FOR ALL TREATMENTS FOR THE 'DURATION OF HOSPITALIZATION' OUTCOME .....                                                                                                                             | 51 |
| Appendix 11: GRADE presentation of continuous outcomes .....                                                                                                                                                                                                             | 52 |
| NETWORK META-ANALYSIS RESULTS (MEAN DIFFERENCE [MD] AND 95% CIs) SORTED BASED ON GRADE CERTAINTY OF EVIDENCE (COE) FOR THE COMPARISONS OF ACTIVE TREATMENTS VS. PLACEBO (PLC) FOR TIME TO REACH FULL ENTERAL FEEDING (DAYS) AND DURATION OF HOSPITALIZATION (DAYS) ..... | 52 |

## Appendix 1: Search strategies

### MEDLINE – from 1946

| # ▲ | Searches                                                                                                     |
|-----|--------------------------------------------------------------------------------------------------------------|
| 1   | enterocolitis, necrotizing/                                                                                  |
| 2   | (necroti?ing enterocolitis or enterocolitis necroticans or nec or typhlitis or pneumatosis intestinalis).tw. |
| 3   | 1 or 2                                                                                                       |
| 4   | randomized controlled trial.pt.                                                                              |
| 5   | controlled clinical trial.pt.                                                                                |
| 6   | randomized.ab.                                                                                               |
| 7   | placebo.ab.                                                                                                  |
| 8   | drug therapy.fs.                                                                                             |
| 9   | randomly.ab.                                                                                                 |
| 10  | trial.ab.                                                                                                    |
| 11  | groups.ab.                                                                                                   |
| 12  | or/4-11                                                                                                      |
| 13  | exp animals/ not humans.sh.                                                                                  |
| 14  | 12 not 13                                                                                                    |
| 15  | 3 and 14                                                                                                     |

### Embase Classic and Embase – from 1947

| # ▲ | Searches                                                                                                                                                |
|-----|---------------------------------------------------------------------------------------------------------------------------------------------------------|
| 1   | enterocolitis, necrotizing/                                                                                                                             |
| 2   | (necroti?ing enterocolitis or enterocolitis necroticans or nec or typhlitis or pneumatosis intestinalis).tw.                                            |
| 3   | 1 or 2                                                                                                                                                  |
| 4   | crossover-procedure/                                                                                                                                    |
| 5   | double-blind procedure/                                                                                                                                 |
| 6   | randomized controlled trial/                                                                                                                            |
| 7   | single-blind procedure/                                                                                                                                 |
| 8   | ((doubl* adj blind*) or (singl* adj blind*) or allocat* or assign* or cross over* or crossover* or factorial* or placebo* or random* or volunteer*).tw. |
| 9   | or/4-8                                                                                                                                                  |
| 10  | exp Animals/ not humans/                                                                                                                                |
| 11  | 9 not 10                                                                                                                                                |
| 12  | 3 and 11                                                                                                                                                |

### Cochrane Central Register of Controlled Trials

| # ▲ | Searches                                                                                                     |
|-----|--------------------------------------------------------------------------------------------------------------|
| 1   | enterocolitis, necrotizing/                                                                                  |
| 2   | (necroti?ing enterocolitis or enterocolitis necroticans or nec or typhlitis or pneumatosis intestinalis).tw. |
| 3   | 1 or 2                                                                                                       |

**Science Citation Index Expanded (SCI-EXPANDED) – from 1900**  
**Social Sciences Citation Index (SSCI) – from 1956**

| Set |                                                                                                                                                                                                                    |
|-----|--------------------------------------------------------------------------------------------------------------------------------------------------------------------------------------------------------------------|
| # 5 | #3 NOT #4<br><i>Indexes=SCI-EXPANDED, SSCI Timespan=All years</i>                                                                                                                                                  |
| # 4 | TS=(rat or rats or mouse or mice or pig or pigs or piglet or piglets or porcine or animal)<br><i>Indexes=SCI-EXPANDED, SSCI Timespan=All years</i>                                                                 |
| # 3 | #2 AND #1<br><i>Indexes=SCI-EXPANDED, SSCI Timespan=All years</i>                                                                                                                                                  |
| # 2 | TS=((doubl* NEAR blind*) or (singl* NEAR blind*) or allocat* or assign* or "cross over*" or crossover* or factorial* or placebo* or random* or volunteer*)<br><i>Indexes=SCI-EXPANDED, SSCI Timespan=All years</i> |
| # 1 | TS=("necrotising enterocolitis" or "necrotizing enterocolitis" or "enterocolitis necroticans" or "nec" or "typhlitis" or "pneumatois intestinalis")<br><i>Indexes=SCI-EXPANDED, SSCI Timespan=All years</i>        |

**BIOSIS Previews 1980 to present (Oct 22, 2014)**

| Set |                                                                                                                                                                                                                 |
|-----|-----------------------------------------------------------------------------------------------------------------------------------------------------------------------------------------------------------------|
| # 5 | #3 NOT #4<br><i>Indexes=BIOSIS Previews Timespan=All years</i>                                                                                                                                                  |
| # 4 | TS=(rat or rats or mouse or mice or pig or pigs or piglet or piglets or porcine)<br><i>Indexes=BIOSIS Previews Timespan=All years</i>                                                                           |
| # 3 | #2 AND #1<br><i>Indexes=BIOSIS Previews Timespan=All years</i>                                                                                                                                                  |
| # 2 | TS=((doubl* NEAR blind*) or (singl* NEAR blind*) or allocat* or assign* or "cross over*" or crossover* or factorial* or placebo* or random* or volunteer*)<br><i>Indexes=BIOSIS Previews Timespan=All years</i> |
| # 1 | TS=("necrotising enterocolitis" or "necrotizing enterocolitis" or "enterocolitis necroticans" or "nec" or "typhlitis" or "pneumatois intestinalis")<br><i>Indexes=BIOSIS Previews Timespan=All years</i>        |

**CINAHL (EBSCOHost)**

| #   | Searches                                                                   |
|-----|----------------------------------------------------------------------------|
| S17 | S3 AND S16                                                                 |
| S16 | S4 OR S5 OR S6 OR S7 OR S8 OR S9 OR S10 OR S11 OR S12 OR S13 OR S14 OR S15 |
| S15 | TX allocat* random*                                                        |
| S14 | (MH "Quantitative Studies")                                                |
| S13 | (MH "Placebos")                                                            |
| S12 | (MH "Placebos")                                                            |
| S11 | TX placebo*                                                                |
| S10 | TX random* allocat*                                                        |
| S9  | (MH "Random Assignment")                                                   |
| S8  | TX randomi* control* trial*                                                |

|    |                                                                                                                                                                                                      |
|----|------------------------------------------------------------------------------------------------------------------------------------------------------------------------------------------------------|
| S7 | TX ( (singl* n1 blind*) or (singl* n1 mask*) ) or TX ( (doubl* n1 blind*) or (doubl* n1 mask*) ) or TX ( (tripl* n1 blind*) or (tripl* n1 mask*) ) or TX ( (trebl* n1 blind*) or (trebl* n1 mask*) ) |
| S6 | TX clinic* n1 trial*                                                                                                                                                                                 |
| S5 | PT Clinical trial                                                                                                                                                                                    |
| S4 | (MH "Clinical Trials+")                                                                                                                                                                              |
| S3 | S1 OR S2                                                                                                                                                                                             |
| S2 | TX ("necrotising enterocolitis" or "necrotizing enterocolitis" or "enterocolitis necroticans" or "nec" or "typhlitis" or "pneumatosis intestinalis")                                                 |
| S1 | (MH "Enterocolitis, Necrotizing")                                                                                                                                                                    |

### Scopus

(( TITLE-ABS-KEY ( "necrotising enterocolitis" OR "necrotizing enterocolitis" OR "enterocolitis necroticans" OR "nec" OR "typhlitis" OR "pneumatosis intestinalis" ) ) AND ( TITLE-ABS-KEY ( ( doubl\* W/1 blind\* ) OR ( singl\* W/1 blind\* ) OR allocat\* OR assign\* OR "cross over\*" OR crossover\* OR factorial\* OR placebo\* OR random\* OR volunteer\* ) ) ) AND NOT ( TITLE-ABS-KEY ( rat OR rats OR mouse OR mice OR pig OR pigs OR piglet OR piglets OR porcine OR animal ) ) )

### ProQuest Dissertations & Theses Full Text

(TI,AB,FT("necrotising enterocolitis" OR "necrotizing enterocolitis" OR "enterocolitis necroticans" OR "typhlitis" OR "pneumatosis intestinalis") AND TI,AB,FT((doubl\* NEAR/1 blind\*) OR (singl\* NEAR/1 blind\*) OR allocat\* OR assign\* OR "cross over\*" OR crossover\* OR factorial\* OR placebo\* OR random\* OR volunteer\*)) NOT TI,AB,FT(rat OR rats OR mouse OR mice OR pig OR pigs OR piglet OR piglets OR porcine OR animal)

### Google scholar

("necrotizing enterocolitis" OR "necrotising enterocolitis" OR "enterocolitis necroticans" OR "typhlitis" OR "pneumatosis intestinalis") AND (random AND trial)

**WHO International Clinical Trials Registry Platform** (search covers: Australian New Zealand Clinical Trials Registry; Chinese Clinical Trial Registry; EU Clinical Trials Register (EU-CTR); The Netherlands National Trial Register; Brazilian Clinical Trials Registry (ReBec); Clinical Trials Registry – India, Korea, Cuba, Iran, Thailand,... )

("necrotizing enterocolitis" OR "necrotising enterocolitis" OR "enterocolitis necroticans" OR "typhlitis" OR "pneumatosis intestinalis")

### The ISRCTN registry

("necrotizing enterocolitis" OR "necrotising enterocolitis" OR "enterocolitis necroticans" OR "typhlitis" OR "pneumatosis intestinalis")

### clinicaltrials.gov

( "necrotizing enterocolitis" OR "necrotising enterocolitis" OR "pneumatosis intestinalis" ) | Interventional Studies

( "necrotizing enterocolitis" OR "necrotising enterocolitis" OR "pneumatosis intestinalis" ) AND ( random\* OR placebo OR trial )

## Appendix 2: References to trials included in the network meta-analysis

1. Al-Hosni M, Duenas M, Hawk M, et al. Probiotics-supplemented feeding in extremely low-birth-weight infants. *J Perinatol* 2012; **32**(4): 253-9.
2. Arora S, Khurana MS, Saini R. To study the role of probiotics in the prevention of necrotizing enterocolitis in preterm neonates. *International Journal of Contemporary Pediatrics* 2017; **4**(5): 1792-7.
3. Bin-Nun A, Bromiker R, Wilschanski M, et al. Oral probiotics prevent necrotizing enterocolitis in very low birth weight neonates. *J Pediatr* 2005; **147**(2): 192-6.
4. Braga TD, Da Silva GAP, De Lira PIC, De Carvalho Lima M. Efficacy of Bifidobacterium breve and Lactobacillus casei oral supplementation on necrotizing enterocolitis in very-low-birth-weight preterm infants: A double-blind, randomized, controlled trial. *Am J Clin Nutr* 2011; **93**(1): 81-6.
5. Chowdhury T, Ali MM, Hossain MM, et al. Efficacy of Probiotics Versus Placebo in the Prevention of Necrotizing Enterocolitis in Preterm Very Low Birth Weight Infants: A Double-Blind Randomized Controlled Trial. *Journal of the College of Physicians and Surgeons--Pakistan : JCPSP* 2016; **26**(9): 770-4.
6. Chrzanowska-Liszewska D, Seliga-Siwecka J, Kornacka MK. The effect of Lactobacillus rhamnosus GG supplemented enteral feeding on the microbiotic flora of preterm infants-double blinded randomized control trial. *Early Hum Dev* 2012; **88**(1): 57-60.
7. Costalos C, Skouteri V, Gounaris A, et al. Enteral feeding of premature infants with Saccharomyces boulardii. *Early Hum Dev* 2003; **74**(2): 89-96.
8. Costeloe K, Hardy P, Juszczak E, Wilks M, Millar MR. Bifidobacterium breve BBG-001 in very preterm infants: A randomised controlled phase 3 trial. *The Lancet* 2016; **387**(10019): 649-60.
9. Dani C, Biadaoli R, Bertini G, Martelli E, Rubaltelli FF. Probiotics feeding in prevention of urinary tract infection, bacterial sepsis and necrotizing enterocolitis in preterm infants. A prospective double-blind study. *Biology of the neonate* 2002; **82**(2): 103-8.
10. Dashti AS, Afjeh SA, Basiry A, Shirvani F, Seifi K, Taheri ZM. Prophylactic probiotics for prevention of necrotizing enterocolitis (NEC) in low birth weight neonates. *Arch Pediatr Infect Dis* 2014; **2**(1): 174-9.
11. Demirel G, Erdeve O, Celik IH, Dilmen U. Saccharomyces boulardii for prevention of necrotizing enterocolitis in preterm infants: A randomized, controlled study. *Acta Paediatr Int J Paediatr* 2013; **102**(12): e560-e5.
12. Deng J, Chen K. Early minimal feeding combined with probiotics to prevent necrotizing enterocolitis in preterm infant. *Chinese Journal of Modern Drug Application* 2010; **4**: 13-4.
13. Di M, Li X. Effects of Bifidobacterium supplementation for prevention of necrotizing enterocolitis in preterm infants: a randomized, controlled trial. *Zhong Guo She Qu Yi Shi* 2010; **231**(69).
14. Dilli D, Aydin B, Fettah ND, et al. The propre-save study: Effects of probiotics and prebiotics alone or combined on necrotizing enterocolitis in very low birth weight infants. *J Pediatr* 2015; **166**(3): 545-51.
15. Dongol Singh S, Klobassa D, Resch B, Urlesberger B, Shrestha R. Placebo Controlled Introduction of Prophylactic Supplementation of Probiotics to Decrease the Incidence of Necrotizing Enterocolitis at Dhulikhel Hospital in Nepal. *Kathmandu Univ Med J* 2017; **60**(4): 319-23.
16. Dutta S, Ray P, Narang A. Comparison of Stool Colonization in Premature Infants by Three Dose Regimes of a Probiotic Combination: A Randomized Controlled Trial. *Am J Perinatol* 2015; **32**(8): 733-40.
17. Fernández-Carrocer LA, Solis-Herrera A, Cabanillas-Ayón M, et al. Double-blind, randomised clinical assay to evaluate the efficacy of probiotics in preterm newborns weighing less than 1500 g in the prevention of necrotising enterocolitis. *Arch Dis Child Fetal Neonatal Ed* 2013; **98**(1): F5-F9.

18. Fujii T, Ohtsuka Y, Lee T, et al. Bifidobacterium breve enhances transforming growth factor beta1 signaling by regulating Smad7 expression in preterm infants. *J Pediatr Gastroenterol Nutr* 2006; **43**(1): 83-8.
19. Hariharan D, Balasubramanian L, Kannappan V, Veluswami G. Probiotic supplementation in VLBW preterm infants improves feeding tolerance and reduces risk of gram negative sepsis. *J Pediatr Gastroenterol Nutr* 2016; **62**: 655.
20. Hays S, Jacquot A, Gauthier H, et al. Probiotics and growth in preterm infants: A randomized controlled trial, PREMAPRO study. *Clin Nutr* 2016; **35**(4): 802-11.
21. Hernández-Enríquez NP, Rosas-Sumano AB, Monzoy-Ventre MA, Galicia-Flores L. Lactobacillus reuteri DSM 17938 en la prevención de enterocolitis necrosante en recién nacidos prematuros. Estudio piloto de eficacia y seguridad. *Rev Mex Pediatr* 2016; **83**(2): 37-43.
22. Hikaru H, Koichi K, Yayoi Y, et al. Bifidobacteria prevents preterm infants from developing infection and sepsis. *Int J Probiotics Prebiotics* 2010; **5**(1): 33-6.
23. Hua XT, Tang J, Mu DZ. Effect of oral administration of probiotics on intestinal colonization with drug-resistant bacteria in preterm infants. [Chinese]. *Chinese Journal of Contemporary Pediatrics* 2014; **16**(6): 606-9.
24. Huang B, Yang H, Huang X. Probiotics supplementation for prevention of necrotizing enterocolitis in very low-birth-weight neonates: a randomized, controlled trial. *Journal of Guangdong Medical College* 2009; **27**: 37-9.
25. Indrio F, Riezzo G, Tafuri S, et al. Probiotic Supplementation in Preterm: Feeding Intolerance and Hospital Cost. *Nutrients* 2017; **9**(9).
26. Jacobs SE, Tobin JM, Opie GF, et al. Probiotic effects on late-onset sepsis in very preterm infants: A randomized controlled trial. *Pediatrics* 2013; **132**(6): 1055-62.
27. Kanic Z, Micetic Turk D, Burja S, Kanic V, Dinevski D. Influence of a combination of probiotics on bacterial infections in very low birthweight newborns. *Wien Klin Wochenschr* 2015; **127**: 210-5.
28. Ke D, Su Z, Li L. Effects of Bifido supplement for prevention of necrotizing enterocolitis in preterm infants: a randomized controlled trial. *Chin Pediatr Emerg Med* 2008; **12**: 69-71.
29. Kitajima H, Sumida Y, Tanaka R, Yuki N, Takayama H, Fujimura M. Early administration of Bifidobacterium breve to preterm infants: randomised controlled trial. *Arch Dis Child Fetal Neonatal Ed* 1997; **76**(2): F101-7.
30. Lin HC, Su BH, Chen AC, et al. Oral probiotics reduce the incidence and severity of necrotizing enterocolitis in very low birth weight infants. *Pediatrics* 2005; **115**(1): 1-4.
31. Lin HC, Hsu CH, Chen HL, et al. Oral probiotics prevent necrotizing enterocolitis in very low birth weight preterm infants: a multicenter, randomized, controlled trial. *Pediatrics* 2008; **122**(4): 693-700.
32. Manzoni P, Meyer M, Stolfi I, et al. Bovine lactoferrin supplementation for prevention of necrotizing enterocolitis in very-low-birth-weight neonates: A randomized clinical trial. *Early Hum Dev* 2014; **90**(SUPPL.1): S60-S5.
33. Mihatsch WA, Vossbeck S, Eikmanns B, Hoegel J, Pohlandt F. Effect of bifidobacterium lactis on the incidence of nosocomial infections in very-low-birth-weight infants: A randomized controlled trial. *Neonatology* 2010; **98**(2): 156-63.
34. Millar MR, Bacon C, Smith SL, Walker V, Hall MA. Enteral Feeding of Premature-Infants with Lactobacillus Gg. *Archives of Disease in Childhood* 1993; **69**(5): 483-7.

35. Mohan R, Koebnick C, Schildt J, Mueller M, Radke M, Blaut M. Effects of Bifidobacterium lactis Bb12 supplementation on body weight, fecal pH, acetate, lactate, calprotectin, and IgA in preterm infants. *Pediatr Res* 2008; **64**(4): 418-22.
36. Oncel MY, Sari FN, Arayici S, et al. Lactobacillus Reuteri for the prevention of necrotising enterocolitis in very low birthweight infants: A randomised controlled trial. *Arch Dis Child Fetal Neonatal Ed* 2014; **99**(2): F110-F5.
37. Patole S, Keil AD, Chang A, et al. Effect of Bifidobacterium breve M-16V supplementation on fecal bifidobacteria in preterm neonates - A randomised double blind placebo controlled trial. *PLoS ONE* 2014; **9**(3): e89511.
38. Punnahitananda S, Thaithumyanon P, Soongsawang K. Nosocomial infection and necrotizing enterocolitis in preterm neonates treated with Lactobacillus acidophilus and Bifidobacterium infantis in a neonatal intensive care unit: A randomized controlled study. *The 14th Congress of the Federation of Asia Oceania Perinatal Societies* 2006.
39. Qiao LX, Zhu WY, Zhang HY, Wang H. Effect of early administration of probiotics on gut microflora and feeding in pre-term infants: a randomized controlled trial. *The journal of maternal-fetal & neonatal medicine : the official journal of the European Association of Perinatal Medicine, the Federation of Asia and Oceania Perinatal Societies, the International Society of Perinatal Obstet* 2017; **30**(1): 13-6.
40. Ren B. Preventive effect of Bifidobacterium tetravaccine tablets in premature infants with necrotizing enterocolitis. *Journal of Pediatric Pharmacy* 2010; **16**(2): 24-5.
41. Reuman PD, Duckworth DH, Smith KL, Kagan R, Bucciarelli RL, Ayoub EM. Lack of effect of Lactobacillus on gastrointestinal bacterial colonization in premature infants. *Pediatric infectious disease* 1986; **5**(6): 663-8.
42. Rojas MA, Lozano JM, Rojas MX, et al. Prophylactic probiotics to prevent death and nosocomial infection in preterm infants. *Pediatrics* 2012; **130**(5): e1113-e20.
43. Romeo MG, Romeo DM, Trovato L, et al. Role of probiotics in the prevention of the enteric colonization by Candida in preterm newborns: incidence of late-onset sepsis and neurological outcome. *J Perinatol* 2011; **31**(1): 63-9.
44. Rouge C, Piloquet H, Butel MJ, et al. Oral supplementation with probiotics in very-low-birth-weight preterm infants: a randomized, double-blind, placebo-controlled trial. *Am J Clin Nutr* 2009; **89**(6): 1828-35.
45. Roy A, Chaudhuri J, Sarkar D, Ghosh P, Chakraborty S. Role of Enteric Supplementation of Probiotics on Late-onset Sepsis by Candida species in Preterm Low Birth Weight Neonates: A Randomized, Double Blind, Placebo-controlled Trial. *North American journal of medical sciences* 2014; **6**(1): 50-7.
46. Sadowska-Krawczenko I, Korbal P, Polak A, Wietlicka-Piszcz M, Szajewska H. Lactobacillus rhamnosus ATC A07FA for preventing necrotizing enterocolitis in very-low-birth-weight preterm infants: A randomized controlled trial (preliminary results). [Polish]. *Pediatrica polska* 2012; **87**(2): 139-45.
47. Saengtawesin V, Tangpolkaiwalsak R, Kanjanapattankul W. Effect of oral probiotics supplementation in the prevention of necrotizing enterocolitis among very low birth weight preterm infants. *Journal of the Medical Association of Thailand = Chotmaihet thangphaet* 2014; **97**(Suppl 6): S20-S5.
48. Samanta M, Sarkar M, Ghosh P, Ghosh J, Sinha M, Chatterjee S. Prophylactic probiotics for prevention of necrotizing enterocolitis in very low birth weight newborns. *J Trop Pediatr* 2009; **55**(2): 128-31.
49. Sari FN, Dizdar EA, Oguz S, Erdeve O, Uras N, Dilmen U. Oral probiotics: Lactobacillus sporogenes for prevention of necrotizing enterocolitis in very low-birth weight infants: A randomized, controlled trial. *Eur J Clin Nutr* 2011; **65**(4): 434-9.



50. Serce O, Benzer D, Gursoy T, Karatekin G, Ovali F. Efficacy of *saccharomyces boulardii* on necrotizing enterocolitis or sepsis in very low birth weight infants: A randomised controlled trial. *Early Hum Dev* 2013; **89**(12): 1033-6.
51. Shadkam MN, Jalalizadeh F, Nasiriani K. Effects of probiotic *lactobacillus reuteri* (DSM 17938) on the incidence of necrotizing enterocolitis in very low birth weight premature infants. *Iranian Journal of Neonatology* 2015; **6**(4): 15-20.
52. Shashidhar A, Suman Rao PN, Nesargi S, Bhat S, Chandrakala BS. Probiotics for Promoting Feed Tolerance in Very Low Birth Weight Neonates - A Randomized Controlled Trial. *Indian Pediatr* 2017; **54**(5): 363-7.
53. Sinha A, Gupta SS, Chellani H, et al. Role of probiotics VSL#3 in prevention of suspected sepsis in low birthweight infants in India: a randomised controlled trial. *BMJ Open* 2015; **5**(7).
54. Stratiki Z, Costalos C, Sevastiadou S, et al. The effect of a bifidobacter supplemented bovine milk on intestinal permeability of preterm infants. *Early Hum Dev* 2007; **83**(9): 575-9.
55. Tewari VV, Dubey SK, Gupta G. *Bacillus clausii* for Prevention of Late-onset Sepsis in Preterm Infants: A Randomized Controlled Trial. *J Trop Pediatr* 2015; **61**(5): 377-84.
56. Totsu S, Yamasaki C, Terahara M, Uchiyama A, Kusuda S. Bifidobacterium and enteral feeding in preterm infants: Cluster-randomized trial. *Pediatrics International* 2014; **56**(5): 714-9.
57. Van Niekerk E, Kirsten GF, Nel DG, Blaauw R. Probiotics, feeding tolerance, and growth: A comparison between HIV-exposed and unexposed very low birth weight infants. *Nutrition* 2014; **30**(6): 645-53.
58. Van Niekerk E, Nel DG, Blaauw R, Kirsten GF. Probiotics Reduce Necrotizing Enterocolitis Severity in HIV-exposed Premature Infants. *J Trop Pediatr* 2015; **61**(3): 155-64.
59. Wejryd E, et al. Probiotics promoted head growth in extremely low birthweight infants in a double-blind placebo-controlled trial. *Acta Paediatr*, 2019. 108: 62-69.
60. Xiao-yuan Z, Lian-qiao LI, Xuan-xuan GAO, Li-duan SU. Relative Factors of Neonatal Necrotizing Enterocolitis and Preventive Effect of Microeco-Preparation. *Journal of Applied Clinical Pediatrics* 2007; **22**(18):1392-93.
61. Xu L, Wang Y, Fu J, Sun M, Mao Z, Vandenplas Y. A double-blinded randomized trial on growth and feeding tolerance with *Saccharomyces boulardii* CNCM I-745 in formula-fed preterm infants. *Jornal de Pediatria* 2016; **92**(3): 296-301.
62. Yang S, Haiying Y, Bin G, Shu X, Xianglan D, Jiang W. The Clinical Application Value of Endangered Preterm Infants Given Earlier Amounts of Micro Feedings and Adding Probiotics. *Journal of Pediatric Pharmacy* 2011; **17**(3):21-24.
63. Zhou N. The observation of effect of probiotics in the prevention of neonatal necrotizing enterocolitis. *Chinese Journal of Ethnomedicine and Ethnopharmacy* 2012; 21: 81.

### Appendix 3: Characteristics of participants of trials included in the network meta-analysis

| Ref # | Study (year)                 | LN  | BW (g) | GA (wks) | APGAR M5 | % C-Sec | % MV | % IUGR | % SGA | % MM fed | % FM fed |
|-------|------------------------------|-----|--------|----------|----------|---------|------|--------|-------|----------|----------|
| 1     | Al-Hosni (2012)              | EN  | 778.5  | 25.7     | 7.5      | 51.5    | -    | -      | 0.0   | -        | 0.0      |
| 2     | Arora (2017)                 | EN  | 1700.0 | 32.9     | -        | 82.0    | -    | 9.3    | 22.7  | 100.0    | 0.0      |
| 3     | Bin-Nun (2005)               | EN  | 1131.4 | 29.5     | 8.0      | 78.0    | -    | -      | 20.0  | 61.4     | 24.1     |
| 4     | Braga (2011)                 | EN  | 1173.7 | 29.4     | 8.0      | 51.5    | -    | -      | 23.0  | -        | 0.0      |
| 5     | Chowdhury (2016)             | EN  | 1324.0 | 31.5     | -        | -       | -    | -      | -     | -        | 0.0      |
| 6     | Chrzanowska-Lisiewska (2012) | EN  | 1257.8 | 29.5     | 6.6      | 72.3    | -    | -      | 100.0 | 0.0      | 100.0    |
| 7     | Costalos (2003)              | EN  | 1648.1 | 31.4     | -        | 44.8    | -    | 15.0   | -     | 0.0      | 100.0    |
| 8     | Costeloe (2016)              | EN  | 1041.0 | 28.0     | -        | 52.7    | -    | -      | -     | 46.1     | 34.1     |
| 9     | Dani (2002)                  | EN  | 1334.9 | 30.8     | -        | 79.3    | 45.5 | 17.3   | -     | -        | 35.0     |
| 10    | Dashti (2014)                | EN  | 1406.4 | 31.2     | 9.2      | 82.4    | 50.0 | -      | -     | 34.6     | 5.9      |
| 11    | Demirel (2013)               | EN  | 1147.4 | 29.3     | 6.0      | 80.4    | -    | -      | -     | -        | -        |
| 12    | Deng (2010)                  | CHN | 1628.7 | 32.8     | -        | -       | -    | -      | -     | -        | -        |
| 13    | Di (2010)                    | CHN | -      | 33.0     | -        | -       | -    | -      | -     | -        | -        |
| 14    | Dilli (2015)                 | EN  | 1204.3 | 28.7     | 7.0      | 34.5    | -    | -      | -     | -        | 21.8     |
| 15    | Dongol Singh (2017)          | EN  | -      | -        | -        | -       | -    | -      | -     | -        | -        |
| 16    | Dutta (2014)                 | EN  | 1323.3 | 30.9     | 8.9      | 32.9    | 29.5 | -      | -     | -        | 7.4      |
| 17    | Fernández-Carrocerá (2013)   | EN  | 1130.0 | 31.1     | -        | -       | 2.0  | -      | 78.0  | -        | -        |
| 18    | Fujii (2006)                 | EN  | 1427.7 | 31.3     | -        | -       | -    | -      | -     | -        | -        |
| 19    | Hariharan (2016)             | EN  | 959.2  | 29.0     | -        | -       | 36.7 | -      | -     | -        | -        |
| 20    | Hays (2016)                  | EN  | 1170.0 | 29.2     | -        | 78.2    | 51.8 | -      | -     | -        | 0.5      |
| 21    | Hernandez-Enriquez (2016)    | SPN | 1293.3 | 31.4     | -        | 72.3    | 13.6 | -      | -     | -        | 0.0      |
| 22    | Hikaru (2010)                | EN  | 1036.4 | 28.3     | -        | -       | -    | -      | -     | -        | -        |
| 23    | Hua (2014)                   | CHN | 1786.6 | 33.1     | -        | 60.3    | -    | -      | 23.0  | 24.1     | 75.9     |
| 24    | Huang (2009)                 | CHN | 1100.0 | 30.1     | -        | -       | -    | -      | -     | -        | -        |
| 25    | Indrio (2017)                | EN  | 1439.1 | -        | -        | 85.0    | -    | -      | 0.0   | 0.0      | 100.0    |
| 26    | Jacobs (2013)                | EN  | 1055.5 | 27.9     | 8.0      | 67.0    | -    | -      | -     | 50.8     | -        |
| 27    | Kanic (2015)                 | EN  | 1064.2 | 28.5     | 7.5      | -       | 77.5 | -      | -     | 31.3     | -        |
| 28    | Ke (2008)                    | CHN | -      | 33.5     | -        | -       | -    | -      | -     | -        | -        |
| 29    | Kitajima (1997)              | EN  | 1026.0 | 28.2     | -        | -       | -    | -      | 13.2  | -        | 0.0      |

|    |                            |     |        |      |     |      |      |      |      |       |       |
|----|----------------------------|-----|--------|------|-----|------|------|------|------|-------|-------|
| 30 | Lin (2005)                 | EN  | 1087.2 | 28.3 | -   | 55.6 | -    | -    | 22.6 | -     | 0.0   |
| 31 | Lin (2008)                 | EN  | 1053.1 | -    | -   | 65.7 | -    | -    | 21.4 | 65.4  | 0.0   |
| 32 | Manzoni (2014)             | EN  | 1134.8 | 29.6 | 7.4 | 78.1 | -    | -    | -    | 28.0  | 17.9  |
| 33 | Mihatsch (2010)            | EN  | 863.4  | 26.7 | 7.9 | 69.4 | -    | -    | 10.0 | 17.2  | 67.2  |
| 34 | Millar (1993)              | EN  | 1472.5 | 30.3 | -   | 40.0 | -    | -    | -    | -     | -     |
| 35 | Mohan (2008)               | EN  | 1425.3 | 31.2 | 8.1 | 88.4 | -    | -    | -    | -     | 15.9  |
| 36 | Oncel (2014)               | EN  | 1059.5 | 28.1 | 8.0 | 78.8 | -    | -    | 8.2  | 15.0  | 13.5  |
| 37 | Patole (2014)              | EN  | 1060.2 | 28.5 | -   | 69.9 | -    | -    | 25.2 | -     | 1.3   |
| 38 | Punnahitananda (2006)      | EN  | 1135.8 | 29.2 | -   | -    | -    | -    | -    | -     | -     |
| 39 | Qiao (2016)                | EN  | 1623.0 | 32.3 | -   | -    | 28.3 | -    | -    | 0.0   | 100.0 |
| 40 | Ren (2010)                 | CHN | 1700.0 | 31.0 | -   | -    | -    | -    | -    | -     | -     |
| 41 | Reuman (1986)              | EN  | 1371.5 | 30.6 | 7.1 | -    | -    | -    | -    | -     | -     |
| 42 | Rojas (2012)               | EN  | 1522.9 | 32.0 | 9.0 | 82.9 | -    | -    | 28.9 | 2.8   | 40.5  |
| 43 | Romeo (2011)               | EN  | 1961.7 | 33.5 | -   | 91.0 | -    | -    | -    | -     | -     |
| 44 | Rouge (2009)               | EN  | 1084.8 | 28.1 | 8.9 | 67.0 | -    | 4.3  | -    | -     | -     |
| 45 | Roy (2014)                 | EN  | 1130.5 | 32.1 | -   | 80.4 | 9.8  | -    | -    | -     | 0.0   |
| 46 | Sadowska-Krawczenko (2012) | POL | 973.1  | 29.5 | 7.0 | 65.5 | -    | 41.8 | -    | -     | 0.0   |
| 47 | Saengtawesin (2014)        | EN  | 1229.6 | 30.8 | -   | 65.0 | -    | -    | 8.3  | -     | 0.0   |
| 48 | Samanta (2009)             | EN  | 1191.4 | 30.1 | -   | 47.8 | -    | -    | 34.4 | 100.0 | 0.0   |
| 49 | Sari (2011)                | EN  | 1254.5 | 29.6 | -   | 71.5 | -    | -    | 7.2  | 28.1  | 0.0   |
| 50 | Serce (2013)               | EN  | 1144.0 | 28.8 | 7.5 | 84.6 | -    | -    | 11.0 | -     | -     |
| 51 | Shadkam (2015)             | EN  | 1407.5 | 30.9 | -   | -    | -    | -    | -    | 100.0 | 0.0   |
| 52 | Shashidhar (2017)          | EN  | 1223.0 | 31.1 | 8.0 | 62.5 | -    | -    | 35.6 | 45.2  | 0.0   |
| 53 | Sinha (2015)               | EN  | 2262.0 | -    | -   | 5.8  | -    | -    | -    | -     | 0.0   |
| 54 | Stratiki (2007)            | EN  | 1500.0 | 30.8 | 9.0 | 36.0 | 13.3 | -    | -    | 0.0   | 100.0 |
| 55 | Tewari (2015)              | EN  | 1363.0 | 30.0 | -   | 60.7 | -    | 13.2 | -    | -     | 0.0   |
| 56 | Totsu (2014)               | EN  | 1007.7 | 28.6 | 7.5 | 68.6 | -    | -    | -    | -     | -     |
| 57 | van Neikerk (2014)         | EN  | 1009.0 | 28.7 | -   | 78.0 | -    | 25.7 | -    | 0.0   | 0.0   |
| 58 | van Neikerk (2015)         | EN  | 972.0  | 28.7 | -   | 74.0 | -    | 18.2 | -    | 100.0 | 0.0   |
| 59 | Wejryd (2018)              | EN  | 733.0  | 25.5 | -   | -    | -    | -    | -    | -     | 0.0   |
| 60 | Xiao-yuan (2007)           | CHN | 1745.0 | 31.0 | -   | -    | -    | -    | -    | -     | 4.0   |
| 61 | Xu (2016)                  | EN  | 1951.9 | 33.0 | -   | -    | -    | -    | -    | 0.0   | 100.0 |

|    |             |     |        |      |   |   |   |   |   |     |       |
|----|-------------|-----|--------|------|---|---|---|---|---|-----|-------|
| 62 | Yang (2011) | CHN | -      | -    | - | - | - | - | - | 0.0 | 100.0 |
| 63 | Zhou (2012) | CHN | 1891.3 | 34.3 | - | - | - | - | - | -   | -     |

Footnote: LN = Language, EN = English, CHN = Chinese, POL = Polish, SPN = Spanish, BW = birth weight, GA = gestational age (weeks), APGAR M5 = APGAR score at 5-minute, % C-Sec = percent infants delivered by caesarean section, % MV = percent infants with mechanical ventilation support, % IUGR = percent infants with intrauterine growth restriction, % SGA = percent infants small for gestational age, % MM fed = percent infant exclusively fed with mother's milk, % FM fed = percent infant exclusively fed with formula milk.

#### Appendix 4: Treatment characteristics of trials and outcomes included in the network meta-analysis

| Ref # | Study (year)                 | Arm 1                    | n   | Probiotic formulation                                                                                                                                                   | Trt duration (weeks)            | Arm 2                | n   | Probiotic formulation | Trt duration (weeks) | Arm 3 | n | Probiotic formulation | Trt duration (weeks) | Arm 4 | n | Outcomes                |
|-------|------------------------------|--------------------------|-----|-------------------------------------------------------------------------------------------------------------------------------------------------------------------------|---------------------------------|----------------------|-----|-----------------------|----------------------|-------|---|-----------------------|----------------------|-------|---|-------------------------|
| 1     | Al-Hosni (2012)              | Multi-strain probiotics  | 50  | <i>L. rhamnosus</i> ATCC 53103<br><i>B. longum</i> subsp. <i>infantis</i>                                                                                               | up to 34 wks PMA or discharge   | Control/No treatment | 51  | NA                    | -                    | -     | - | -                     | -                    | -     | - | ACM, NEC, LOS           |
| 2     | Arora (2017)                 | Multi-strain probiotics  | 75  | <i>L. rhamnosus</i> ; <i>L. acidophilus</i><br><i>B. longum</i> subsp. <i>longum</i><br><i>S. boulardii</i>                                                             | 2                               | Control/No treatment | 75  | NA                    | -                    | -     | - | -                     | -                    | -     | - | ACM, NEC, LOS, TFF, HOS |
| 3     | Bin-Nun (2005)               | Multi-strain probiotics  | 72  | <i>B. longum</i> subsp. <i>infantis</i> ; <i>B. bifidum</i><br><i>S. salivarius</i> subsp. <i>thermophilus</i>                                                          | up to 36 wks PMA                | Placebo              | 73  | NA                    | -                    | -     | - | -                     | -                    | -     | - | ACM, NEC, LOS, TFF      |
| 4     | Braga (2011)                 | Multi-strain probiotics  | 119 | <i>L. casei</i><br><i>B. breve</i>                                                                                                                                      | 4                               | Control/No treatment | 112 | NA                    | -                    | -     | - | -                     | -                    | -     | - | ACM, NEC, LOS, TFF      |
| 5     | Chowdhury (2016)             | Multi-strain probiotics  | 52  | <i>L. rhamnosus</i> ; <i>L. acidophilus</i> ; <i>L. casei</i><br><i>B. longum</i> subsp. <i>infantis</i> ; <i>B. bifidum</i> ;<br><i>B. longum</i> subsp. <i>longum</i> | until discharge                 | Control/No treatment | 50  | NA                    | -                    | -     | - | -                     | -                    | -     | - | NEC, TFF, HOS           |
| 6     | Chrzanowska-Lisiewska (2012) | Single strain probiotics | 21  | <i>L. rhamnosus</i> ATCC 53103                                                                                                                                          | 6                               | Preterm Formula      | 26  | NA                    | -                    | -     | - | -                     | -                    | -     | - | NEC, LOS, HOS           |
| 7     | Costalos (2003)              | Single strain probiotics | 51  | <i>S. boulardii</i>                                                                                                                                                     | ≥ 4                             | Preterm Formula      | 36  | NA                    | -                    | -     | - | -                     | -                    | -     | - | NEC, LOS, FIT, TFF      |
| 8     | Costeloe (2016)              | Single strain probiotics | 650 | <i>B. breve</i> YIT4010                                                                                                                                                 | up to 36 weeks PMA or discharge | Placebo              | 660 | NA                    | -                    | -     | - | -                     | -                    | -     | - | ACM, NEC, LOS, TFF, HOS |
| 9     | Dani (2002)                  | Single strain probiotics | 295 | <i>L. rhamnosus</i> ATCC 53103                                                                                                                                          | until discharge                 | Placebo              | 290 | NA                    | -                    | -     | - | -                     | -                    | -     | - | ACM, NEC, LOS           |
| 10    | Dashti (2014)                | Multi-strain probiotics  | 69  | <i>L. acidophilus</i> ; <i>L. rhamnosus</i> ; <i>L. delbrueckii</i> subsp. <i>bulgaricus</i> ; <i>L. casei</i>                                                          | NR                              | Placebo              | 67  | NA                    | -                    | -     | - | -                     | -                    | -     | - | ACM, NEC, LOS, TFF      |

|    |                            |                                     |     |                                                                                                                                                                                   |                            |                                     |     |                                                                                                             |        |                                    |     |                                                                                                             |        |         |                              |                              |
|----|----------------------------|-------------------------------------|-----|-----------------------------------------------------------------------------------------------------------------------------------------------------------------------------------|----------------------------|-------------------------------------|-----|-------------------------------------------------------------------------------------------------------------|--------|------------------------------------|-----|-------------------------------------------------------------------------------------------------------------|--------|---------|------------------------------|------------------------------|
|    |                            |                                     |     | <i>B. breve</i> ; <i>B. longum</i> subsp. <i>longum</i><br><i>S. salivarius</i> subsp. <i>thermophilus</i>                                                                        |                            |                                     |     |                                                                                                             |        |                                    |     |                                                                                                             |        |         |                              |                              |
| 11 | Demirel (2013)             | Single strain probiotics            | 135 | <i>S. boulardii</i>                                                                                                                                                               | until discharge            | Control/No treatment                | 136 | NA                                                                                                          | -      | -                                  | -   | -                                                                                                           | -      | -       | ACM, NEC, LOS, FIT, TFF, HOS |                              |
| 12 | Deng (2010)                | Multi-strain probiotics             | 63  | <i>L. acidophilus</i><br><i>B. longum</i> subsp. <i>longum</i><br><i>E. faecalis</i>                                                                                              | 2                          | Control/No treatment                | 62  | NA                                                                                                          | -      | -                                  | -   | -                                                                                                           | -      | -       | ACM, NEC                     |                              |
| 13 | Di (2010)                  | Multi-strain probiotics             | 182 | <i>Bacillus subtilis</i><br><i>E. faecium</i>                                                                                                                                     | until discharge            | Control/No treatment                | 173 | NA                                                                                                          | -      | -                                  | -   | -                                                                                                           | -      | -       | ACM, NEC                     |                              |
| 14 | Dilli (2015)               | Single strain probiotics            | 100 | <i>B. animalis</i> subsp. <i>lactis</i>                                                                                                                                           | 8                          | Synbiotics                          | 100 | <i>B. animalis</i> subsp. <i>lactis</i> plus <i>inulin</i>                                                  | 8      | FOS                                | 100 | NA                                                                                                          | 8      | Placebo | 100<br>0                     | ACM, NEC, LOS, FIT, TFF, HOS |
| 15 | Dongol Singh (2017)        | Single strain probiotics            | 37  | <i>L. rhamnosus</i> LCR 35                                                                                                                                                        | Until full enteral feeding | Placebo                             | 35  | NA                                                                                                          | -      | -                                  | -   | -                                                                                                           | -      | -       | ACM, NEC                     |                              |
| 16 | Dutta (2014)               | Multi-strain probiotics (high dose) | 38  | <i>L. rhamnosus</i> ; <i>L. acidophilus</i><br><i>B. longum</i> subsp. <i>longum</i><br><i>S. boulardii</i>                                                                       | 3                          | Multi-strain probiotics (high dose) | 38  | <i>L. rhamnosus</i> ; <i>L. acidophilus</i><br><i>B. longum</i> subsp. <i>longum</i><br><i>S. boulardii</i> | 2      | Multi-strain probiotics (low dose) | 38  | <i>L. rhamnosus</i> ; <i>L. acidophilus</i><br><i>B. longum</i> subsp. <i>longum</i><br><i>S. boulardii</i> | 3      | Placebo | 35                           | ACM, NEC, LOS                |
| 17 | Fernández-Carrocerá (2013) | Multi-strain probiotics             | 75  | <i>L. rhamnosus</i> ; <i>L. acidophilus</i> ; <i>L. casei</i> ; <i>L. plantarum</i><br><i>B. longum</i> subsp. <i>infantis</i><br><i>S. salivarius</i> subsp. <i>thermophilus</i> | until discharge            | Control/No treatment                | 75  | NA                                                                                                          | -      | -                                  | -   | -                                                                                                           | -      | -       | ACM, NEC, LOS, TFF, HOS      |                              |
| 18 | Fujii (2006)               | Single strain probiotics            | 11  | <i>B. breve</i> M-16V                                                                                                                                                             | until discharge            | Placebo                             | 8   | NA                                                                                                          | -      | -                                  | -   | -                                                                                                           | -      | -       | NEC, LOS, HOS                |                              |
| 19 | Hariharan (2016)           | Multi-strain probiotics             | 93  | <i>L. acidophilus</i><br><i>B. bifidum</i><br><i>S. boulardii</i>                                                                                                                 | 6                          | Control/No treatment                | 103 | NA                                                                                                          | -      | -                                  | -   | -                                                                                                           | -      | -       | ACM, NEC, LOS, FIT, TFF      |                              |
| 20 | Hays (2016)                | Multi-strain probiotics             | 47  | <i>B. animalis</i> subsp. <i>lactis</i> ; <i>B. longum</i> subsp. <i>longum</i>                                                                                                   | 4 to 6                     | Single strain probiotics            | 48  | <i>B. longum</i> subsp. <i>longum</i>                                                                       | 4 to 6 | Single strain probiotics           | 50  | <i>B. animalis</i> subsp. <i>lactis</i>                                                                     | 4 to 6 | Placebo | 52                           | ACM, NEC, LOS, TFF           |

|    |                           |                          |     |                                                                                                                                                                 |                                    |                      |     |    |   |   |   |   |   |   |                         |
|----|---------------------------|--------------------------|-----|-----------------------------------------------------------------------------------------------------------------------------------------------------------------|------------------------------------|----------------------|-----|----|---|---|---|---|---|---|-------------------------|
| 21 | Hernandez-Enriquez (2016) | Single strain probiotics | 24  | <i>L. reuteri</i> DSM 17938                                                                                                                                     | 3                                  | Control/No treatment | 20  | NA | - | - | - | - | - | - | NEC, TFF, HOS           |
| 22 | Hikaru (2010)             | Single strain probiotics | 108 | <i>B. breve</i> M-16V                                                                                                                                           | Until discharge                    | Placebo              | 100 | NA | - | - | - | - | - | - | ACM, LOS, TFF, HOS      |
| 23 | Hua (2014)                | Multi-strain probiotics  | 119 | <i>L. delbrueckii</i> subsp. <i>bulgaricus</i><br><i>B. longum</i> subsp. <i>longum</i><br><i>S. salivarius</i> subsp. <i>thermophilus</i>                      | 2                                  | Control/No treatment | 138 | NA | - | - | - | - | - | - | ACM, NEC, LOS, FIT      |
| 24 | Huang (2009)              | Single strain probiotics | 95  | <i>B. adolescentis</i>                                                                                                                                          | 1 to 2                             | Control/No treatment | 88  | NA | - | - | - | - | - | - | ACM, NEC                |
| 25 | Indrio (2017)             | Single strain probiotics | 30  | <i>L. reuteri</i> DSM 17938                                                                                                                                     | 4                                  | Placebo              | 30  | NA | - | - | - | - | - | - | TFF, HOS                |
| 26 | Jacobs (2013)             | Multi-strain probiotics  | 548 | <i>B. longum</i> subsp. <i>infantis</i> DSM 33361;<br><i>B. animalis</i> subsp. <i>lactis</i> DSM 15954<br><i>S. salivarius</i> subsp. <i>thermophilus</i> TH-4 | term corrected age/until discharge | Placebo              | 551 | NA | - | - | - | - | - | - | ACM, NEC, LOS, TFF, HOS |
| 27 | Kanic (2015)              | Multi-strain probiotics  | 40  | <i>L. gasseri</i> PTA-5845<br><i>B. longum</i> subsp. <i>infantis</i> PTA-5843<br><i>E. faecium</i> PTA-5844                                                    | until discharge                    | Control/No treatment | 40  | NA | - | - | - | - | - | - | ACM, NEC, LOS, TFF, HOS |
| 28 | Ke (2008)                 | Multi-strain probiotics  | 438 | <i>L. acidophilus</i><br><i>B. longum</i> subsp. <i>longum</i><br><i>E. faecalis</i>                                                                            | until discharge                    | Control/No treatment | 446 | NA | - | - | - | - | - | - | ACM, NEC                |
| 29 | Kitajima (1997)           | Single strain probiotics | 45  | <i>B. breve</i> YIT4010                                                                                                                                         | 4                                  | Control/No treatment | 46  | NA | - | - | - | - | - | - | ACM, NEC, LOS           |
| 30 | Lin (2005)                | Multi-strain probiotics  | 180 | <i>L. acidophilus</i><br><i>B. longum</i> subsp. <i>infantis</i>                                                                                                | until discharge                    | Control/No treatment | 187 | NA | - | - | - | - | - | - | ACM, NEC, LOS, HOS      |
| 31 | Lin (2008)                | Multi-strain probiotics  | 222 | <i>L. acidophilus</i><br><i>B. bifidum</i>                                                                                                                      | 6                                  | Placebo              | 221 | NA | - | - | - | - | - | - | ACM, NEC, LOS, TFF, HOS |

|    |                       |                          |     |                                                                                                                  |                         |                          |     |                                |                   |                      |     |   |   |   |   |                              |
|----|-----------------------|--------------------------|-----|------------------------------------------------------------------------------------------------------------------|-------------------------|--------------------------|-----|--------------------------------|-------------------|----------------------|-----|---|---|---|---|------------------------------|
| 32 | Manzoni (2014)        | Synbiotics               | 238 | <i>L. rhamnosus</i> ATCC 53103                                                                                   | 4 to 6                  | Lactoferrin              | 247 | NA                             | 4 to 6            | Placebo              | 258 | - | - | - | - | ACM, NEC, LOS, TFF, HOS      |
| 33 | Mihatsch (2010)       | Single strain probiotics | 91  | <i>B. animalis</i> subsp. <i>lactis</i> DSM 15954                                                                | until discharge         | Placebo                  | 89  | NA                             | -                 | -                    | -   | - | - | - | - | ACM, NEC, LOS, TFF           |
| 34 | Millar (1993)         | Single strain probiotics | 10  | <i>L. rhamnosus</i> ATCC 53103                                                                                   | 2 wks                   | Placebo                  | 10  | NA                             | -                 | -                    | -   | - | - | - | - | LOS, FIT                     |
| 35 | Mohan (2008)          | Single strain probiotics | 37  | <i>B. animalis</i> subsp. <i>lactis</i> DSM 15954                                                                | 3 wks                   | Placebo                  | 32  | NA                             | -                 | -                    | -   | - | - | - | - | NEC                          |
| 36 | Oncel (2014)          | Single strain probiotics | 200 | <i>L. reuteri</i> DSM 17938                                                                                      | 4 wks                   | Placebo                  | 200 | NA                             | -                 | -                    | -   | - | - | - | - | ACM, NEC, LOS, FIT, TFF, HOS |
| 37 | Patole (2014)         | Single strain probiotics | 79  | <i>B. breve</i> M-16V                                                                                            | corrected age of 37 wks | Placebo                  | 80  | NA                             | -                 | -                    | -   | - | - | - | - | ACM, NEC, LOS, TFF           |
| 38 | Punnahitananda (2006) | Multi-strain probiotics  | 89  | <i>L. acidophilus</i><br><i>B. longum</i> subsp. <i>infantis</i>                                                 | 4/until discharge       | Placebo                  | 85  | NA                             | -                 | -                    | -   | - | - | - | - | ACM                          |
| 39 | Qiao (2016)           | Multi-strain probiotics  | 30  | <i>L. acidophilus</i><br><i>B. longum</i> subsp. <i>longum</i><br><i>E. faecium</i>                              | 2 wks                   | Placebo                  | 30  | NA                             | -                 | -                    | -   | - | - | - | - | FIT                          |
| 40 | Ren (2010)            | Multi-strain probiotics  | 80  | <i>B. longum</i> subsp. <i>infantis</i><br><i>L. acidophilus</i><br><i>Bacillus cereus</i><br><i>E. faecalis</i> | 1 to 2 wks              | Control/No treatment     | 70  | NA                             | -                 | -                    | -   | - | - | - | - | ACM, NEC                     |
| 41 | Reuman (1986)         | Single strain probiotics | 15  | <i>L. acidophilus</i>                                                                                            | 4 wks                   | Placebo                  | 15  | NA                             | -                 | -                    | -   | - | - | - | - | ACM, NEC, HOS                |
| 42 | Rojas (2012)          | Single strain probiotics | 372 | <i>L. reuteri</i> DSM 17938                                                                                      | until discharge         | Placebo                  | 378 | NA                             | -                 | -                    | -   | - | - | - | - | ACM, NEC, LOS, FIT, HOS      |
| 43 | Romeo (2011)          | Single strain probiotics | 83  | <i>L. reuteri</i> ATCC 55730                                                                                     | 6/until discharge       | Single strain probiotics | 83  | <i>L. rhamnosus</i> ATCC 53103 | 6/until discharge | Control/No treatment | 83  | - | - | - | - | LOS, FIT, TFF, HOS           |
| 44 | Rouge (2009)          | Multi-strain probiotics  | 45  | <i>L. rhamnosus</i> ATCC 53103<br><i>B. longum</i> subsp. <i>longum</i> Reuter ATCC BAA-999                      | until discharge         | Placebo                  | 49  | NA                             | -                 | -                    | -   | - | - | - | - | ACM, NEC, LOS, HOS           |



|    |                            |                          |     |                                                                                                                                                                                                                      |                            |                      |     |    |   |   |   |   |   |   |   |                              |
|----|----------------------------|--------------------------|-----|----------------------------------------------------------------------------------------------------------------------------------------------------------------------------------------------------------------------|----------------------------|----------------------|-----|----|---|---|---|---|---|---|---|------------------------------|
| 45 | Roy (2014)                 | Multi-strain probiotics  | 56  | <i>L. acidophilus</i><br><i>B. bifidum</i> ; <i>B. animalis</i> subsp. <i>lactis</i> ; <i>B. longum</i> subsp. <i>longum</i>                                                                                         | 6/until discharge          | Placebo              | 56  | NA | - | - | - | - | - | - | - | ACM, NEC, LOS, TFF, HOS      |
| 46 | Sadowska-Krawczenko (2012) | Single strain probiotics | 30  | <i>L. rhamnosus</i> ATC A07FA                                                                                                                                                                                        | Until discharge            | Placebo              | 25  | NA | - | - | - | - | - | - | - | ACM, NEC, LOS, HOS           |
| 47 | Saengtawesin (2014)        | Multi-strain probiotics  | 31  | <i>L. acidophilus</i><br><i>B. bifidum</i>                                                                                                                                                                           | 6/until discharge          | Control/No treatment | 29  | NA | - | - | - | - | - | - | - | ACM, NEC, NRM, LOS, TFF, HOS |
| 48 | Samanta (2009)             | Multi-strain probiotics  | 91  | <i>L. acidophilus</i><br><i>B. longum</i> subsp. <i>infantis</i> ; <i>B. animalis</i> subsp. <i>lactis</i> ; <i>B. longum</i> subsp. <i>longum</i>                                                                   | until discharge            | MBM                  | 95  | NA | - | - | - | - | - | - | - | ACM, NEC, LOS, TFF, HOS      |
| 49 | Sari (2011)                | Single strain probiotics | 121 | <i>Bacillus coagulans</i>                                                                                                                                                                                            | until discharge            | Placebo              | 121 | NA | - | - | - | - | - | - | - | ACM, NEC, LOS, FIT, TFF, HOS |
| 50 | Serce (2013)               | Single strain probiotics | 104 | <i>S. boulardii</i>                                                                                                                                                                                                  | until discharge            | Placebo              | 104 | NA | - | - | - | - | - | - | - | ACM, NEC, LOS, TFF, HOS      |
| 51 | Shadkam (2015)             | Single strain probiotics | 30  | <i>L. reuteri</i> DMS 17938                                                                                                                                                                                          | Until full enteral feeding | Placebo              | 30  | NA | - | - | - | - | - | - | - | ACM, NEC, LOS, TFF           |
| 52 | Shashidhar (2017)          | Multi-strain probiotics  | 48  | <i>L. acidophilus</i> ; <i>L. rhamnosus</i><br><i>B. longum</i> subsp. <i>longum</i><br><i>S. boulardii</i>                                                                                                          | 4                          | Placebo              | 48  | NA | - | - | - | - | - | - | - | ACM, NEC, TFF, HOS           |
| 53 | Sinha (2015)               | Multi-strain probiotics  | 668 | <i>L. acidophilus</i> ; <i>L. plantarum</i> ; <i>L. casei</i> ; <i>B. breve</i> ; <i>B. longum</i> subsp. <i>infantis</i> ; <i>B. longum</i> subsp. <i>longum</i><br><i>S. salivarius</i> subsp. <i>thermophilus</i> | 4                          | Placebo              | 672 | NA | - | - | - | - | - | - | - | ACM, LOS                     |
| 54 | Stratiki (2007)            | Single strain probiotics | 41  | <i>B. animalis</i> subsp. <i>lactis</i>                                                                                                                                                                              | until discharge            | Preterm Formula      | 36  | NA | - | - | - | - | - | - | - | ACM, NEC, LOS, TFF           |

|    |                    |                          |     |                                                                                                                  |                            |                      |     |    |   |   |   |   |   |   |   |                         |
|----|--------------------|--------------------------|-----|------------------------------------------------------------------------------------------------------------------|----------------------------|----------------------|-----|----|---|---|---|---|---|---|---|-------------------------|
| 55 | Tewari (2015)      | Single strain probiotics | 123 | <i>Bacillus clausii</i>                                                                                          | 6                          | Placebo              | 121 | NA | - | - | - | - | - | - | - | ACM, NEC, LOS, FIT      |
| 56 | Totsu (2014)       | Single strain probiotics | 153 | <i>B. bifidum</i>                                                                                                | until weight reach 2 kg    | Placebo              | 130 | NA | - | - | - | - | - | - | - | ACM, NEC, LOS, TFF, HOS |
| 57 | van Neikerk (2014) | Multi-strain probiotics  | 37  | <i>L. rhamnosus</i> ATCC 53103<br><i>B. longum</i> subsp. <i>infantis</i>                                        | 4                          | Placebo              | 37  | NA | - | - | - | - | - | - | - | ACM, NEC, NRM, LOS, TFF |
| 58 | van Neikerk (2015) | Multi-strain probiotics  | 54  | <i>L. rhamnosus</i> ATCC 53103<br><i>B. longum</i> subsp. <i>infantis</i>                                        | 4                          | Placebo              | 54  | NA | - | - | - | - | - | - | - | ACM, NEC, LOS, TFF      |
| 59 | Wejryd (2018)      | Single strain probiotics | 68  | <i>L. reuteri</i> DSM 17938                                                                                      | 4                          | Placebo              | 66  | NA | - | - | - | - | - | - | - | ACM, NEC, LOS, TFF      |
| 60 | Xiao-yuan (2007)   | Multi-strain probiotics  | 276 | <i>L. acidophilus</i><br><i>B. longum</i> subsp. <i>infantis</i><br><i>E. faecalis</i>                           | until discharge            | Control/No treatment | 248 | NA | - | - | - | - | - | - | - | ACM, NEC, LOS           |
| 61 | Xu (2016)          | Single strain probiotics | 51  | <i>S. boulardii</i>                                                                                              | 4/until discharge          | Control/No treatment | 49  | NA | - | - | - | - | - | - | - | NEC, LOS, HOS           |
| 62 | Yang (2011)        | Multi-strain probiotics  | 31  | <i>L. acidophilus</i><br><i>B. longum</i> subsp. <i>longum</i><br><i>E. faecalis</i>                             | Until full enteral feeding | Preterm Formula      | 31  | NA | - | - | - | - | - | - | - | ACM, NEC, TFF           |
| 63 | Zhou (2012)        | Multi-strain probiotics  | 75  | <i>L. acidophilus</i><br><i>B. longum</i> subsp. <i>infantis</i><br><i>E. faecalis</i><br><i>Bacillus cereus</i> | 1                          | Control/No treatment | 50  | NA | - | - | - | - | - | - | - | ACM, NEC                |

Footnote: n = number analyzed (as reported in study publication); wks = weeks

## Appendix 5: Networks of treatment comparisons

e-figure 1: Network of eligible comparisons for all-cause mortality

The size of the node corresponds to the number of infants randomized to that intervention. The interventions directly compared are linked with a line; the thickness of the line corresponds to the number of studies that assessed the comparison.

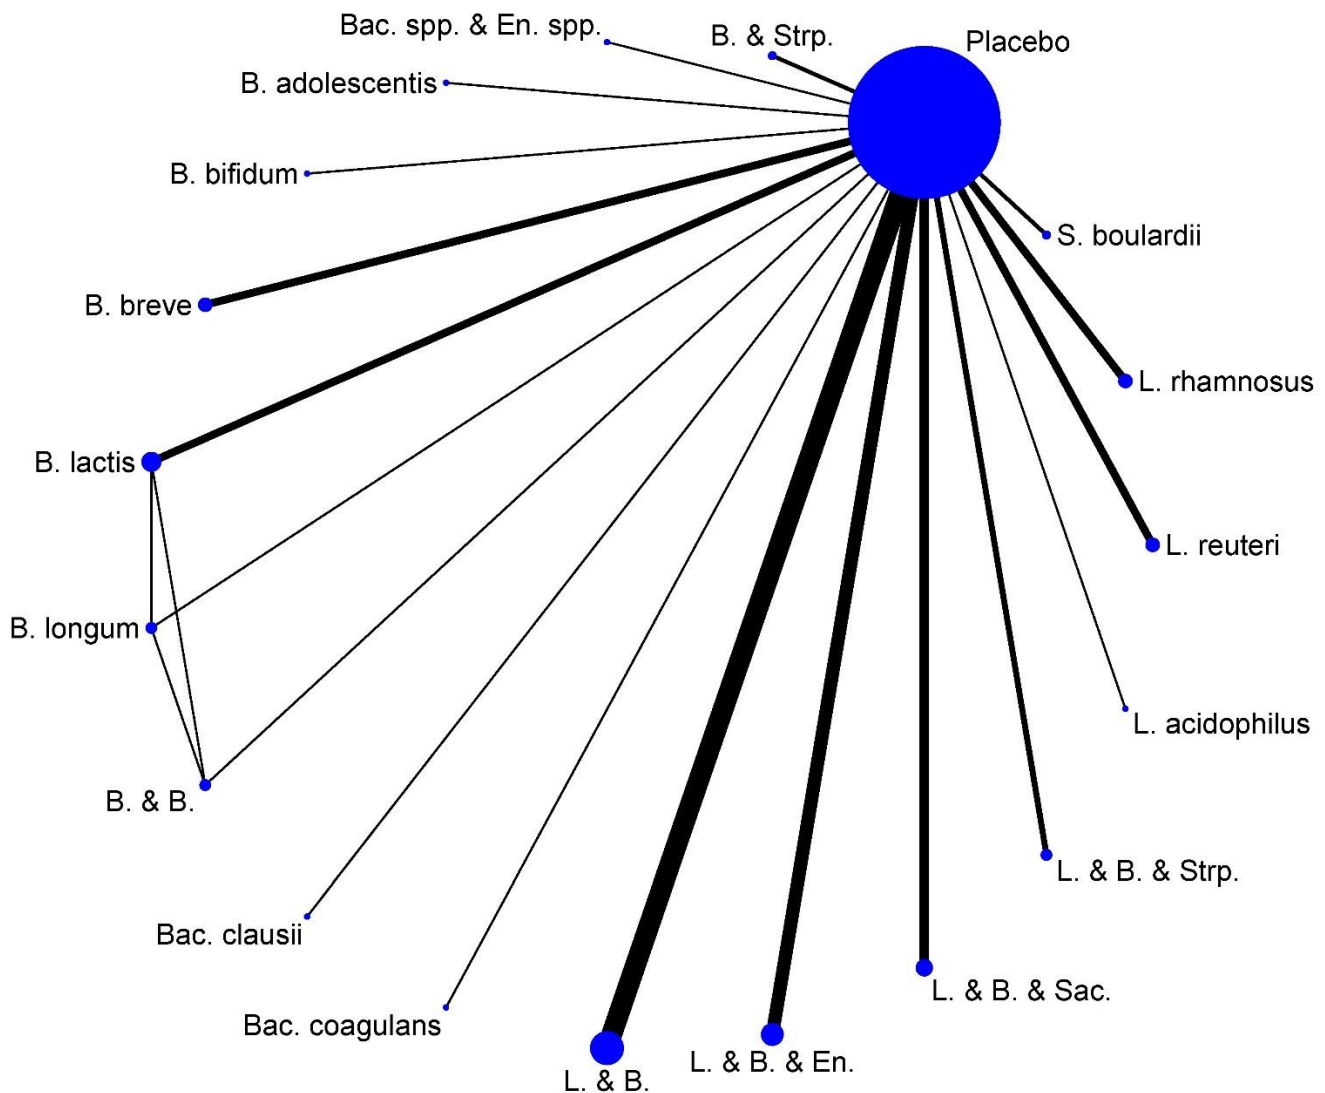

Footnote: Two of the seven studies included to construct the L. & B. & En. node included an additional bacterial genus and species, *Bacillus cereus*, that after running the analysis and assessment of heterogeneity we decided to merge into a single node. *B. adolescentis*: *Bifidobacterium adolescentis*; *B. & B.*: *Bifidobacterium animalis* subsp. *lactis* & *Bifidobacterium longum* subsp. *longum*; *B. coagulans*: *Bacillus coagulans*; *Bac & En.*: *Bacillus* spp. & *Enterococcus* spp.; *B. & Strp.*: *Bifidobacterium* spp. & *Streptococcus salivarius* subsp. *thermophilus*; *B. bifidum*: *Bifidobacterium bifidum*; *B. lactis*: *Bifidobacterium animalis* subsp. *lactis*; *B. longum*: *Bifidobacterium longum* subsp. *longum*; *B. breve*: *Bifidobacterium breve*; *B. clausii*: *Bacillus clausii*; *L. acidophilus*: *Lactobacillus acidophilus*; *L. & B.*: *Lactobacillus* spp. & *Bifidobacterium* spp.; *L. & B. & En.*: *Lactobacillus* spp. & *Bifidobacterium* spp. & *Enterococcus* spp.; *L. reuteri*: *Lactobacillus reuteri*; *L. & B. & Sac.*: *Lactobacillus* spp. & *Bifidobacterium* spp. & *Saccharomyces boulardii*; *L. & B. & Strp.*: *Lactobacillus* spp. & *Bifidobacterium* spp. & *S. salivarius* subsp. *thermophilus*; *L. rhamnosus*: *Lactobacillus rhamnosus*; *S. boulardii*: *Saccharomyces boulardii*

**e-figure 2: Network of eligible comparisons for severe NEC**

The size of the node corresponds to the number of infants randomized to that intervention. The interventions directly compared are linked with a line; the thickness of the line corresponds to the number of studies that assessed the comparison.

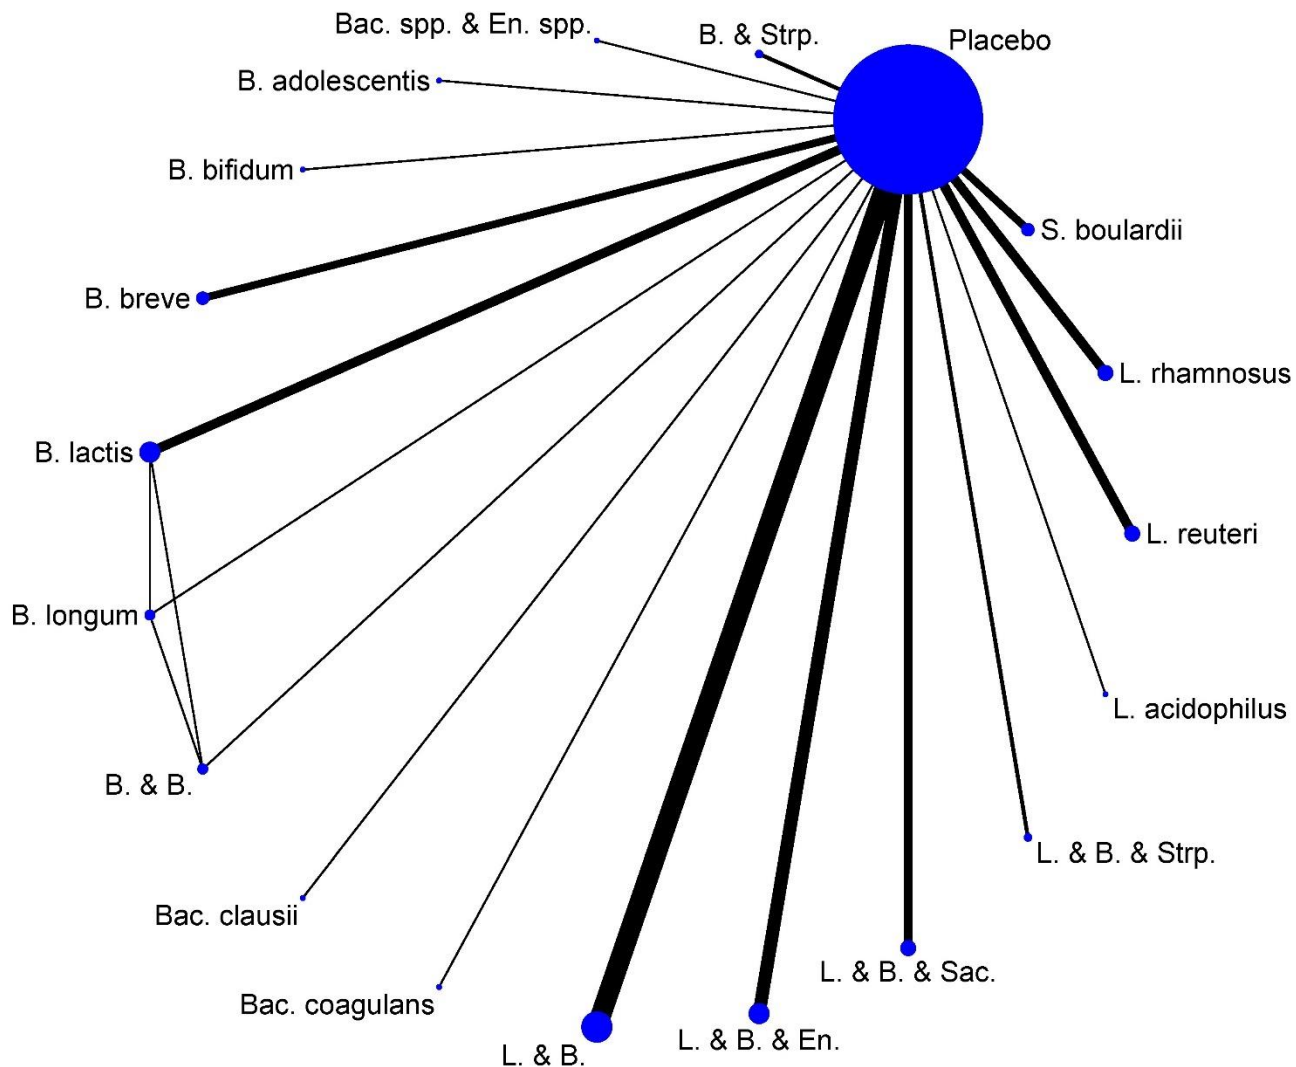

Footnote: Two of the seven studies included to construct the L. & B. & En. node included an additional bacterial genus and species, *Bacillus cereus*, that after running the analysis and assessment of heterogeneity we decided to merge into a single node. *B. adolescentis*: *Bifidobacterium adolescentis*; *B. & B.*: *Bifidobacterium animalis* subsp. *lactis* & *Bifidobacterium longum* subsp. *longum*; *Bac. coagulans*: *Bacillus coagulans*; *Bac & En.*: *Bacillus* spp. & *Enterococcus* spp.; *B. & Strp.*: *Bifidobacterium* spp. & *Streptococcus salivarius* subsp. *thermophilus*; *B. bifidum*: *Bifidobacterium bifidum*; *B. lactis*: *Bifidobacterium animalis* subsp. *lactis*; *B. longum*: *Bifidobacterium longum* subsp. *longum*; *B. breve*: *Bifidobacterium breve*; *B. clausii*: *Bacillus clausii*; *L. acidophilus*: *Lactobacillus acidophilus*; *L. & B.*: *Lactobacillus* spp. & *Bifidobacterium* spp.; *L. & B. & En.*: *Lactobacillus* spp. & *Bifidobacterium* spp. & *Enterococcus* spp.; *L. reuteri*: *Lactobacillus reuteri*; *L. & B. & Sac.*: *Lactobacillus* spp. & *Bifidobacterium* spp. & *Saccharomyces boulardii*; *L. & B. & Strp.*: *Lactobacillus* spp. & *Bifidobacterium* spp. & *S. salivarius* subsp. *thermophilus*; *L. rhamnosus*: *Lactobacillus rhamnosus*; *S. boulardii*: *Saccharomyces boulardii*

**e-figure 3: Network of eligible comparisons for late-onset sepsis**

The size of the node corresponds to the number of infants randomized to that intervention. The interventions directly compared are linked with a line; the thickness of the line corresponds to the number of studies that assessed the comparison.

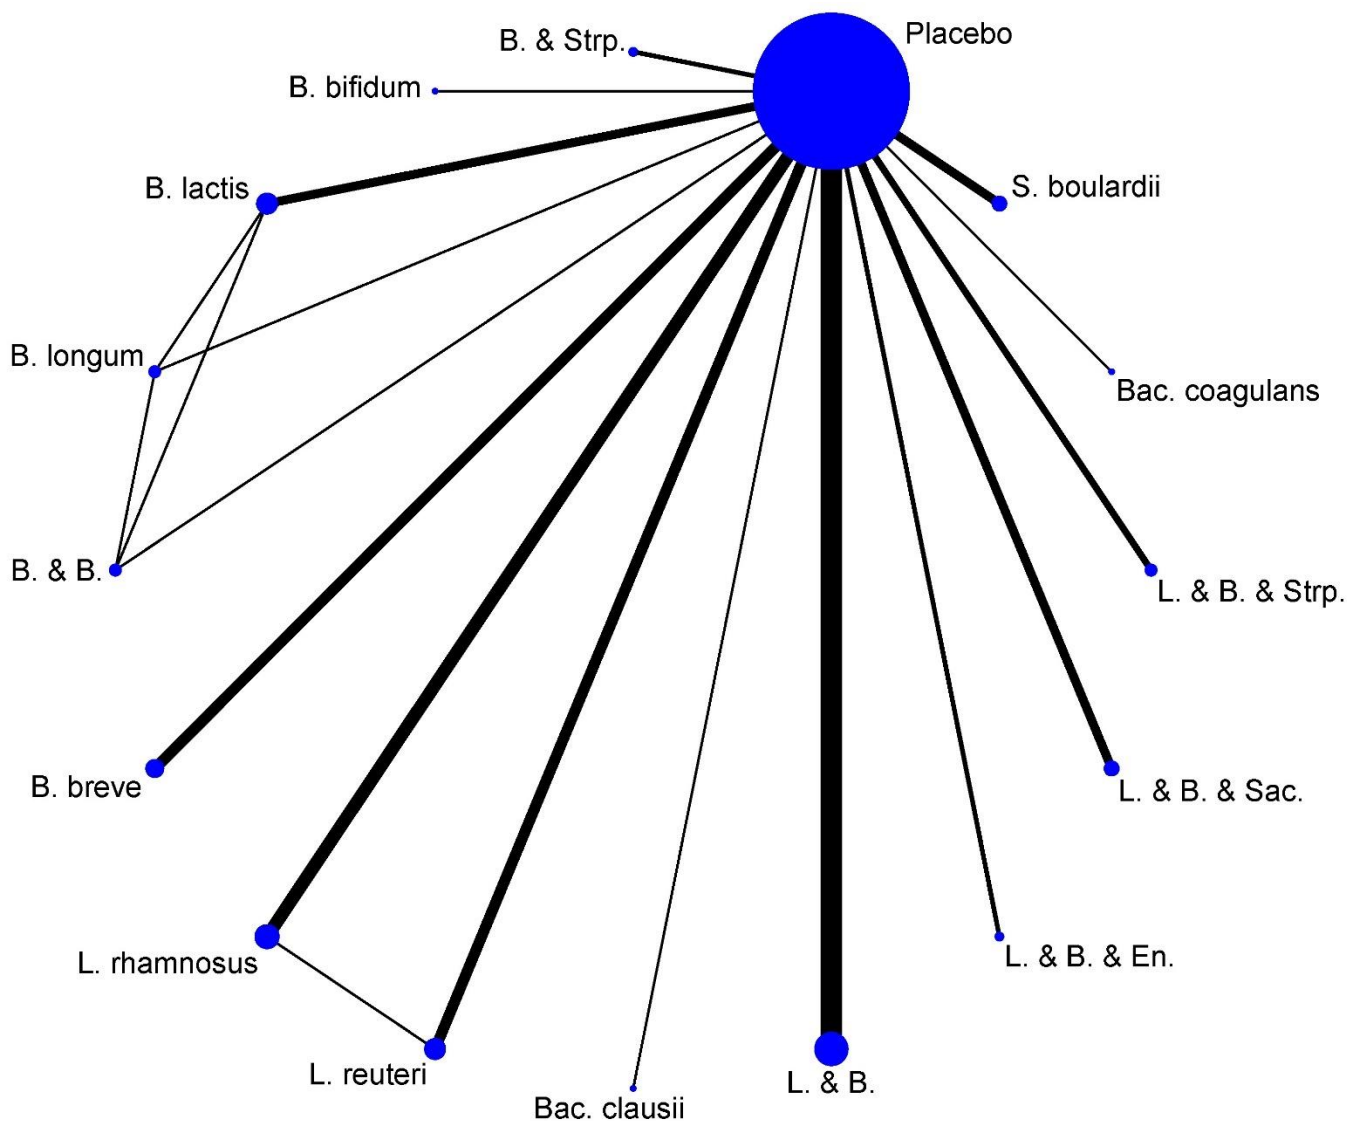

*B. & B.:* *Bifidobacterium animalis* subsp. *lactis* & *Bifidobacterium longum* subsp. *longum*; *Bac. coagulans:* *Bacillus coagulans*; *B. & Strp.:* *Bifidobacterium* spp. & *Streptococcus salivarius* subsp. *thermophilus*; *B. bifidum:* *Bifidobacterium bifidum*; *B. lactis:* *Bifidobacterium animalis* subsp. *lactis*; *B. longum:* *Bifidobacterium longum* subsp. *longum*; *B. breve:* *Bifidobacterium breve*; *Bac. clausii:* *Bacillus clausii*; *L. & B.:* *Lactobacillus* spp. & *Bifidobacterium* spp.; *L. & B. & En.:* *Lactobacillus* spp. & *Bifidobacterium* spp. & *Enterococcus* spp.; *L. reuteri:* *Lactobacillus reuteri*; *L. & B. & Sac.:* *Lactobacillus* spp. & *Bifidobacterium* spp. & *Saccharomyces boulardii*; *L. & B. & Strp.:* *Lactobacillus* spp. & *Bifidobacterium* spp. & *S. salivarius* subsp. *thermophilus*; *L. rhamnosus:* *Lactobacillus rhamnosus*; *S. boulardii:* *Saccharomyces boulardii*

**e-figure 4: Network of eligible comparisons for duration of time to reach full enteral feeding**

The size of the node corresponds to the number of infants randomized to that intervention. The interventions directly compared are linked with a line; the thickness of the line corresponds to the number of studies that assessed the comparison.

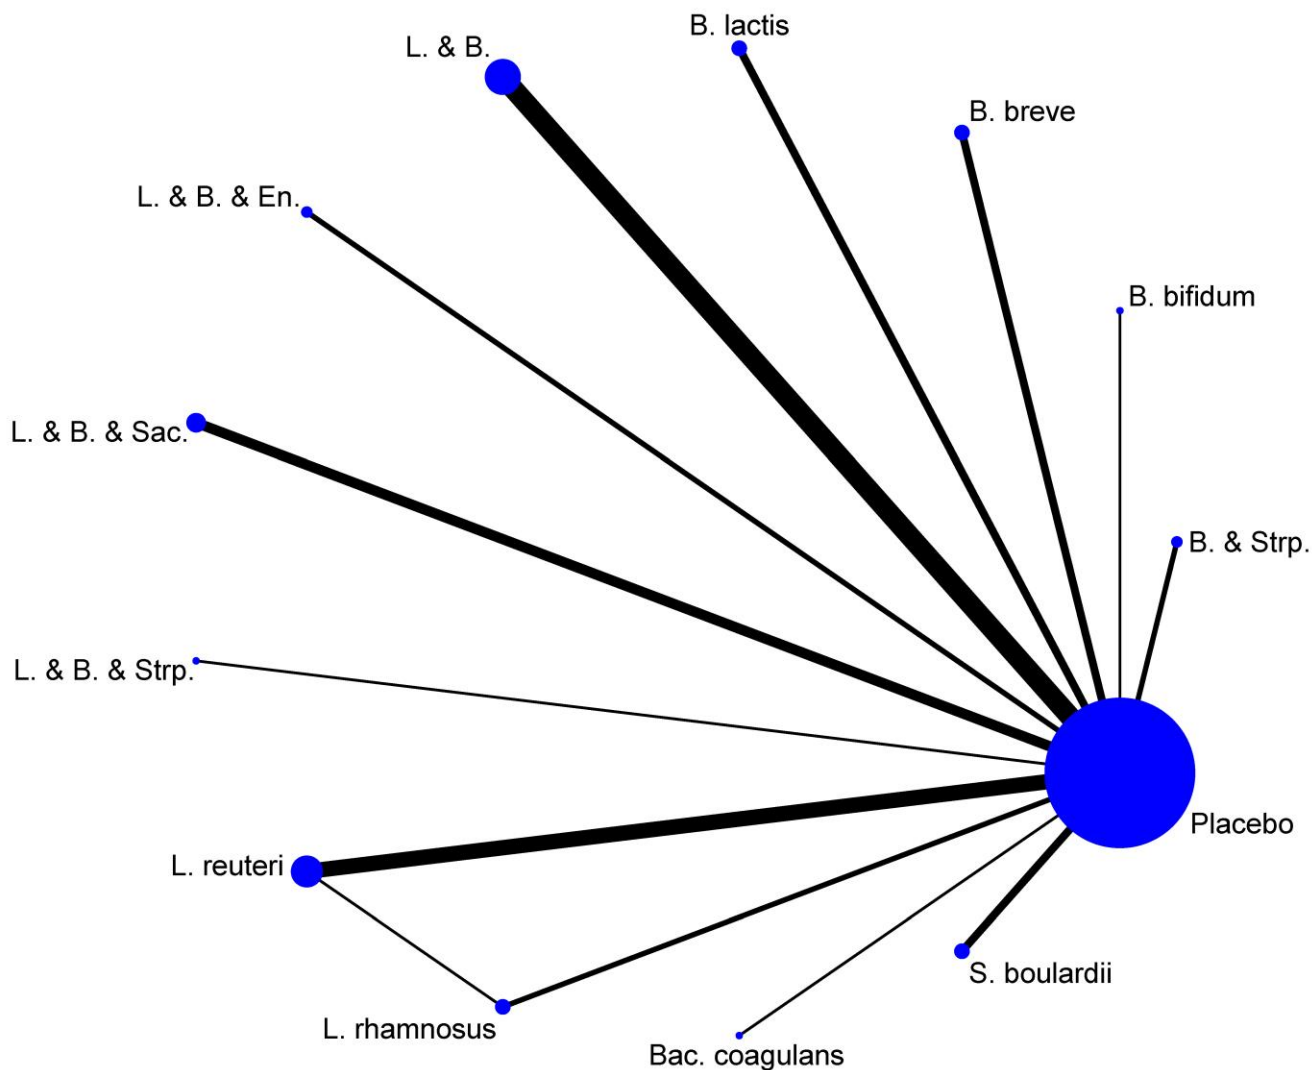

*Bac. coagulans*: *Bacillus coagulans*; *B. & Strp.*: *Bifidobacterium* spp. & *Streptococcus salivarius* subsp. *thermophilus*; *B. bifidum*: *Bifidobacterium bifidum*; *B. breve*: *Bifidobacterium breve*; *L. & B.*: *Lactobacillus* spp. & *Bifidobacterium* spp.; *L. reuteri*: *Lactobacillus reuteri*; *L. & B. & Sac.*: *Lactobacillus* spp. & *Bifidobacterium* spp. & *Saccharomyces boulardii*; *L. & B. & Strp.*: *Lactobacillus* spp. & *Bifidobacterium* spp. & *S. salivarius* subsp. *thermophilus*; *L. rhamnosus*: *Lactobacillus rhamnosus*; *S. boulardii*: *Saccharomyces boulardii*

**e-figure 5: Network of eligible comparisons for hospital stay**

The size of the node corresponds to the number of infants randomized to that intervention. The interventions directly compared are linked with a line; the thickness of the line corresponds to the number of studies that assessed the comparison.

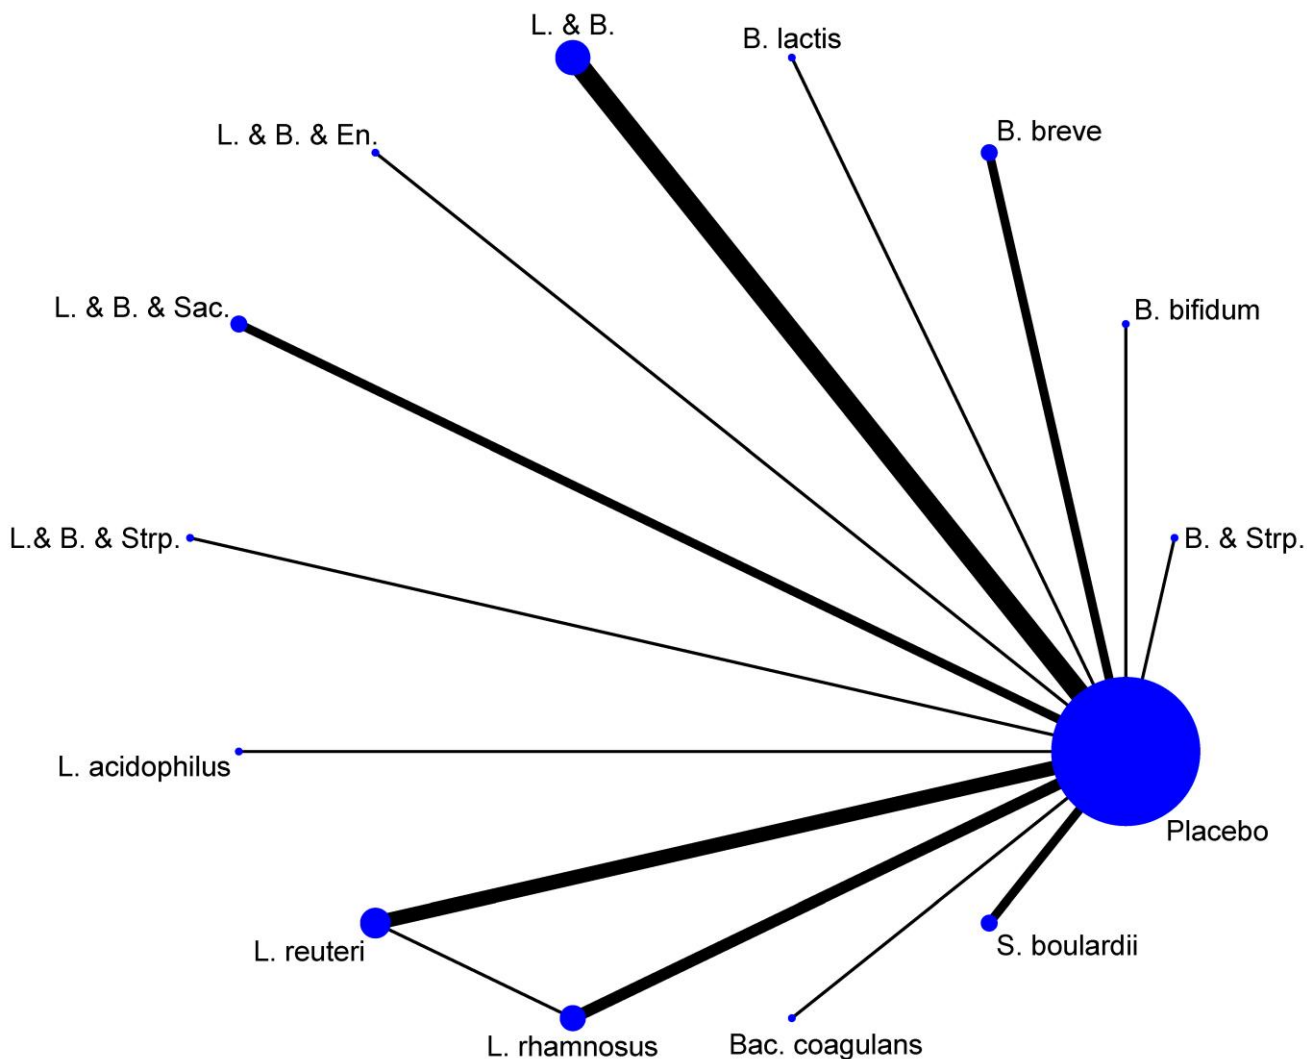

*Bac. coagulans*: *Bacillus coagulans*; *B. & Strp.*: *Bifidobacterium* spp. & *Streptococcus salivarius* subsp. *thermophilus*; *B. bifidum*: *Bifidobacterium bifidum*; *B. lactis*: *Bifidobacterium animalis* subsp. *lactis*; *B. breve*: *Bifidobacterium breve*; *L. & B.*: *Lactobacillus* spp. & *Bifidobacterium* spp.; *L. & B. & En.*: *Lactobacillus* spp. & *Bifidobacterium* spp. & *Enterococcus* spp.; *L. acidophilus*: *Lactobacillus acidophilus*; *L. reuteri*: *Lactobacillus reuteri*; *L. & B. & Sac.*: *Lactobacillus* spp. & *Bifidobacterium* spp. & *Saccharomyces boulardii*; *L. & B. & Strp.*: *Lactobacillus* spp. & *Bifidobacterium* spp. & *S. salivarius* subsp. *thermophilus*; *L. rhamnosus*: *Lactobacillus rhamnosus*; *S. boulardii*: *Saccharomyces boulardii*



## Appendix 6: Summary of risk of bias assessments for included trials

| Ref # | Study (year)                 | Sequence generation | Allocation concealment | Parents blinded | Health care providers blinded | Data collectors/ outcome assessors blinded | Missingness (> 5%: high) | Funding              |
|-------|------------------------------|---------------------|------------------------|-----------------|-------------------------------|--------------------------------------------|--------------------------|----------------------|
| 1     | Al-Hosni (2012)              | Low Risk            | Low Risk               | Low Risk        | Low Risk                      | Low Risk                                   | Low Risk                 | no funding statement |
| 2     | Arora (2017)                 | Low Risk            | High Risk              | High Risk       | High Risk                     | High Risk                                  | Low Risk                 | no funding           |
| 3     | Bin-Nun (2005)               | Low Risk            | High Risk              | Low Risk        | Low Risk                      | Low Risk                                   | Low Risk                 | non-industry         |
| 4     | Braga (2011)                 | Low Risk            | Low Risk               | Low Risk        | Low Risk                      | Low Risk                                   | Low Risk                 | no funding statement |
| 5     | Chowdhury (2016)             | High Risk           | High Risk              | High Risk       | High Risk                     | High Risk                                  | High Risk                | no funding statement |
| 6     | Chrzanowska-Lisiewska (2012) | Low Risk            | Low Risk               | Low Risk        | Low Risk                      | Low Risk                                   | Low Risk                 | no funding statement |
| 7     | Costalos (2003)              | Low Risk            | Low Risk               | Low Risk        | Low Risk                      | Low Risk                                   | Low Risk                 | no funding statement |
| 8     | Costeloe (2016)              | Low Risk            | Low Risk               | Low Risk        | Low Risk                      | Low Risk                                   | Low Risk                 | non-industry         |
| 9     | Dani (2002)                  | Low Risk            | Low Risk               | High Risk       | High Risk                     | Low Risk                                   | Low Risk                 | no funding statement |
| 10    | Dashti (2014)                | High Risk           | High Risk              | Low Risk        | Low Risk                      | High Risk                                  | Low Risk                 | no funding statement |
| 11    | Demirel (2013)               | Low Risk            | Low Risk               | Low Risk        | Low Risk                      | Low Risk                                   | Low Risk                 | no funding statement |
| 12    | Deng (2010)                  | High Risk           | High Risk              | High Risk       | High Risk                     | High Risk                                  | Low Risk                 | no funding           |
| 13    | Di (2010)                    | High Risk           | High Risk              | Low Risk        | Low Risk                      | High Risk                                  | Low Risk                 | no funding           |
| 14    | Dilli (2015)                 | Low Risk            | Low Risk               | Low Risk        | Low Risk                      | Low Risk                                   | Low Risk                 | no funding statement |
| 15    | Dongol Singh (2017)          | Low Risk            | Low Risk               | Low Risk        | Low Risk                      | Low Risk                                   | Low Risk                 | no funding statement |
| 16    | Dutta (2014)                 | Low Risk            | Low Risk               | Low Risk        | Low Risk                      | Low Risk                                   | Low Risk                 | any industry         |
| 17    | Fernández-Carrocerá (2013)   | Low Risk            | Low Risk               | Low Risk        | Low Risk                      | Low Risk                                   | Low Risk                 | no funding statement |
| 18    | Fujii (2006)                 | Low Risk            | Low Risk               | High Risk       | High Risk                     | High Risk                                  | Low Risk                 | non-industry         |
| 19    | Hariharan (2016)             | Low Risk            | High Risk              | High Risk       | High Risk                     | High Risk                                  | Low Risk                 | no funding statement |
| 20    | Hays (2016)                  | Low Risk            | Low Risk               | Low Risk        | Low Risk                      | Low Risk                                   | Low Risk                 | any industry         |
| 21    | Hernandez-Enriquez (2016)    | High Risk           | Low Risk               | High Risk       | High Risk                     | High Risk                                  | Low Risk                 | no funding statement |
| 22    | Hikaru (2010)                | Low Risk            | Low Risk               | Low Risk        | Low Risk                      | High Risk                                  | Low Risk                 | any industry         |
| 23    | Hua (2014)                   | Low Risk            | High Risk              | Low Risk        | Low Risk                      | High Risk                                  | Low Risk                 | non-industry         |
| 24    | Huang (2009)                 | High Risk           | High Risk              | High Risk       | High Risk                     | High Risk                                  | Low Risk                 | no funding           |
| 25    | Indrio (2017)                | Low Risk            | Low Risk               | Low Risk        | Low Risk                      | Low Risk                                   | Low Risk                 | any industry         |
| 26    | Jacobs (2013)                | Low Risk            | Low Risk               | Low Risk        | Low Risk                      | Low Risk                                   | Low Risk                 | non-industry         |
| 27    | Kanic (2015)                 | High Risk           | High Risk              | Low Risk        | High Risk                     | High Risk                                  | Low Risk                 | no funding statement |
| 28    | Ke (2008)                    | High Risk           | High Risk              | Low Risk        | Low Risk                      | High Risk                                  | Low Risk                 | no funding           |



|    |                            |           |           |           |           |           |           |                      |
|----|----------------------------|-----------|-----------|-----------|-----------|-----------|-----------|----------------------|
| 29 | Kitajima (1997)            | Low Risk  | High Risk | High Risk | High Risk | High Risk | Low Risk  | no funding statement |
| 30 | Lin (2005)                 | Low Risk  | non-industry         |
| 31 | Lin (2008)                 | Low Risk  | non-industry         |
| 32 | Manzoni (2014)             | Low Risk  | any industry         |
| 33 | Mihatsch (2010)            | Low Risk  | Low Risk  | Low Risk  | High Risk | High Risk | Low Risk  | no funding statement |
| 34 | Millar (1993)              | High Risk | High Risk | Low Risk  | Low Risk  | Low Risk  | Low Risk  | any industry         |
| 35 | Mohan (2008)               | Low Risk  | Low Risk  | Low Risk  | Low Risk  | High Risk | Low Risk  | any industry         |
| 36 | Oncel (2014)               | Low Risk  | no funding statement |
| 37 | Patole (2014)              | Low Risk  | non-industry         |
| 38 | Punnahitananda (2006)      | High Risk | Low Risk  | no funding statement |
| 39 | Qiao (2016)                | Low Risk  | no funding statement |
| 40 | Ren (2010)                 | Low Risk  | High Risk | High Risk | High Risk | High Risk | Low Risk  | no funding           |
| 41 | Reuman (1986)              | High Risk | High Risk | Low Risk  | Low Risk  | Low Risk  | Low Risk  | no funding statement |
| 42 | Rojas (2012)               | Low Risk  | non-industry         |
| 43 | Romeo (2011)               | Low Risk  | High Risk | High Risk | High Risk | High Risk | Low Risk  | no funding statement |
| 44 | Rouge (2009)               | Low Risk  | non-industry         |
| 45 | Roy (2014)                 | Low Risk  | no funding statement |
| 46 | Sadowska-Krawczenko (2012) | Low Risk  | no funding statement |
| 47 | Saengtawesin (2014)        | Low Risk  | Low Risk  | High Risk | High Risk | High Risk | Low Risk  | non-industry         |
| 48 | Samanta (2009)             | Low Risk  | High Risk | Low Risk  | Low Risk  | High Risk | Low Risk  | no funding statement |
| 49 | Sari (2011)                | Low Risk  | High Risk | no funding statement |
| 50 | Serce (2013)               | Low Risk  | any industry         |
| 51 | Shadkam (2015)             | Low Risk  | Low Risk  | Low Risk  | Low Risk  | High Risk | Low Risk  | non-industry         |
| 52 | Shashidhar (2017)          | Low Risk  | High Risk | no funding           |
| 53 | Sinha (2015)               | Low Risk  | non-industry         |
| 54 | Stratiki (2007)            | High Risk | Low Risk  | Low Risk  | Low Risk  | High Risk | High Risk | any industry         |
| 55 | Tewari (2015)              | Low Risk  | no funding statement |
| 56 | Totsu (2014)               | Low Risk  | Low Risk  | High Risk | Low Risk  | Low Risk  | High Risk | no funding           |
| 57 | van Neikerk (2014)         | Low Risk  | any industry         |
| 58 | van Neikerk (2015)         | Low Risk  | any industry         |
| 59 | Wejryd (2018)              | Low Risk  | non-industry         |
| 60 | Xiao-yuan (2007)           | High Risk | Low Risk  | no funding           |

|    |             |           |           |           |           |           |           |            |
|----|-------------|-----------|-----------|-----------|-----------|-----------|-----------|------------|
| 61 | Xu (2016)   | Low Risk  | High Risk | Low Risk  | Low Risk  | High Risk | High Risk | no funding |
| 62 | Yang (2011) | High Risk | Low Risk  | no funding |
| 63 | Zhou (2012) | High Risk | Low Risk  | no funding |

## Appendix 7: Results of the direct pairwise comparisons and GRADE assessments for all outcomes

e-Table 1: Results of direct pairwise comparisons with number trials and events for each trial arm and certainty of evidence (CoE) for all-cause mortality

| Comparison                                     | OR (95% CI)              | # trials | # events C 1 | n C 1 | # events C 2 | n C 2 | I <sup>2</sup> | P-bias* | GRADE CoE | Imprecision  | Indirectness | Inconsistency | Overall RoB  |
|------------------------------------------------|--------------------------|----------|--------------|-------|--------------|-------|----------------|---------|-----------|--------------|--------------|---------------|--------------|
| <i>S. boulardii</i> vs PLC                     | 1.01 (0.46, 2.23)        | 2        | 13           | 242   | 13           | 244   | 0.0            | -       | Moderate  | Serious      | Not serious  | Not serious   | Not serious  |
| <i>Bacillus coagulans</i> vs PLC               | 0.91 (0.38, 2.15)        | 1        | 11           | 121   | 12           | 121   | -              | -       | Low       | Serious      | Not serious  | Not serious   | Serious      |
| <i>L. rhamnosus</i> vs PLC                     | 0.84 (0.33, 2.12)        | 4        | 9            | 401   | 11           | 391   | 0.0            | -       | Moderate  | Serious      | Not serious  | Not serious   | Not serious  |
| <i>L. reuteri</i> vs PLC                       | 0.77 (0.51, 1.17)        | 4        | 43           | 670   | 55           | 674   | 0.0            | -       | Moderate  | Serious      | Not serious  | Not serious   | Not serious  |
| <i>L. acidophilus</i> vs PLC                   | 0.29 (0.03, 3.12)        | 1        | 1            | 15    | 3            | 15    | -              | -       | Low       | Very serious | Not serious  | Not serious   | Serious      |
| <i>L. &amp; B. &amp; Strp</i> vs PLC           | 0.40 (0.12, 1.30)        | 3        | 4            | 862   | 12           | 885   | 0.0            | -       | Moderate  | Serious      | Not serious  | Not serious   | Not serious  |
| <i>L. &amp; B. &amp; Sac</i> vs PLC            | 1.05 (0.51, 2.17)        | 5        | 21           | 399   | 16           | 328   | 0.0            | -       | Low       | Serious      | Not serious  | Not serious   | Serious      |
| <i>L. &amp; B. &amp; En</i> vs PLC             | 0.78 (0.23, 2.62)        | 7        | 2            | 1003  | 3            | 947   | 0.0            | -       | Very Low  | Very serious | Not serious  | Not serious   | Very serious |
| <i>L. &amp; B.</i> vs PLC                      | <b>0.56 (0.39, 0.80)</b> | 11       | 59           | 976   | 101          | 984   | 0.0            | 0.697   | High      | Not serious  | Not serious  | Not serious   | Not serious  |
| <i>B. longum</i> subsp. <i>longum</i> vs PLC   | 2.22 (0.19, 25.27)       | 1        | 2            | 48    | 1            | 52    | -              | -       | Moderate  | Very serious | Not serious  | Not serious   | Not serious  |
| <i>B. animalis</i> subsp. <i>lactis</i> vs PLC | 0.52 (0.13, 2.08)        | 4        | 7            | 282   | 17           | 277   | 38.5           | -       | Moderate  | Serious      | Not serious  | Serious       | Not serious  |
| <i>Bac. clausii</i> vs PLC                     | 0.83 (0.37, 1.87)        | 1        | 12           | 123   | 14           | 121   | -              | -       | Moderate  | Serious      | Not serious  | Not serious   | Not serious  |
| <i>B. breve</i> vs PLC                         | 0.75 (0.34, 1.68)        | 4        | 54           | 880   | 62           | 882   | 10.5           | -       | Moderate  | Serious      | Not serious  | Not serious   | Not serious  |
| <i>B. bifidum</i> vs PLC                       | 4.31 (0.20, 90.52)       | 1        | 2            | 153   | 0            | 130   | -              | -       | Low       | Very serious | Not serious  | Not serious   | Serious      |
| <i>B. adolescentis</i> vs PLC                  | 0.93 (0.02, 47.20)       | 1        | 0            | 95    | 0            | 88    | -              | -       | Very Low  | Very serious | Not serious  | Not serious   | Very serious |
| <i>Bac &amp; Ent</i> vs PLC                    | 0.95 (0.02, 48.18)       | 1        | 0            | 182   | 0            | 174   | -              | -       | Very Low  | Very serious | Not serious  | Not serious   | Very serious |
| <i>B. &amp; Strp.</i> vs PLC                   | 0.72 (0.29, 1.77)        | 2        | 30           | 620   | 36           | 624   | 44.5           | -       | Low       | Serious      | Not serious  | Serious       | Not serious  |
| <i>B. &amp; B.</i> vs PLC                      | 1.11 (0.07, 18.24)       | 1        | 1            | 47    | 1            | 52    | -              | -       | Moderate  | Very serious | Not serious  | Not serious   | Not serious  |

|                                                                                                             |                      |   |   |    |   |    |   |   |          |                 |             |             |             |
|-------------------------------------------------------------------------------------------------------------|----------------------|---|---|----|---|----|---|---|----------|-----------------|-------------|-------------|-------------|
| <b><i>B. &amp; B. vs B. longum</i></b><br><b>subsp. <i>longum</i></b>                                       | 0.50 (0.04,<br>5.56) | 1 | 1 | 47 | 2 | 48 | - | - | Moderate | Very<br>serious | Not serious | Not serious | Not serious |
| <b><i>B. &amp; B. vs B. animalis</i></b><br><b>subsp. <i>lactis</i></b>                                     | 0.52 (0.05,<br>5.88) | 1 | 1 | 47 | 2 | 50 | - | - | Moderate | Very<br>serious | Not serious | Not serious | Not serious |
| <b><i>B. animalis</i> subsp.</b><br><b><i>lactis</i> vs <i>B. longum</i></b><br><b>subsp. <i>longum</i></b> | 0.96 (0.13,<br>7.09) | 1 | 2 | 50 | 2 | 48 | - | - | Moderate | Very<br>serious | Not serious | Not serious | Not serious |

\*P-value of Harbord's test for small-study effects. Footnotes: Results are Odds Ratio (95% CIs) from DerSimonian and Laird random-effects meta-analysis. Numbers underlined in bold represent statistically significant results. "n" is number of infants randomized to each arm. C = comparison; RoB = overall risk of bias. Two of the seven studies included to construct the L. & B. & En. node included an additional bacterial genus and species, *Bacillus cereus*, that after running the analysis and assessment of heterogeneity we decided to merge into a single node. *B. adolescentis*: *Bifidobacterium adolescentis*; *B. & B.*: *Bifidobacterium animalis* subsp. *lactis* & *Bifidobacterium longum* subsp. *longum*; *Bac. coagulans*: *Bacillus coagulans*; *Bac & En.*: *Bacillus* spp. & *Enterococcus* spp.; *B. & Strp.*: *Bifidobacterium* spp. & *Streptococcus salivarius* subsp. *thermophilus*; *B. bifidum*: *Bifidobacterium bifidum*; *B. lactis*: *Bifidobacterium animalis* subsp. *lactis*; *B. longum*: *Bifidobacterium longum* subsp. *longum*; *B. breve*: *Bifidobacterium breve*; *B. clausii*: *Bacillus clausii*; *L. acidophilus*: *Lactobacillus acidophilus*; *L. & B.*: *Lactobacillus* spp. & *Bifidobacterium* spp.; *L. & B. & En.*: *Lactobacillus* spp. & *Bifidobacterium* spp. & *Enterococcus* spp.; *L. reuteri*: *Lactobacillus reuteri*; *L. & B. & Sac.*: *Lactobacillus* spp. & *Bifidobacterium* spp. & *Saccharomyces boulardii*; *L. & B. & Strp.*: *Lactobacillus* spp. & *Bifidobacterium* spp. & *S. salivarius* subsp. *thermophilus*; *L. rhamnosus*: *Lactobacillus rhamnosus*; *S. boulardii*: *Saccharomyces boulardii*

e-Table 2: Results of direct pairwise comparisons with number trials and events for each trial arm and certainty of evidence (CoE) for severe NEC

| Comparison                                                    | OR (95% CI)                     | # trials | # events C 1 | n C 1 | # events C 2 | n C 2 | I <sup>2</sup> | P-bias* | GRADE CoE | Imprecision  | Indirectness | Inconsistency | Overall RoB  |
|---------------------------------------------------------------|---------------------------------|----------|--------------|-------|--------------|-------|----------------|---------|-----------|--------------|--------------|---------------|--------------|
| <i>S. boulardii</i> vs PLC                                    | 0.81 (0.42, 1.55)               | 4        | 18           | 341   | 20           | 325   | 0.0            | -       | Moderate  | Serious      | Not serious  | Not serious   | Not serious  |
| <i>Bacillus coagulans</i> vs PLC                              | 0.58 (0.20, 1.65)               | 1        | 6            | 121   | 10           | 121   | -              | -       | Moderate  | Serious      | Not serious  | Not serious   | Serious      |
| <i>L. rhamnosus</i> vs PLC                                    | <b><u>0.44 (0.21, 0.90)</u></b> | 5        | 12           | 422   | 25           | 417   | 0.0            | -       | Moderate  | Serious      | Not serious  | Not serious   | Not serious  |
| <i>L. reuteri</i> vs PLC                                      | <b><u>0.51 (0.26, 0.98)</u></b> | 5        | 27           | 694   | 49           | 694   | 34.5           | -       | Moderate  | Not serious  | Not serious  | Not serious   | Serious      |
| <i>L. acidophilus</i> vs PLC                                  | 1.00 (0.02, 53.66)              | 1        | 0            | 15    | 0            | 15    | -              | -       | Very low  | Very serious | Not serious  | Not serious   | Serious      |
| <i>L. &amp; B. &amp; Strp</i> vs PLC                          | 0.42 (0.16, 1.13)               | 2        | 6            | 194   | 14           | 213   | 0.0            | -       | Moderate  | Serious      | Not serious  | Not serious   | Serious      |
| <i>L. &amp; B. &amp; Sac</i> vs PLC                           | 0.74 (0.25, 2.19)               | 5        | 13           | 399   | 14           | 328   | 21.0           | -       | Low       | Serious      | Not serious  | Not serious   | Serious      |
| <i>L. &amp; B. &amp; En</i> vs PLC                            | <b><u>0.28 (0.16, 0.49)</u></b> | 7        | 18           | 1003  | 60           | 947   | 0.0            | -       | Low       | Not serious  | Not serious  | Not serious   | Very serious |
| <i>L. &amp; B.</i> vs PLC                                     | <b><u>0.35 (0.20, 0.59)</u></b> | 11       | 19           | 937   | 59           | 941   | 0.0            | 0.597   | High      | Not serious  | Not serious  | Not serious   | Not serious  |
| <i>B. longum</i> subsp. <i>longum</i> vs PLC                  | 0.35 (0.03, 3.46)               | 1        | 1            | 48    | 3            | 52    | -              | -       | Low       | Very serious | Not serious  | Not serious   | Not serious  |
| <i>B. animalis</i> subsp. <i>lactis</i> vs PLC                | <b><u>0.34 (0.11, 1.00)</u></b> | 5        | 8            | 319   | 29           | 309   | 33.1           | -       | Moderate  | Serious      | Not serious  | Not serious   | Serious      |
| <i>B. clausii</i> vs PLC                                      | 0.98 (0.14, 7.10)               | 1        | 2            | 123   | 2            | 121   | -              | -       | Low       | Very serious | Not serious  | Not serious   | Not serious  |
| <i>B. breve</i> vs PLC                                        | 0.92 (0.64, 1.32)               | 4        | 61           | 785   | 67           | 794   | 0.0            | -       | Moderate  | Serious      | Not serious  | Not serious   | Not serious  |
| <i>B. bifidum</i> vs PLC                                      | 0.85 (0.02, 43.14)              | 1        | 0            | 153   | 0            | 131   | -              | -       | Very low  | Very serious | Not serious  | Not serious   | Serious      |
| <i>B. adolescentis</i> vs PLC                                 | 0.13 (0.01, 2.51)               | 1        | 0            | 95    | 3            | 88    | -              | -       | Very low  | Very serious | Not serious  | Not serious   | Serious      |
| <i>Bac &amp; Ent</i> vs PLC                                   | <b><u>0.23 (0.08, 0.63)</u></b> | 1        | 5            | 182   | 19           | 173   | -              | -       | Moderate  | Serious      | Not serious  | Not serious   | Serious      |
| <i>B. &amp; Strp</i> vs PLC                                   | 0.27 (0.06, 1.21)               | 2        | 12           | 620   | 34           | 624   | 53.6           | -       | Low       | Serious      | Not serious  | Serious       | Serious      |
| <i>B. &amp; B.</i> vs PLC                                     | 1.94 (0.44, 8.62)               | 1        | 5            | 47    | 3            | 52    | -              | -       | Low       | Very serious | Not serious  | Not serious   | Not serious  |
| <i>B. &amp; B.</i> vs <i>B. longum</i> subsp. <i>longum</i>   | 5.11 (0.57, 45.37)              | 1        | 5            | 47    | 1            | 48    | -              | -       | Low       | Very serious | Not serious  | Not serious   | Not serious  |
| <i>B. &amp; B.</i> vs <i>B. animalis</i> subsp. <i>lactis</i> | 2.86 (0.53, 15.50)              | 1        | 5            | 47    | 2            | 50    | -              | -       | Low       | Very serious | Not serious  | Not serious   | Not serious  |

|                                                                                                 |                       |   |   |    |   |    |   |   |     |              |             |             |             |
|-------------------------------------------------------------------------------------------------|-----------------------|---|---|----|---|----|---|---|-----|--------------|-------------|-------------|-------------|
| <b><i>B. animalis</i> subsp. <i>lactis</i><br/>vs <i>B. longum</i> subsp.<br/><i>longum</i></b> | 1.96 (0.17,<br>22.33) | 1 | 2 | 50 | 1 | 48 | - | - | Low | Very serious | Not serious | Not serious | Not serious |
|-------------------------------------------------------------------------------------------------|-----------------------|---|---|----|---|----|---|---|-----|--------------|-------------|-------------|-------------|

\*P-value of Harbord's test for small-study effects. Footnotes: Results are Odds Ratio (95% CIs) from DerSimonian and Laird random-effects meta-analysis. Numbers underlined in bold represent statistically significant results. "n" is number of infants randomized to each arm. C = comparison; RoB = overall risk of bias. Two of the seven studies included to construct the L. & B. & En. node included an additional bacterial genus and species, *Bacillus cereus*, that after running the analysis and assessment of heterogeneity we decided to merge into a single node. *B. adolescentis*: *Bifidobacterium adolescentis*; *B. & B.*: *Bifidobacterium animalis* subsp. *lactis* & *Bifidobacterium longum* subsp. *longum*; *Bac. coagulans*: *Bacillus coagulans*; *Bac & En.*: *Bacillus* spp. & *Enterococcus* spp.; *B. & Strp.*: *Bifidobacterium* spp. & *Streptococcus salivarius* subsp. *thermophilus*; *B. bifidum*: *Bifidobacterium bifidum*; *B. animalis* subsp. *lactis*: *Bifidobacterium animalis* subsp. *lactis*; *B. longum*: *Bifidobacterium longum* subsp. *longum*; *B. breve*: *Bifidobacterium breve*; *B. clausii*: *Bacillus clausii*; *L. acidophilus*: *Lactobacillus acidophilus*; *L. & B.*: *Lactobacillus* spp. & *Bifidobacterium* spp.; *L. & B. & En.*: *Lactobacillus* spp. & *Bifidobacterium* spp. & *Enterococcus* spp.; *L. reuteri*: *Lactobacillus reuteri*; *L. & B. & Sac.*: *Lactobacillus* spp. & *Bifidobacterium* spp. & *Saccharomyces boulardii*; *L. & B. & Strp.*: *Lactobacillus* spp. & *Bifidobacterium* spp. & *S. salivarius* subsp. *thermophilus*; *L. rhamnosus*: *Lactobacillus rhamnosus*; *S. boulardii*: *Saccharomyces boulardii*

**e-Table 3: Results of direct pairwise comparisons with number trials and events for each trial arm and certainty of evidence (CoE) for culture proven sepsis**

| Comparison                                                                       | OR (95% CI)       | # trials | # events C 1 | n C 1 | # events C 2 | n C 2 | I <sup>2</sup> | P-bias* | GRADE CoE | Imprecision  | Indirectness | Inconsistency | Overall RoB |
|----------------------------------------------------------------------------------|-------------------|----------|--------------|-------|--------------|-------|----------------|---------|-----------|--------------|--------------|---------------|-------------|
| <i>S. boulardii</i> vs PLC                                                       | 0.79 (0.51, 1.21) | 4        | 46           | 341   | 55           | 325   | 0.0            | -       | Moderate  | Serious      | Not serious  | Not serious   | Not serious |
| <i>Bacillus coagulans</i> vs PLC                                                 | 1.15 (0.63, 2.10) | 1        | 29           | 121   | 26           | 121   | -              | -       | Moderate  | Serious      | Not serious  | Not serious   | Serious     |
| <i>L. rhamnosus</i> vs PLC                                                       | 0.86 (0.53, 1.38) | 6        | 46           | 478   | 53           | 475   | 0.0            | -       | Moderate  | Serious      | Not serious  | Not serious   | Not serious |
| <i>L. reuteri</i> vs PLC                                                         | 0.64 (0.32, 1.31) | 5        | 67           | 753   | 84           | 757   | 66.9           | -       | Low       | Serious      | Not serious  | Serious       | Serious     |
| <i>L. &amp; B. &amp; Strp</i> vs PLC                                             | 0.71 (0.50, 1.01) | 3        | 82           | 862   | 106          | 885   | 0.0            | -       | Moderate  | Serious      | Not serious  | Not serious   | Serious     |
| <i>L. &amp; B. &amp; Sac</i> vs PLC                                              | 0.46 (0.16, 1.27) | 4        | 66           | 351   | 83           | 280   | 76.7           | -       | Low       | Serious      | Not serious  | Serious       | Serious     |
| <i>L. &amp; B. &amp; En</i> vs PLC                                               | 0.44 (0.14, 1.31) | 2        | 23           | 316   | 37           | 288   | 60.2           | -       | Low       | Serious      | Not serious  | Serious       | Serious     |
| <i>L. &amp; B.</i> vs PLC                                                        | 0.87 (0.60, 1.28) | 10       | 191          | 885   | 212          | 891   | 54.7           | 0.655   | Moderate  | Not serious  | Not serious  | Serious       | Serious     |
| <i>B. longum</i> subsp. <i>longum</i> vs PLC                                     | 0.84 (0.30, 2.34) | 1        | 8            | 48    | 10           | 52    | -              | -       | Low       | Very serious | Not serious  | Not serious   | Not serious |
| <i>B. animalis</i> subsp. <i>lactis</i> vs PLC                                   | 0.79 (0.50, 1.24) | 4        | 45           | 282   | 55           | 277   | 0.0            | -       | Low       | Serious      | Not serious  | Not serious   | Serious     |
| <i>Bac. clausii</i> vs PLC                                                       | 0.70 (0.27, 1.79) | 1        | 8            | 123   | 11           | 121   | -              | -       | Moderate  | Serious      | Not serious  | Not serious   | Not serious |
| <i>B. breve</i> vs PLC                                                           | 0.87 (0.49, 1.53) | 5        | 102          | 893   | 112          | 894   | 45.8           | -       | Low       | Serious      | Not serious  | Serious       | Serious     |
| <i>B. bifidum</i> vs PLC                                                         | 0.49 (0.17, 1.39) | 1        | 6            | 153   | 10           | 130   | -              | -       | Low       | Serious      | Not serious  | Not serious   | Serious     |
| <i>B. &amp; Strp</i> vs PLC                                                      | 1.03 (0.54, 1.97) | 2        | 103          | 620   | 113          | 624   | 67.6           | -       | Low       | Serious      | Not serious  | Serious       | Serious     |
| <i>B. &amp; B.</i> vs PLC                                                        | 0.86 (0.31, 2.41) | 1        | 8            | 47    | 10           | 52    | -              | -       | Low       | Very serious | Not serious  | Not serious   | Not serious |
| <i>B. &amp; B.</i> vs <i>B. longum</i> subsp. <i>longum</i>                      | 1.02 (0.35, 2.94) | 1        | 8            | 48    | 8            | 47    | -              | -       | Low       | Very serious | Not serious  | Not serious   | Not serious |
| <i>B. &amp; B.</i> vs <i>B. animalis</i> subsp. <i>lactis</i>                    | 0.95 (0.34, 2.65) | 1        | 8            | 47    | 9            | 50    | -              | -       | Low       | Very serious | Not serious  | Not serious   | Not serious |
| <i>B. animalis</i> subsp. <i>lactis</i> vs <i>B. longum</i> subsp. <i>longum</i> | 1.10 (0.39, 3.13) | 1        | 9            | 50    | 8            | 48    | -              | -       | Low       | Very serious | Not serious  | Not serious   | Not serious |
| <i>L. reuteri</i> vs <i>L. rhamnosus</i>                                         | 0.49 (0.04, 5.55) | 1        | 1            | 83    | 2            | 83    | -              | -       | Very low  | Very serious | Not serious  | Not serious   | Serious     |

\*P-value of Harbord's test for small-study effects. Footnote: Results are Odds Ratio (95% CIs) from DerSimonian and Laird random-effects meta-analysis. Numbers underlined in bold represent statistically significant results. "n" is number of infants randomized to each arm. C = comparison; RoB = overall risk of bias; PLC = Placebo. *B. & B.*: *Bifidobacterium animalis* subsp. *lactis* & *Bifidobacterium longum* subsp. *longum*; *Bac. coagulans*: *Bacillus coagulans*; *B. & Strp.*: *Bifidobacterium* spp. & *Streptococcus salivarius* subsp. *thermophilus*; *B. bifidum*: *Bifidobacterium bifidum*; *B. animalis* subsp. *lactis*: *Bifidobacterium animalis* subsp. *lactis*; *B. longum*: *Bifidobacterium longum* subsp. *longum*; *B. breve*: *Bifidobacterium breve*; *B. clausii*: *Bacillus clausii*; *L. & B.*: *Lactobacillus* spp. & *Bifidobacterium* spp.; *L. & B. & En.*: *Lactobacillus* spp. & *Bifidobacterium* spp. & *Enterococcus* spp.; *L. reuteri*: *Lactobacillus reuteri*; *L. & B. & Sac.*: *Lactobacillus* spp. & *Bifidobacterium* spp. & *Saccharomyces boulardii*; *L. & B. & Strp.*: *Lactobacillus* spp. & *Bifidobacterium* spp. & *S. salivarius* subsp. *thermophilus*; *L. rhamnosus*: *Lactobacillus rhamnosus*; *S. boulardii*: *Saccharomyces boulardii*



e-Table 4: Results of direct pairwise comparisons with number trials and events for each trial arm and certainty of evidence (CoE) feed intolerance

| Comparison                                     | OR (95% CI)                     | # trials | # events C 1 | n C 1 | # events C 2 | n C 2 | I <sup>2</sup> | P-bias* | GRADE CoE | Imprecision  | Indirectness | Inconsistency | Overall RoB |
|------------------------------------------------|---------------------------------|----------|--------------|-------|--------------|-------|----------------|---------|-----------|--------------|--------------|---------------|-------------|
| <i>S. boulardii</i> vs PLC                     | 0.42 (0.18, 1.00)               | 2        | 33           | 186   | 64           | 172   | 26.0           | -       | Moderate  | Serious      | Not serious  | Not serious   | Not serious |
| <i>Bacillus coagulans</i> vs PLC               | <b><u>0.47 (0.27, 0.81)</u></b> | 1        | 49           | 110   | 70           | 111   | -              | -       | Low       | Serious      | Not serious  | Not serious   | Serious     |
| <i>L. rhamnosus</i> vs PLC                     | 0.47 (0.10, 2.26)               | 2        | 29           | 98    | 39           | 96    | 35.8           | -       | Low       | Serious      | Not serious  | Not serious   | Serious     |
| <i>L. reuteri</i> vs PLC                       | <b><u>0.32 (0.12, 0.89)</u></b> | 3        | 85           | 655   | 155          | 661   | 87.2           | -       | Low       | Serious      | Not serious  | Serious       | Serious     |
| <i>L. &amp; B. &amp; Strp</i> vs PLC           | 0.68 (0.33, 1.43)               | 1        | 13           | 119   | 21           | 138   | -              | -       | Low       | Serious      | Not serious  | Not serious   | Serious     |
| <i>L. &amp; B. &amp; Sac</i> vs PLC            | <b><u>0.47 (0.26, 0.83)</u></b> | 1        | 35           | 93    | 58           | 103   | -              | -       | Moderate  | Not serious  | Not serious  | Not serious   | Serious     |
| <i>L. &amp; B. &amp; En</i> vs PLC             | 0.23 (0.07, 0.76)               | 1        | 5            | 30    | 14           | 30    | -              | -       | Moderate  | Serious      | Not serious  | Not serious   | Not serious |
| <i>B. animalis</i> subsp. <i>lactis</i> vs PLC | <b><u>0.10 (0.01, 0.82)</u></b> | 1        | 1            | 100   | 9            | 100   | -              | -       | Moderate  | Serious      | Not serious  | Not serious   | Not serious |
| <i>Bac. clausii</i> vs PLC                     | 0.81 (0.24, 2.74)               | 1        | 5            | 123   | 6            | 121   | -              | -       | Moderate  | Serious      | Not serious  | Not serious   | Not serious |
| <i>L. reuteri</i> vs <i>L. rhamnosus</i>       | 0.07 (0.02, 0.24)               | 1        | 3            | 83    | 29           | 83    | -              | -       | Very low  | Very serious | Not serious  | Not serious   | Serious     |

\* P value of Harbord's test for small-study effects. Footnote: Results are Odds Ratio (95% CIs) from DerSimonian and Laird random-effects meta-analysis. Numbers underlined in bold represent statistically significant results. "n" is number of infants randomized to each arm. C = comparison; RoB = overall risk of bias; PLC = Placebo. *B. adolescentis*: *Bifidobacterium adolescentis*; *B. & B.*: *Bifidobacterium animalis* subsp. *lactis* & *Bifidobacterium longum* subsp. *longum*; *Bac. coagulans*: *Bacillus coagulans*; *Bac & En.*: *Bacillus* spp. & *Enterococcus* spp.; *B. & Strp.*: *Bifidobacterium* spp. & *Streptococcus salivarius* subsp. *thermophilus*; *B. bifidum*: *Bifidobacterium bifidum*; *B. animalis* subsp. *lactis*: *Bifidobacterium animalis* subsp. *lactis*; *B. longum*: *Bifidobacterium longum* subsp. *longum*; *B. breve*: *Bifidobacterium breve*; *B. clausii*: *Bacillus clausii*; *L. acidophilus*: *Lactobacillus acidophilus*; *L. & B.*: *Lactobacillus* spp. & *Bifidobacterium* spp.; *L. & B. & En.*: *Lactobacillus* spp. & *Bifidobacterium* spp. & *Enterococcus* spp.; *L. reuteri*: *Lactobacillus reuteri*; *L. & B. & Sac.*: *Lactobacillus* spp. & *Bifidobacterium* spp. & *Saccharomyces boulardii*; *L. & B. & Strp.*: *Lactobacillus* spp. & *Bifidobacterium* spp. & *S. salivarius* subsp. *thermophilus*; *L. rhamnosus*: *Lactobacillus rhamnosus*; *S. boulardii*: *Saccharomyces boulardii*

**e-Table 5: Results of direct pairwise comparisons with number trials and events for each trial arm and certainty of evidence (CoE) for time to reach full enteral feed (days)**

| Comparison                                     | MD (95% CI)                        | # trials | n comparison 1 | n comparison 2 | I <sup>2</sup> | P-bias* | GRADE CoE | Imprecision | Indirectness | Inconsistency | Overall RoB  |
|------------------------------------------------|------------------------------------|----------|----------------|----------------|----------------|---------|-----------|-------------|--------------|---------------|--------------|
| <i>S. boulardii</i> vs PLC                     | -0.94 (-2.03, 0.15)                | 3        | 290            | 276            | 0.0            | -       | Moderate  | Serious     | Not serious  | Not serious   | Not serious  |
| <i>Bacillus coagulans</i> vs PLC               | -1.00 (-3.44, 1.44)                | 1        | 110            | 111            | -              | -       | Low       | Serious     | Not serious  | Not serious   | Serious      |
| <i>L. rhamnosus</i> vs PLC                     | -0.54 (-2.48, 1.40)                | 2        | 122            | 131            | 0.0            | -       | Low       | Serious     | Not serious  | Not serious   | Serious      |
| <i>L. reuteri</i> vs PLC                       | -2.37 (-3.92, -0.83)               | 6        | 430            | 425            | 84.4           | -       | Low       | Not serious | Not serious  | Serious       | Serious      |
| <i>L. &amp; B. &amp; Strp.</i> vs PLC          | <b><u>5.75 (1.26, 10.24)</u></b>   | 1        | 75             | 75             | -              | -       | Moderate  | Serious     | Not serious  | Not serious   | Not serious  |
| <i>L. &amp; B. &amp; Sac</i> vs PLC            | -3.31 (-5.93, -0.68)               | 4        | 285            | 293            | 66.6           | -       | Low       | Not serious | Not serious  | Serious       | Serious      |
| <i>L. &amp; B. &amp; En.</i> vs PLC            | -2.47 (-4.63, -0.32)               | 2        | 71             | 71             | 0.0            | -       | Very low  | Serious     | Not serious  | Not serious   | Very serious |
| <i>L. &amp; B.</i> vs PLC                      | -2.08 (-4.03, -0.13)               | 8        | 657            | 644            | 92.0           | -       | Low       | Not serious | Not serious  | Serious       | Serious      |
| <i>B. animalis</i> subsp. <i>lactis</i> vs PLC | -2.37 (-7.02, 2.27)                | 3        | 232            | 223            | 83.1           | -       | Low       | Serious     | Not serious  | Serious       | Serious      |
| <i>B. breve</i> vs PLC                         | -1.57 (-4.55, 1.40)                | 3        | 835            | 834            | 78.5           | -       | Moderate  | Serious     | Not serious  | Serious       | Serious      |
| <i>B. bifidum</i> vs PLC                       | -1.10 (-2.05, -0.15)               | 1        | 119            | 114            | -              | -       | Moderate  | Not serious | Not serious  | Not serious   | Serious      |
| <i>B. &amp; Strp.</i> vs PLC                   | -0.96 (-2.80, 0.89)                | 2        | 620            | 624            | 37.5           | -       | Moderate  | Serious     | Not serious  | Not serious   | Serious      |
| <i>L. reuteri</i> vs <i>L. rhamnosus</i>       | <b><u>-4.50 (-6.21, -2.79)</u></b> | 1        | 83             | 83             | -              | -       | Low       | Not serious | Not serious  | Not serious   | Very serious |

\*P-value of Eggers's test for small-study effects. Footnote: Results are mean difference (95% CIs) from DerSimonian and Laird random-effects meta-analysis. Numbers underlined in bold represent statistically significant results. "n" is number of infants randomized to each arm. RoB = overall risk of bias; PLC = Placebo. *Bac. coagulans*: *Bacillus coagulans*; *B. & Strp.*: *Bifidobacterium* spp. & *Streptococcus salivarius* subsp. *thermophilus*; *B. bifidum*: *Bifidobacterium bifidum*; *B. breve*: *Bifidobacterium breve*; *L. & B.*: *Lactobacillus* spp. & *Bifidobacterium* spp.; *L. reuteri*: *Lactobacillus reuteri*; *L. & B. & Sac.*: *Lactobacillus* spp. & *Bifidobacterium* spp. & *Saccharomyces boulardii*; *L. & B. & Strp.*: *Lactobacillus* spp. & *Bifidobacterium* spp. & *S. salivarius* subsp. *thermophilus*; *L. rhamnosus*: *Lactobacillus rhamnosus*; *S. boulardii*: *Saccharomyces boulardii*

**e-Table 6: Results of direct pairwise comparisons with number trials and events for each trial arm and certainty of evidence (CoE) for duration of hospitalization**

| Comparison                                     | MD (95% CI)                          | # trials | n comparison 1 | n comparison 2 | I <sup>2</sup> | P-bias* | GRADE CoE | Imprecision | Indirectness | Inconsistency | Overall RoB |
|------------------------------------------------|--------------------------------------|----------|----------------|----------------|----------------|---------|-----------|-------------|--------------|---------------|-------------|
| <i>S. boulardii</i> vs PLC                     | -1.75 (-7.40, 3.89)                  | 3        | 290            | 289            | 83.5           | -       | Low       | Serious     | Not serious  | Serious       | Serious     |
| <i>Bacillus coagulans</i> vs PLC               | 4.50 (-0.69, 9.69)                   | 1        | 110            | 111            | -              | -       | Low       | Serious     | Not serious  | Not serious   | Serious     |
| <i>L. rhamnosus</i> vs PLC                     | -4.00 (-8.12, 0.11)                  | 4        | 173            | 174            | 0.0            | -       | Moderate  | Serious     | Not serious  | Not serious   | Not serious |
| <i>L. reuteri</i> vs PLC                       | -8.08 (-13.46, -2.71)                | 5        | 709            | 711            | 96.1           | -       | Low       | Not serious | Not serious  | Serious       | Serious     |
| <i>L. acidophilus</i> vs PLC                   | 20.70 (-11.77, 53.17)                | 1        | 15             | 15             | -              | -       | Low       | Serious     | Not serious  | Not serious   | Serious     |
| <i>L. &amp; B. &amp; Strp</i> vs PLC           | 7.25 (-3.71, 18.21)                  | 1        | 75             | 75             | -              | -       | Moderate  | Serious     | Not serious  | Not serious   | Not serious |
| <i>L. &amp; B. &amp; Sac</i> vs PLC            | -3.74 (-5.68, -1.81)                 | 3        | 192            | 190            | 0.0            | -       | Moderate  | Not serious | Not serious  | Not serious   | Serious     |
| <i>L. &amp; B. &amp; En</i> vs PLC             | -6.00 (-17.49, 5.49)                 | 1        | 40             | 40             | -              | -       | Low       | Serious     | Not serious  | Not serious   | Serious     |
| <i>L. &amp; B.</i> vs PLC                      | -3.03 (-5.86, -0.19)                 | 7        | 672            | 677            | 81.9           | -       | Low       | Not serious | Not serious  | Serious       | Serious     |
| <i>B. animalis</i> subsp. <i>lactis</i> vs PLC | <b><u>-13.00 (-19.57, -6.43)</u></b> | 1        | 100            | 100            | -              | -       | Moderate  | Serious     | Not serious  | Not serious   | Not serious |
| <i>B. breve</i> vs PLC                         | 1.67 (-2.12, 5.47)                   | 3        | 766            | 765            | 0.0            | -       | High      | Not serious | Not serious  | Not serious   | Not serious |
| <i>B. bifidum</i> vs PLC                       | -0.60 (-11.48, 10.28)                | 1        | 119            | 114            | -              | -       | Low       | Serious     | Not serious  | Not serious   | Serious     |
| <i>B. &amp; Strp.</i> vs PLC                   | -2.75 (-4.00, -1.50)                 | 1        | 548            | 551            | -              | -       | High      | Not serious | Not serious  | Not serious   | Not serious |
| <i>L. reuteri</i> vs <i>L. rhamnosus</i>       | -9.10 (-12.88, -5.32)                | 1        | 83             | 83             | -              | -       | Moderate  | Not serious | Not serious  | Not serious   | Serious     |

\*P-value of Eggers's test for small-study effects. Footnote: Results are Odds Ratio (95% CIs) from DerSimonian and Laird random-effects meta-analysis. Numbers underlined in bold represent statistically significant results. "n" is number of infants randomized to each arm. RoB = overall risk of bias; PLC = Placebo. *Bac. coagulans*: *Bacillus coagulans*; *B. & Strp.*: *Bifidobacterium* spp. & *Streptococcus salivarius* subsp. *thermophilus*; *B. bifidum*: *Bifidobacterium bifidum*; *B. animalis* subsp. *lactis*: *Bifidobacterium animalis* subsp. *lactis*; *B. breve*: *Bifidobacterium breve*; *L. & B.*: *Lactobacillus* spp. & *Bifidobacterium* spp.; *L. & B. & En.*: *Lactobacillus* spp. & *Bifidobacterium* spp. & *Enterococcus* spp.; *L. acidophilus*: *Lactobacillus acidophilus*; *L. reuteri*: *Lactobacillus reuteri*; *L. & B. & Sac.*: *Lactobacillus* spp. & *Bifidobacterium* spp. & *Saccharomyces boulardii*; *L. & B. & Strp.*: *Lactobacillus* spp. & *Bifidobacterium* spp. & *S. salivarius* subsp. *thermophilus*; *L. rhamnosus*: *Lactobacillus rhamnosus*; *S. boulardii*: *Saccharomyces boulardii*







**e-Table 10: Network meta-analysis results for reduction in number of days to reach full enteral feeding**

|                        |                       |                       |                       |                       |                                                                 |                                                              |                                                            |                                           |                      |                      |                       |                                         |  |  |  |  |  |  |  |  |  |
|------------------------|-----------------------|-----------------------|-----------------------|-----------------------|-----------------------------------------------------------------|--------------------------------------------------------------|------------------------------------------------------------|-------------------------------------------|----------------------|----------------------|-----------------------|-----------------------------------------|--|--|--|--|--|--|--|--|--|
| <b>Placebo</b>         |                       |                       |                       |                       |                                                                 |                                                              |                                                            |                                           |                      |                      |                       |                                         |  |  |  |  |  |  |  |  |  |
| -1.02<br>(-3.64,1.61)  | <b>S. boulardii</b>   |                       |                       |                       |                                                                 |                                                              |                                                            |                                           |                      |                      |                       |                                         |  |  |  |  |  |  |  |  |  |
| -1.00<br>(-5.78,3.78)  | 0.02<br>(-5.43,5.47)  | <b>Bac. Coagulans</b> |                       |                       |                                                                 |                                                              |                                                            |                                           |                      |                      |                       |                                         |  |  |  |  |  |  |  |  |  |
| 0.02<br>(-3.29,3.32)   | 1.03<br>(-3.19,5.25)  | 1.02<br>(-4.79,6.83)  | <b>L. rhamnosus</b>   |                       |                                                                 |                                                              |                                                            |                                           |                      |                      |                       |                                         |  |  |  |  |  |  |  |  |  |
| -2.62<br>(-4.53,-0.71) | -1.60<br>(-4.85,1.64) | -1.62<br>(-6.77,3.53) | -2.64<br>(-6.08,0.81) | <b>L. reuteri</b>     |                                                                 |                                                              |                                                            |                                           |                      |                      |                       |                                         |  |  |  |  |  |  |  |  |  |
| 5.75<br>(-0.33,11.83)  | 6.77<br>(0.14,13.39)  | 6.75<br>(-0.98,14.48) | 5.73<br>(-1.19,12.66) | 8.37<br>(1.99,14.75)  | <b>Lactobacillus sp. &amp; Bifido sp. &amp; S. thermophilus</b> |                                                              |                                                            |                                           |                      |                      |                       |                                         |  |  |  |  |  |  |  |  |  |
| -3.30<br>(-5.91,-0.69) | -2.29<br>(-5.99,1.42) | -2.30<br>(-7.75,3.14) | -3.32<br>(-7.52,0.89) | -0.68<br>(-3.91,2.55) | -9.05<br>(-15.67,-2.43)                                         | <b>Lactobacillus sp. &amp; Bifido sp. &amp; S. boulardii</b> |                                                            |                                           |                      |                      |                       |                                         |  |  |  |  |  |  |  |  |  |
| -2.57<br>(-6.55,1.41)  | -1.56<br>(-6.32,3.21) | -1.57<br>(-7.79,4.65) | -2.59<br>(-7.76,2.58) | 0.05<br>(-4.36,4.46)  | -8.32<br>(-15.59,-1.05)                                         | 0.73<br>(-4.03,5.49)                                         | <b>Lactobacillus sp. &amp; Bifido sp. &amp; Entero sp.</b> |                                           |                      |                      |                       |                                         |  |  |  |  |  |  |  |  |  |
| -2.15<br>(-3.78,-0.51) | -1.13<br>(-4.22,1.96) | -1.15<br>(-6.20,3.90) | -2.16<br>(-5.86,1.53) | 0.47<br>(-2.05,3.00)  | -7.90<br>(-14.20,-1.60)                                         | 1.15<br>(-1.94,4.24)                                         | 0.42<br>(-3.88,4.73)                                       | <b>Lactobacillus sp. &amp; Bifido sp.</b> |                      |                      |                       |                                         |  |  |  |  |  |  |  |  |  |
| -2.30<br>(-5.35,0.74)  | -1.29<br>(-5.31,2.73) | -1.30<br>(-6.97,4.36) | -2.32<br>(-6.81,2.17) | 0.31<br>(-3.28,3.91)  | -8.05<br>(-14.86,-1.25)                                         | 1.00<br>(-3.02,5.01)                                         | 0.27<br>(-4.75,5.28)                                       | -0.16<br>(-3.62,3.31)                     | <b>B. lactis</b>     |                      |                       |                                         |  |  |  |  |  |  |  |  |  |
| -1.53<br>(-4.30,1.24)  | -0.51<br>(-4.33,3.30) | -0.53<br>(-6.05,4.99) | -1.54<br>(-5.85,2.76) | 1.09<br>(-2.27,4.45)  | -7.28<br>(-13.96,-0.59)                                         | 1.77<br>(-2.03,5.57)                                         | 1.04<br>(-3.81,5.89)                                       | 0.62<br>(-2.61,3.84)                      | 0.78<br>(-3.34,4.89) | <b>B. breve</b>      |                       |                                         |  |  |  |  |  |  |  |  |  |
| -1.10<br>(-5.31,3.11)  | -0.08<br>(-5.05,4.88) | -0.10<br>(-6.47,6.27) | -1.12<br>(-6.47,4.24) | 1.52<br>(-3.11,6.15)  | -6.85<br>(-14.25,0.55)                                          | 2.20<br>(-2.76,7.16)                                         | 1.47<br>(-4.32,7.27)                                       | 1.05<br>(-3.47,5.57)                      | 1.20<br>(-4.00,6.41) | 0.43<br>(-4.61,5.47) | <b>B. bifidum</b>     |                                         |  |  |  |  |  |  |  |  |  |
| -1.35<br>(-4.66,1.95)  | -0.34<br>(-4.56,3.88) | -0.35<br>(-6.16,5.46) | -1.37<br>(-6.04,3.30) | 1.27<br>(-2.55,5.08)  | -7.10<br>(-14.03,-0.18)                                         | 1.95<br>(-2.26,6.15)                                         | 1.22<br>(-3.95,6.39)                                       | 0.79<br>(-2.90,4.49)                      | 0.95<br>(-3.54,5.45) | 0.18<br>(-4.13,4.48) | -0.25<br>(-5.61,5.10) | <b>Bifido sp. &amp; S. thermophilus</b> |  |  |  |  |  |  |  |  |  |

Footnote: Results are mean change (95% CI) from the network meta-analysis. Mean difference values less than 0 indicates the treatment in bottom right is better. Numbers in bold represent statistically significant results. Colors represent the certainty in evidence (CoE) for each pairwise comparison; Dark green = High CoE, light green = Moderate CoE, light yellow = Low CoE, and light red = Very Low CoE. *Bac. coagulans*: *Bacillus coagulans*; *B. & Strp.*: *Bifidobacterium* spp. & *Streptococcus salivarius* subsp. *thermophilus*; *B. bifidum*: *Bifidobacterium bifidum*; *B. breve*: *Bifidobacterium breve*; *L. & B.*: *Lactobacillus* spp. & *Bifidobacterium* spp.; *L. reuteri*: *Lactobacillus reuteri*; *L. & B. & Sac.*: *Lactobacillus* spp. & *Bifidobacterium* spp. & *Saccharomyces boulardii*; *L. & B. & Strp.*: *Lactobacillus* spp. & *Bifidobacterium* spp. & *S. salivarius* subsp. *thermophilus*; *L. rhamnosus*: *Lactobacillus rhamnosus*; *S. boulardii*: *Saccharomyces boulardii*

**e-Table 11: Network meta-analysis results for duration of hospitalization (days)**

|                          |                          |                          |                         |                        |                          |                                                                 |                                                              |                                                            |                                           |                        |                         |                         |                                         |  |  |  |  |  |
|--------------------------|--------------------------|--------------------------|-------------------------|------------------------|--------------------------|-----------------------------------------------------------------|--------------------------------------------------------------|------------------------------------------------------------|-------------------------------------------|------------------------|-------------------------|-------------------------|-----------------------------------------|--|--|--|--|--|
| Placebo                  |                          |                          |                         |                        |                          |                                                                 |                                                              |                                                            |                                           |                        |                         |                         |                                         |  |  |  |  |  |
| -1.86<br>(-6.65,2.92)    | <b>S. boulardii</b>      |                          |                         |                        |                          |                                                                 |                                                              |                                                            |                                           |                        |                         |                         |                                         |  |  |  |  |  |
| 4.50<br>(-4.33,13.33)    | 6.36<br>(-3.68,16.40)    | <b>Bac. Coagulans</b>    |                         |                        |                          |                                                                 |                                                              |                                                            |                                           |                        |                         |                         |                                         |  |  |  |  |  |
| -1.85<br>(-7.62,3.91)    | 0.01<br>(-7.50,7.52)     | -6.35<br>(-16.90,4.19)   | <b>L. rhamnosus</b>     |                        |                          |                                                                 |                                                              |                                                            |                                           |                        |                         |                         |                                         |  |  |  |  |  |
| -7.89<br>(-11.60,-4.17)  | -6.03<br>(-12.10,0.05)   | -12.39<br>(-21.97,-2.81) | -6.03<br>(-12.16,0.09)  | <b>L. reuteri</b>      |                          |                                                                 |                                                              |                                                            |                                           |                        |                         |                         |                                         |  |  |  |  |  |
| 20.70<br>(-12.55,53.95)  | 22.56<br>(-11.03,56.15)  | 16.20<br>(-18.20,50.60)  | 22.55<br>(-11.19,56.30) | 28.59<br>(-4.87,62.04) | <b>L. acidophilus</b>    |                                                                 |                                                              |                                                            |                                           |                        |                         |                         |                                         |  |  |  |  |  |
| 7.25<br>(-5.83,20.33)    | 9.11<br>(-4.81,23.04)    | 2.75<br>(-13.03,18.53)   | 9.10<br>(-5.19,23.39)   | 15.14<br>(1.54,28.73)  | -13.45<br>(-49.18,22.28) | <b>Lactobacillus sp. &amp; Bifido sp. &amp; S. thermophilus</b> |                                                              |                                                            |                                           |                        |                         |                         |                                         |  |  |  |  |  |
| -3.20<br>(-8.38,1.98)    | -1.34<br>(-8.39,5.71)    | -7.70<br>(-17.94,2.54)   | -1.35<br>(-9.11,6.41)   | 4.69<br>(-1.70,11.07)  | -23.90<br>(-57.55,9.75)  | -10.45<br>(-24.52,3.61)                                         | <b>Lactobacillus sp. &amp; Bifido sp. &amp; S. boulardii</b> |                                                            |                                           |                        |                         |                         |                                         |  |  |  |  |  |
| -6.00<br>(-19.53,7.53)   | -4.14<br>(-18.49,10.21)  | -10.50<br>(-26.66,5.66)  | -4.15<br>(-18.86,10.56) | 1.89<br>(-12.14,15.92) | -26.70<br>(-62.60,9.20)  | -13.25<br>(-32.07,5.57)                                         | -2.80<br>(-17.29,11.69)                                      | <b>Lactobacillus sp. &amp; Bifido sp. &amp; Entero sp.</b> |                                           |                        |                         |                         |                                         |  |  |  |  |  |
| -2.84<br>(-6.21,0.54)    | -0.97<br>(-6.82,4.87)    | -7.34<br>(-16.79,2.12)   | -0.98<br>(-7.69,5.72)   | 5.05<br>(0.00,10.10)   | -23.54<br>(-56.95,9.88)  | -10.09<br>(-23.59,3.42)                                         | 0.37<br>(-5.81,6.55)                                         | 3.16<br>(-10.78,17.11)                                     | <b>Lactobacillus sp. &amp; Bifido sp.</b> |                        |                         |                         |                                         |  |  |  |  |  |
| -13.00<br>(-22.71,-3.29) | -11.14<br>(-21.96,-0.32) | -17.50<br>(-30.62,-4.38) | -11.15<br>(-22.44,0.14) | -5.11<br>(-15.51,5.28) | -33.70<br>(-68.34,0.94)  | -20.25<br>(-36.54,-3.96)                                        | -9.80<br>(-20.80,1.20)                                       | -7.00<br>(-23.65,9.65)                                     | -10.16<br>(-20.44,0.11)                   | <b>B. lactis</b>       |                         |                         |                                         |  |  |  |  |  |
| 1.18<br>(-5.88,8.24)     | 3.04<br>(-5.50,11.58)    | -3.32<br>(-14.63,7.98)   | 3.03<br>(-6.08,12.14)   | 9.07<br>(1.10,17.03)   | -19.52<br>(-53.51,14.47) | -6.07<br>(-20.93,8.79)                                          | 4.38<br>(-4.38,13.14)                                        | 7.18<br>(-8.08,22.44)                                      | 4.01<br>(-3.82,11.85)                     | 14.18<br>(2.18,26.18)  | <b>B. breve</b>         |                         |                                         |  |  |  |  |  |
| -0.60<br>(-13.61,12.41)  | 1.26<br>(-12.61,15.13)   | -5.10<br>(-20.83,10.63)  | 1.25<br>(-12.98,15.49)  | 7.29<br>(-6.25,20.82)  | -21.30<br>(-57.00,14.40) | -7.85<br>(-26.30,10.60)                                         | 2.60<br>(-11.41,16.61)                                       | 5.40<br>(-13.37,24.17)                                     | 2.24<br>(-11.21,15.68)                    | 12.40<br>(-3.83,28.63) | -1.78<br>(-16.58,13.03) | <b>B. bifidum</b>       |                                         |  |  |  |  |  |
| -2.75<br>(-10.00,4.50)   | -0.89<br>(-9.57,7.80)    | -7.25<br>(-18.67,4.17)   | -0.90<br>(-10.16,8.37)  | 5.14<br>(-3.01,13.28)  | -23.45<br>(-57.48,10.58) | -10.00<br>(-24.95,4.95)                                         | 0.45<br>(-8.46,9.36)                                         | 3.25<br>(-12.10,18.60)                                     | 0.09<br>(-7.91,8.08)                      | 10.25<br>(-1.86,22.36) | -3.93<br>(-14.05,6.19)  | -2.15<br>(-17.05,12.75) | <b>Bifido sp. &amp; S. thermophilus</b> |  |  |  |  |  |

Footnote: Results are mean change (95% CI) from the network meta-analysis. Mean difference values less than 0 indicates the treatment in bottom right is better. Numbers in bold represent statistically significant results. Colors represent the certainty in evidence (CoE) for each pairwise comparison; Dark green = High CoE, light green = Moderate CoE, light yellow = Low CoE, and light red = Very Low CoE. *Bac. coagulans*: *Bacillus coagulans*; *B. & Strp.*: *Bifidobacterium* spp. & *Streptococcus salivarius* subsp. *thermophilus*; *B. bifidum*: *Bifidobacterium bifidum*; *B. animalis* subsp. *lactis*: *Bifidobacterium animalis* subsp. *lactis*; *B. breve*: *Bifidobacterium breve*; *L. & B.*: *Lactobacillus* spp. & *Bifidobacterium* spp.; *L. & B. & En.*: *Lactobacillus* spp. & *Bifidobacterium* spp. & *Enterococcus* spp.; *L. acidophilus*: *Lactobacillus acidophilus*; *L. reuteri*: *Lactobacillus reuteri*; *L. & B. & Sac.*: *Lactobacillus* spp. & *Bifidobacterium* spp. & *Saccharomyces boulardii*; *L. & B. & Strp.*: *Lactobacillus* spp. & *Bifidobacterium* spp. & *S. salivarius* subsp. *thermophilus*; *L. rhamnosus*: *Lactobacillus rhamnosus*; *S. boulardii*: *Saccharomyces boulardii*



## Appendix 9: Results from evaluating incoherence in loops of evidence

e-figure 6: Incoherence plot for all-cause mortality

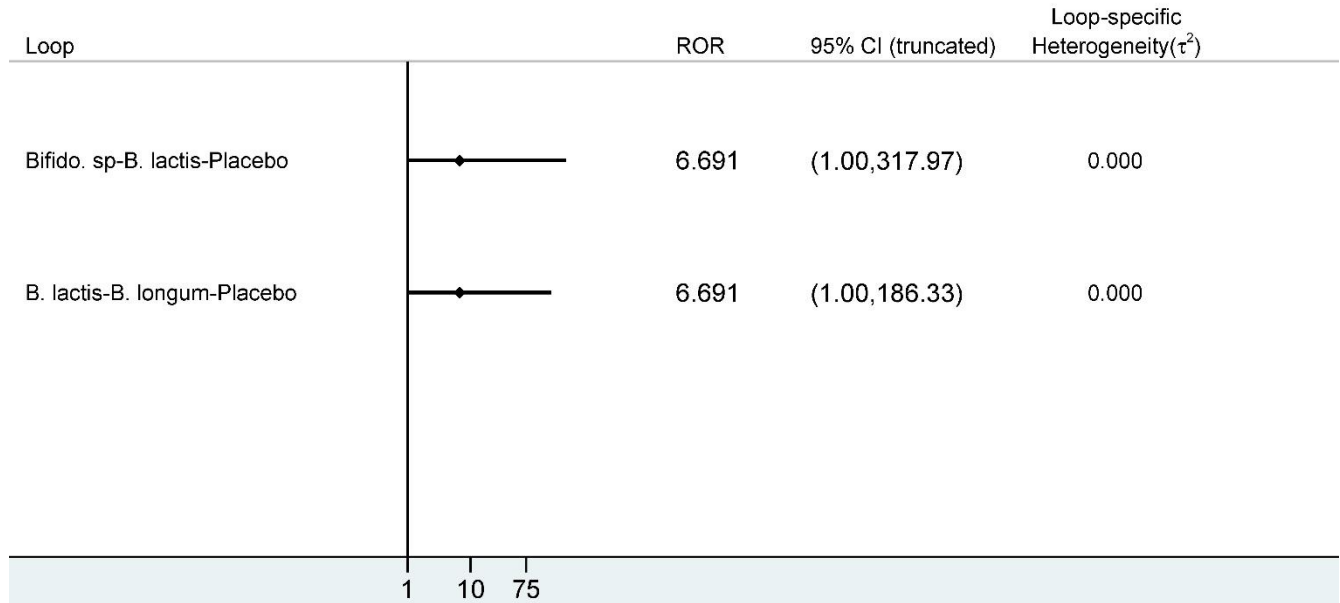

\* Loops of [Bifido sp,-B. lactis-B. longum] & [Bifido sp,-B. lactis-Placebo] are formed only by multi-arm trials - consistent by definition

Incoherence factors (IF) along with 95% confidence intervals (CI) are displayed. IFs are calculated as the ratio of the ORs (ROR) from direct and indirect evidence in the loop. Comparisons that their lower CI limit does not reach the line of 1 are considered to present statistically significant incoherence. P value for the 'design-by-treatment' model (global test of incoherence) = 0.161. *Bifido* sp. = *Bifidobacterium* sp.

**e-figure 7: Incoherence plot for severe NEC (Bell’s stage II or more)**

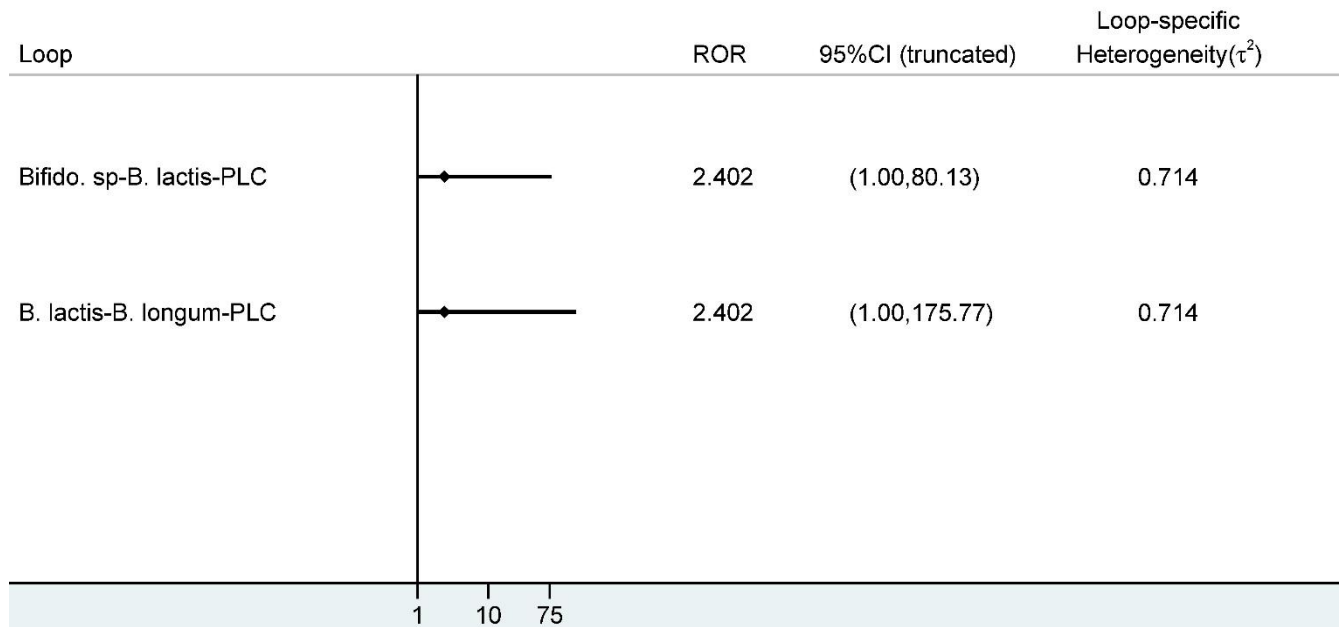

\* Loops [Bifido. sp-B. lactis-B. longum] [Bifido. sp-B. longum-PLC] are formed only by multi-arm trials - Consistent by definition

Incoherence factors (IF) along with 95% confidence intervals (CI) are displayed. IFs are calculated as the ratio of the ORs from direct and indirect evidence in the loop. Comparisons that their lower CI limit does not reach the line of 1 are considered to present statistically significant incoherence. P value for the ‘design-by-treatment’ model (global test of incoherence) = 0.349. PLC = placebo; *Bifido* sp. = *Bifidobacterium* sp.

**e-figure 8: Incoherence plot for culture proven sepsis**

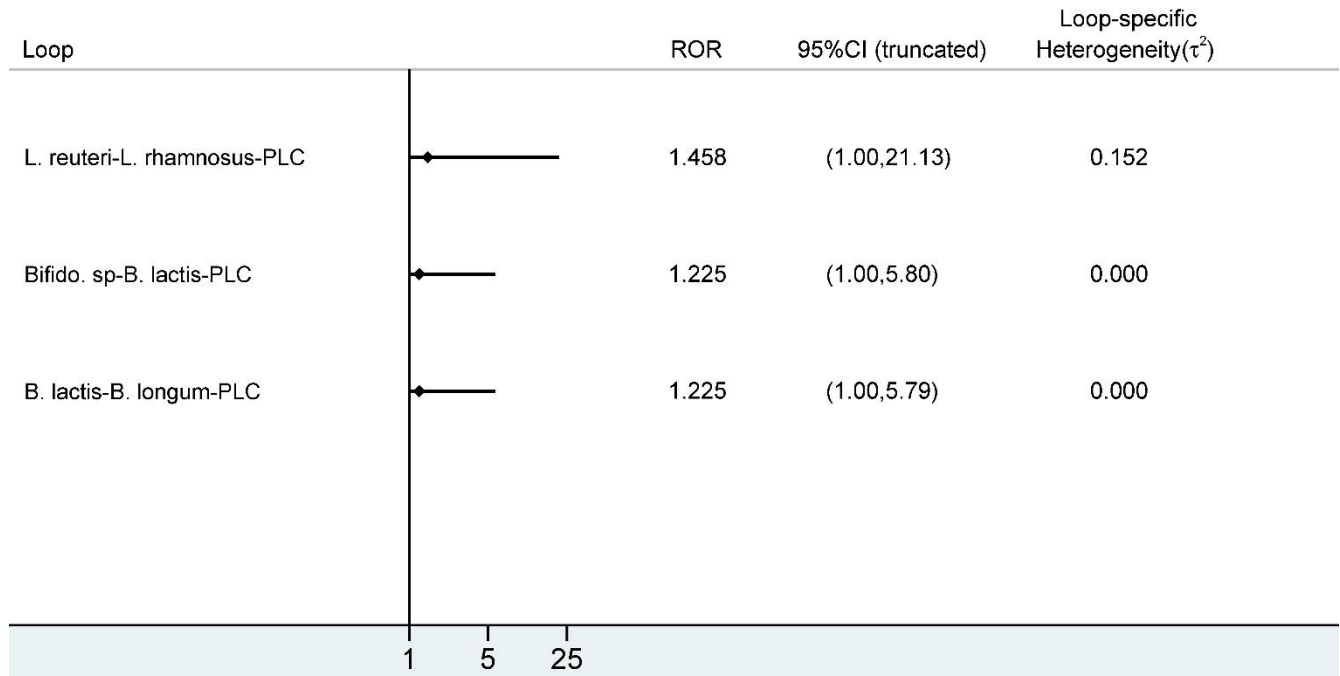

\* Loops [Bifido. sp-B. lactis-B. longum] [Bifido. sp-B. longum-PLC] are formed only by multi-arm trials - Consistent by definition

Incoherence factors (IF) along with 95% confidence intervals (CI) are displayed. IFs are calculated as the ratio of the ORs from direct and indirect evidence in the loop. Comparisons that their lower CI limit does not reach the line of 1 are considered to present statistically significant incoherence. P value for the 'design-by-treatment' model (global test of incoherence) = 0.166. PLC = placebo; Bifido sp. = Bifidobacterium sp.

**e-figure 9: Incoherence plot for time to reach full enteral feed (days)**

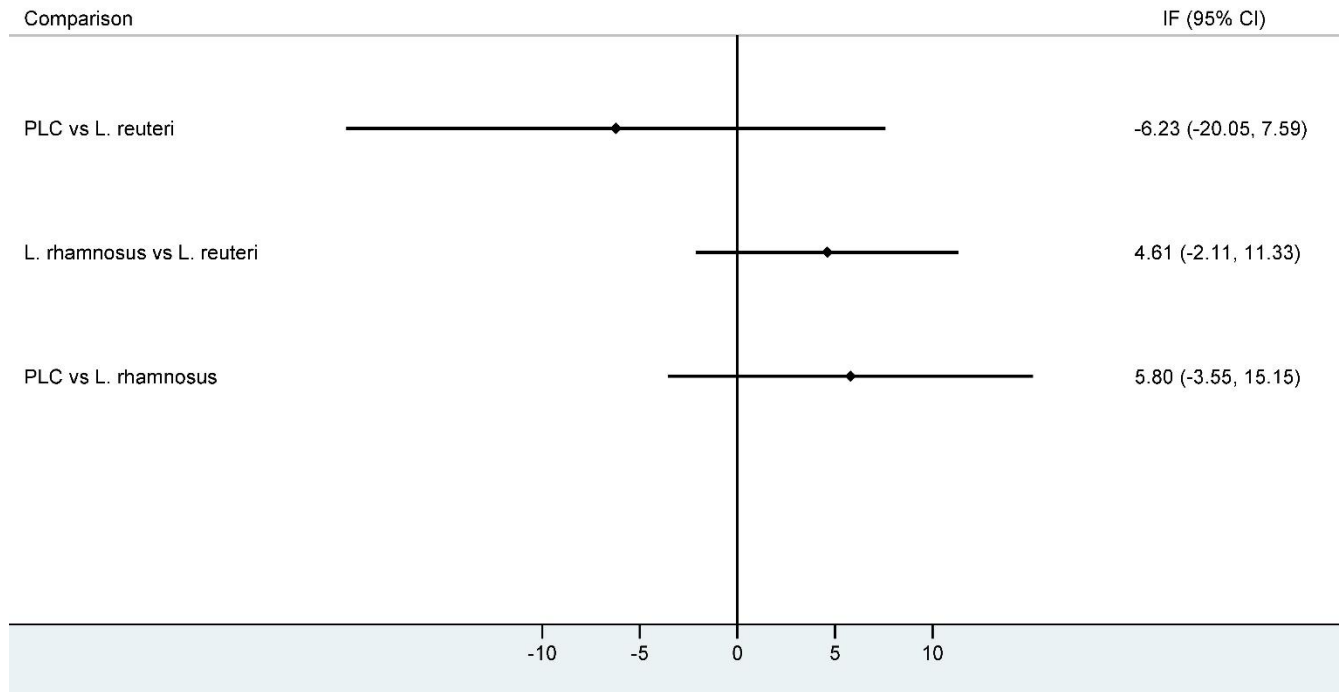

Incoherence factors (IF) along with 95% confidence intervals (CI) are displayed. IFs are calculated as the absolute difference between direct and indirect estimates. Comparisons that their lower CI limit does not reach the zero line are considered to present statistically significant inconsistency. P value for the 'design-by-treatment' model (global test of incoherence) = 0.179. PLC = placebo.

**e-figure 10: Incoherence plot for duration of hospitalization (days)**

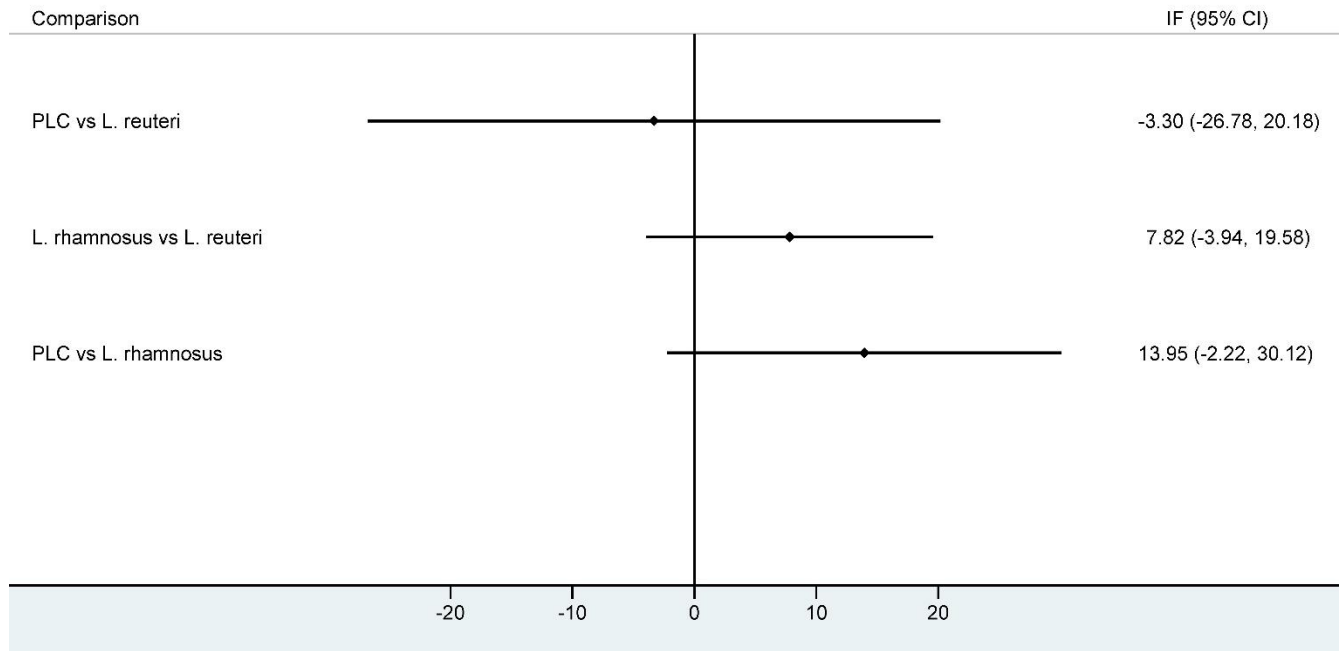

Incoherence factors (IF) along with 95% confidence intervals (CI) are displayed. IFs are calculated as the absolute difference between direct and indirect estimates. Comparisons that their lower CI limit does not reach the zero line are considered to present statistically significant inconsistency. P value for the 'design-by-treatment' model (global test of incoherence) = 0.349. PLC = placebo.

## Appendix 10: SUCRA and cumulative probability plots

e-Table 12: The surface under the cumulative ranking (SUCRA) values and mean ranks for primary outcomes

| Interventions                           | All-cause mortality |           | NEC (Bell's stage $\geq$ II) |           | Culture proven sepsis |           | Hospitalization |           | Time to reach full feed |           |
|-----------------------------------------|---------------------|-----------|------------------------------|-----------|-----------------------|-----------|-----------------|-----------|-------------------------|-----------|
|                                         | SUCRA value         | Mean rank | SUCRA value                  | Mean rank | SUCRA value           | Mean rank | SUCRA value     | Mean rank | SUCRA value             | Mean rank |
| <i>L. acidophilus</i>                   | 76.6                | 5.2       | 81.3                         | 4.4       | -                     | -         | 16.8            | 11.8      | -                       | -         |
| <i>B. longum</i> subsp. <i>longum</i>   | 75.8                | 5.4       | 70.9                         | 6.2       | 53                    | 8         | -               | -         | -                       | -         |
| <i>L. reuteri</i>                       | 75.7                | 5.4       | 37.4                         | 12.3      | 59.1                  | 7.1       | 10.8            | 12.6      | 2.2                     | 12.7      |
| <i>L. &amp; B. &amp; En.</i>            | 71.1                | 6.2       | 68.5                         | 6.7       | 39.3                  | 10.1      | 59.9            | 6.2       | 64.5                    | 5.3       |
| <i>B. &amp; Strp.</i>                   | 69.1                | 6.6       | 15.7                         | 16.2      | 48.9                  | 8.7       | 36.5            | 9.2       | 23.9                    | 10.1      |
| <i>L. rhamnosus</i>                     | 51.8                | 9.7       | 46.7                         | 10.6      | 55.7                  | 7.6       | 86.8            | 2.7       | 73.2                    | 4.2       |
| <i>L. &amp; B. &amp; Sac.</i>           | 49.9                | 10        | 76.8                         | 5.2       | 81.9                  | 3.7       | 69.5            | 5         | 68.1                    | 4.8       |
| <i>L. &amp; B.</i>                      | 49.5                | 10.1      | 69.7                         | 6.5       | 50.4                  | 8.4       | 95              | 1.7       | 65.6                    | 5.1       |
| <i>B. bifidum</i>                       | 46.6                | 10.6      | 79.2                         | 4.8       | 27.7                  | 11.8      | 57.7            | 6.5       | 50.3                    | 7         |
| <i>Bacillus coagulans</i>               | 46.6                | 10.6      | 30.7                         | 13.5      | 43                    | 9.5       | 51.7            | 7.3       | 29.7                    | 9.4       |
| <i>B. adolescentis</i>                  | 46.2                | 10.7      | 58.1                         | 8.5       | -                     | -         | -               | -         | -                       | -         |
| <i>Bacillus &amp; En.</i>               | 45.7                | 10.8      | 64.3                         | 7.4       | -                     | -         | -               | -         | -                       | -         |
| <i>S. boulardii</i>                     | 45.6                | 10.8      | 57.9                         | 8.6       | 25.8                  | 12.1      | 21              | 11.3      | 46.4                    | 7.4       |
| <i>B. animalis</i> subsp. <i>lactis</i> | 41.9                | 11.5      | 45                           | 10.9      | 54                    | 7.9       | 34.2            | 9.6       | 53.2                    | 6.6       |
| <i>Bacillus clausii</i>                 | 40                  | 11.8      | 23.6                         | 14.7      | 40.3                  | 10        |                 |           |                         |           |
| <i>L. &amp; B. &amp; Strp.</i>          | 33.7                | 12.9      | 35.2                         | 12.7      | 74.1                  | 4.9       | 61.5            | 6         | 81.4                    | 3.2       |
| <i>B. spp.</i>                          | 32.5                | 13.1      | 19.1                         | 15.6      | 25.3                  | 12.2      |                 |           |                         |           |
| <i>B. breve</i>                         | 15.9                | 16.1      | 39.8                         | 11.8      | 71.2                  | 5.3       | 46.3            | 8         | 47.1                    | 7.4       |

*B. adolescentis*: *Bifidobacterium adolescentis*; *B. & B.*: *Bifidobacterium animalis* subsp. *lactis* & *Bifidobacterium longum* subsp. *longum*; *Bac. coagulans*: *Bacillus coagulans*; *Bac & En.*: *Bacillus* spp. & *Enterococcus* spp.; *B. & Strp.*: *Bifidobacterium* spp. & *Streptococcus salivarius* subsp. *thermophilus*; *B. bifidum*: *Bifidobacterium bifidum*; *B. animalis* subsp. *lactis*: *Bifidobacterium animalis* subsp. *lactis*; *B. longum* subsp. *longum*: *Bifidobacterium longum* subsp. *longum*; *B. breve*: *Bifidobacterium breve*; *B. clausii*: *Bacillus clausii*; *L. acidophilus*: *Lactobacillus acidophilus*; *L. & B.*: *Lactobacillus* spp. & *Bifidobacterium* spp.; *L. & B. & En.*: *Lactobacillus* spp. & *Bifidobacterium* spp. & *Enterococcus* spp.; *L. reuteri*: *Lactobacillus reuteri*; *L. & B. & Sac.*: *Lactobacillus* spp. & *Bifidobacterium* spp. & *Saccharomyces boulardii*; *L. & B. & Strp.*: *Lactobacillus* spp. & *Bifidobacterium* spp. & *S. salivarius* subsp. *thermophilus*; *L. rhamnosus*: *Lactobacillus rhamnosus*; *S. boulardii*: *Saccharomyces boulardii*

**e-Figure 11: Plots of the surface under the cumulative ranking curves for all treatments for the ‘all-cause mortality’ outcome**

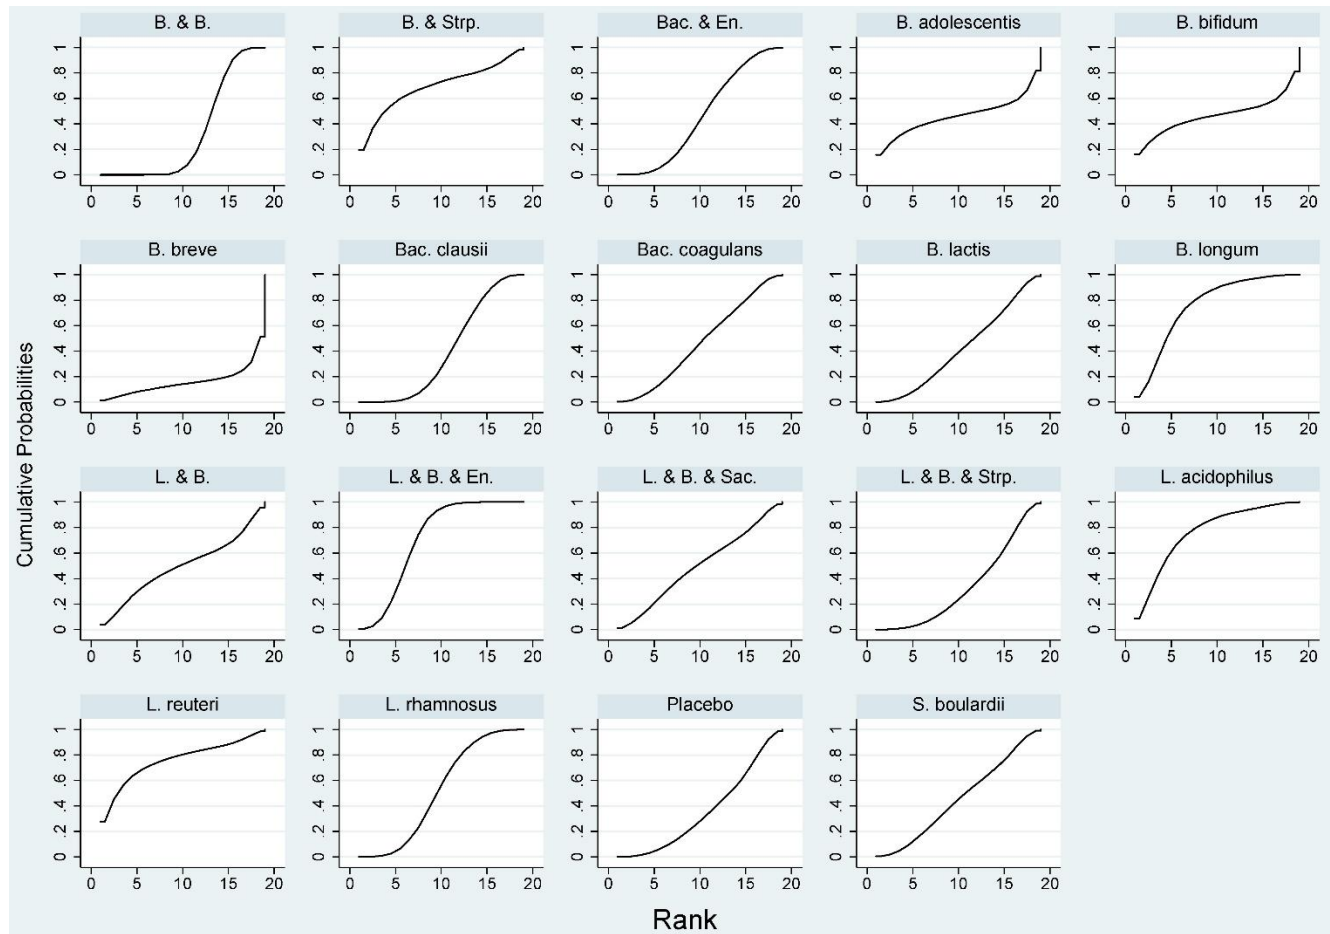

*B. adolescentis*: *Bifidobacterium adolescentis*; *B. & B.*: *Bifidobacterium animalis* subsp. *lactis* & *Bifidobacterium longum* subsp. *longum*; *Bac. coagulans*: *Bacillus coagulans*; *Bac & En.*: *Bacillus* spp. & *Enterococcus* spp.; *B. & Strp.*: *Bifidobacterium* spp. & *Streptococcus salivarius* subsp. *thermophilus*; *B. bifidum*: *Bifidobacterium bifidum*; *B. lactis*: *Bifidobacterium animalis* subsp. *lactis*; *B. longum*: *Bifidobacterium longum* subsp. *longum*; *B. breve*: *Bifidobacterium breve*; *Bac. clausii*: *Bacillus clausii*; *L. acidophilus*: *Lactobacillus acidophilus*; *L. & B.*: *Lactobacillus* spp. & *Bifidobacterium* spp.; *L. & B. & En.*: *Lactobacillus* spp. & *Bifidobacterium* spp. & *Enterococcus* spp.; *L. reuteri*: *Lactobacillus reuteri*; *L. & B. & Sac.*: *Lactobacillus* spp. & *Bifidobacterium* spp. & *Saccharomyces boulardii*; *L. & B. & Strp.*: *Lactobacillus* spp. & *Bifidobacterium* spp. & *S. salivarius* subsp. *thermophilus*; *L. rhamnosus*: *Lactobacillus rhamnosus*; *S. boulardii*: *Saccharomyces boulardii*

**e-Figure 12: Plots of the surface under the cumulative ranking curves for all treatments for the ‘NEC stage II or more’ outcome**

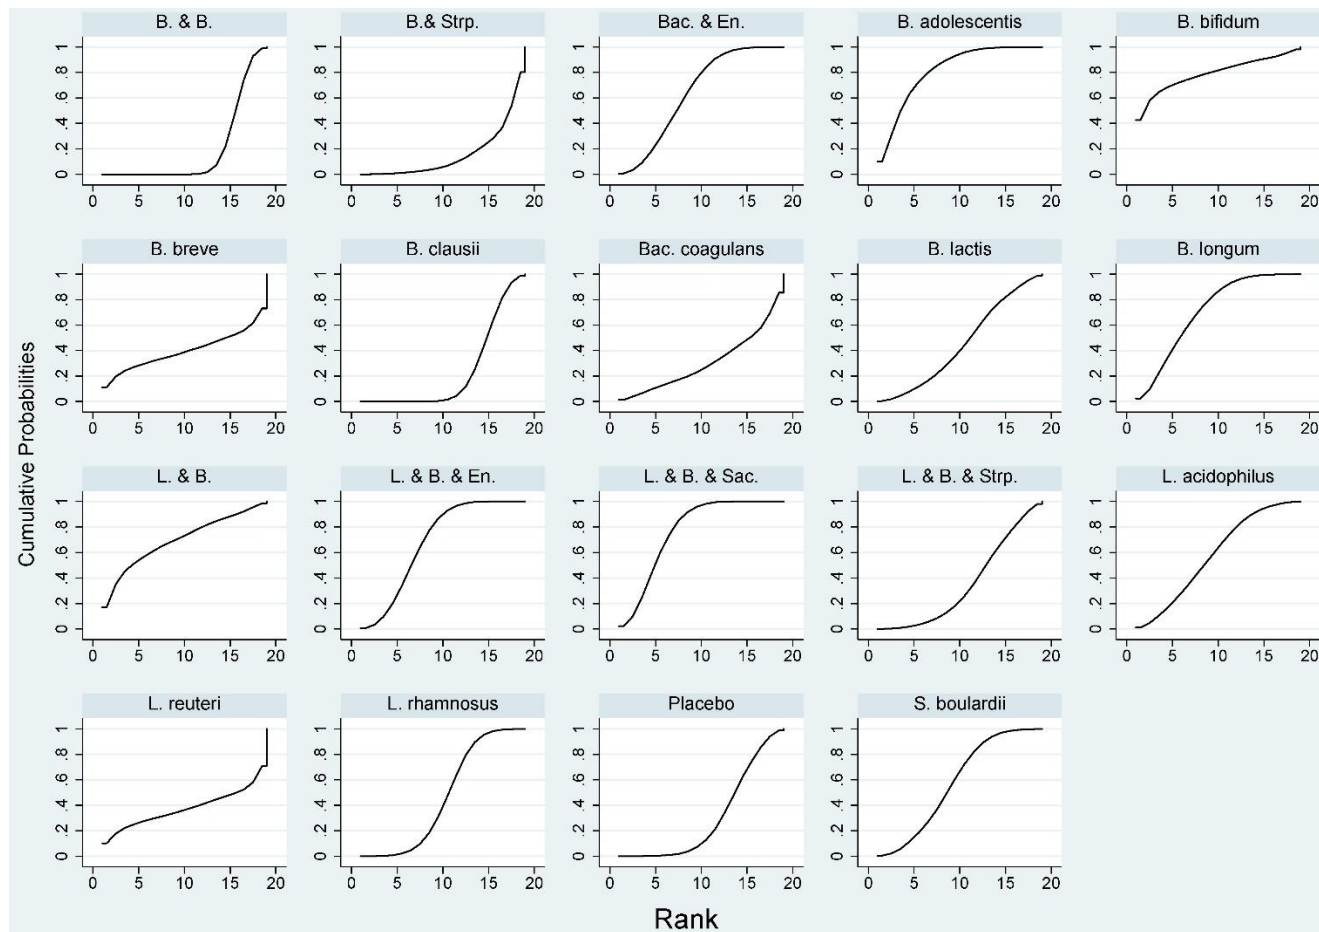

*B. adolescentis*: *Bifidobacterium adolescentis*; *B. & B.*: *Bifidobacterium animalis* subsp. *lactis* & *Bifidobacterium longum* subsp. *longum*; *Bac. coagulans*: *Bacillus coagulans*; *Bac & En.*: *Bacillus* spp. & *Enterococcus* spp.; *B. & Strp.*: *Bifidobacterium* spp. & *Streptococcus salivarius* subsp. *thermophilus*; *B. bifidum*: *Bifidobacterium bifidum*; *B. lactis*: *Bifidobacterium animalis* subsp. *lactis*; *B. longum*: *Bifidobacterium longum* subsp. *longum*; *B. breve*: *Bifidobacterium breve*; *B. clausii*: *Bacillus clausii*; *L. acidophilus*: *Lactobacillus acidophilus*; *L. & B.*: *Lactobacillus* spp. & *Bifidobacterium* spp.; *L. & B. & En.*: *Lactobacillus* spp. & *Bifidobacterium* spp. & *Enterococcus* spp.; *L. reuteri*: *Lactobacillus reuteri*; *L. & B. & Sac.*: *Lactobacillus* spp. & *Bifidobacterium* spp. & *Saccharomyces boulardii*; *L. & B. & Strp.*: *Lactobacillus* spp. & *Bifidobacterium* spp. & *S. salivarius* subsp. *thermophilus*; *L. rhamnosus*: *Lactobacillus rhamnosus*; *S. boulardii*: *Saccharomyces boulardii*



**e-Figure 13: Plots of the surface under the cumulative ranking curves for all treatments for the ‘culture proven sepsis’ outcome**

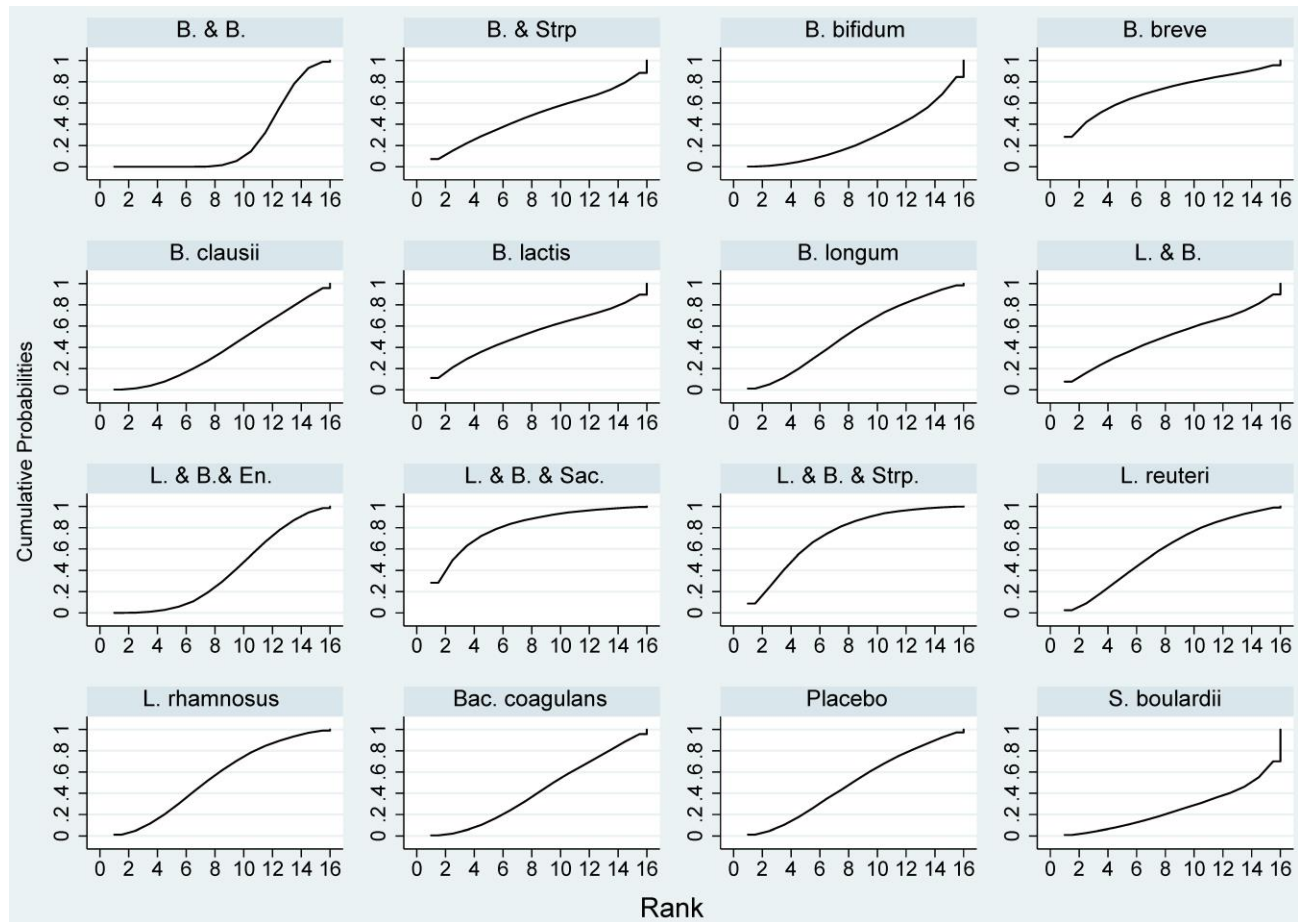

*B. & B.*: *Bifidobacterium animalis* subsp. *lactis* & *Bifidobacterium longum* subsp. *longum*; *Bac. coagulans*: *Bacillus coagulans*; *B. & Strp.*: *Bifidobacterium* spp. & *Streptococcus salivarius* subsp. *thermophilus*; *B. bifidum*: *Bifidobacterium bifidum*; *B. lactis*: *Bifidobacterium animalis* subsp. *lactis*; *B. longum*: *Bifidobacterium longum* subsp. *longum*; *B. breve*: *Bifidobacterium breve*; *B. clausii*: *Bacillus clausii*; *L. & B.*: *Lactobacillus* spp. & *Bifidobacterium* spp.; *L. & B. & En.*: *Lactobacillus* spp. & *Bifidobacterium* spp. & *Enterococcus* spp.; *L. reuteri*: *Lactobacillus reuteri*; *L. & B. & Sac.*: *Lactobacillus* spp. & *Bifidobacterium* spp. & *Saccharomyces boulardii*; *L. & B. & Strp.*: *Lactobacillus* spp. & *Bifidobacterium* spp. & *S. salivarius* subsp. *thermophilus*; *L. rhamnosus*: *Lactobacillus rhamnosus*; *S. boulardii*: *Saccharomyces boulardii*

**e-Figure 14: Plots of the surface under the cumulative ranking curves for all treatments for the 'time to reach full enteral feed' outcome**

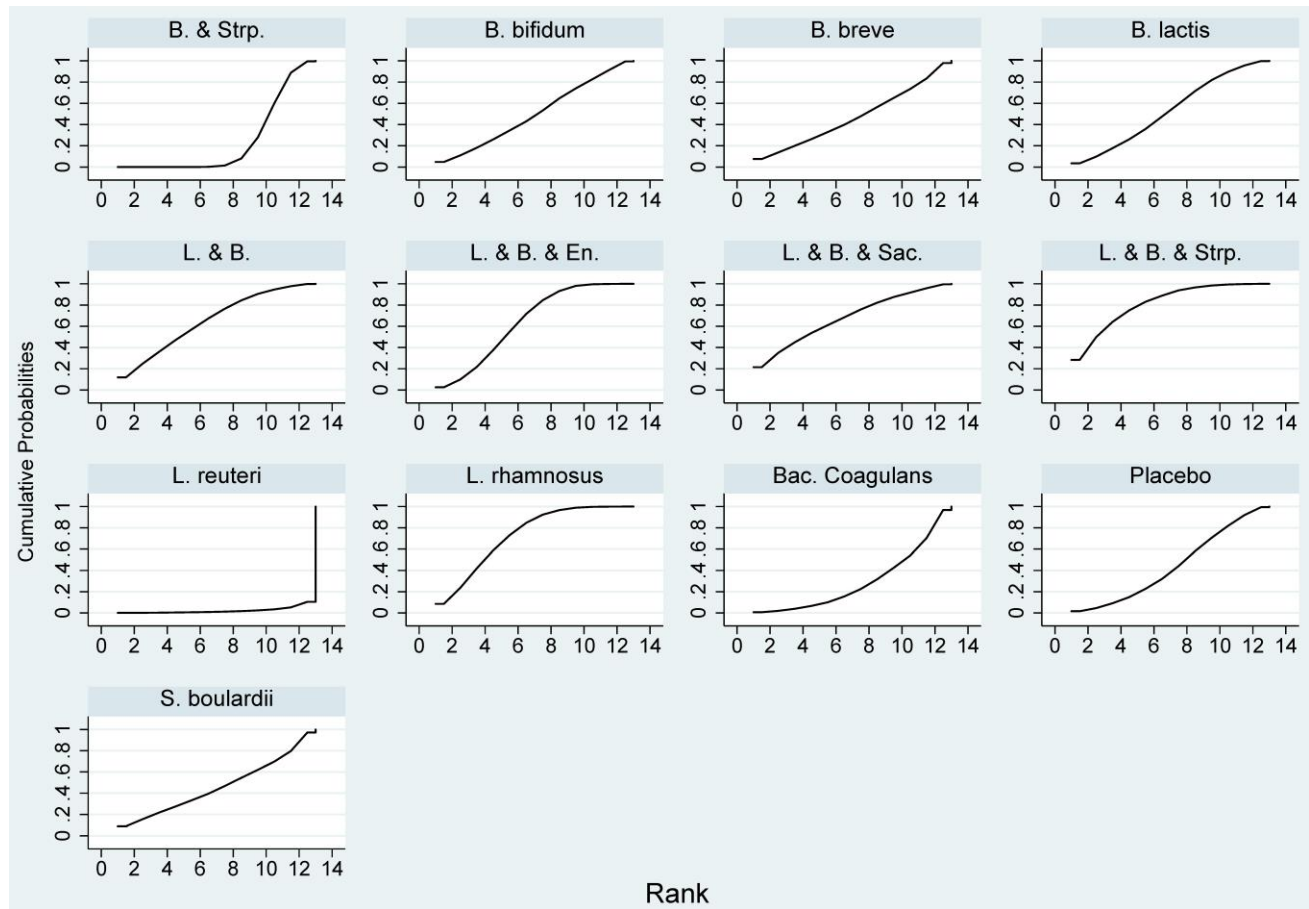

*Bac. coagulans*: *Bacillus coagulans*; *B. & Strp.*: *Bifidobacterium* spp. & *Streptococcus salivarius* subsp. *thermophilus*; *B. bifidum*: *Bifidobacterium bifidum*; *B. breve*: *Bifidobacterium breve*; *L. & B.*: *Lactobacillus* spp. & *Bifidobacterium* spp.; *L. reuteri*: *Lactobacillus reuteri*; *L. & B. & Sac.*: *Lactobacillus* spp. & *Bifidobacterium* spp. & *Saccharomyces boulardii*; *L. & B. & Strp.*: *Lactobacillus* spp. & *Bifidobacterium* spp. & *S. salivarius* subsp. *thermophilus*; *L. rhamnosus*: *Lactobacillus rhamnosus*; *S. boulardii*: *Saccharomyces boulardii*

**e-Figure 15: Plots of the surface under the cumulative ranking curves for all treatments for the 'duration of hospitalization' outcome**

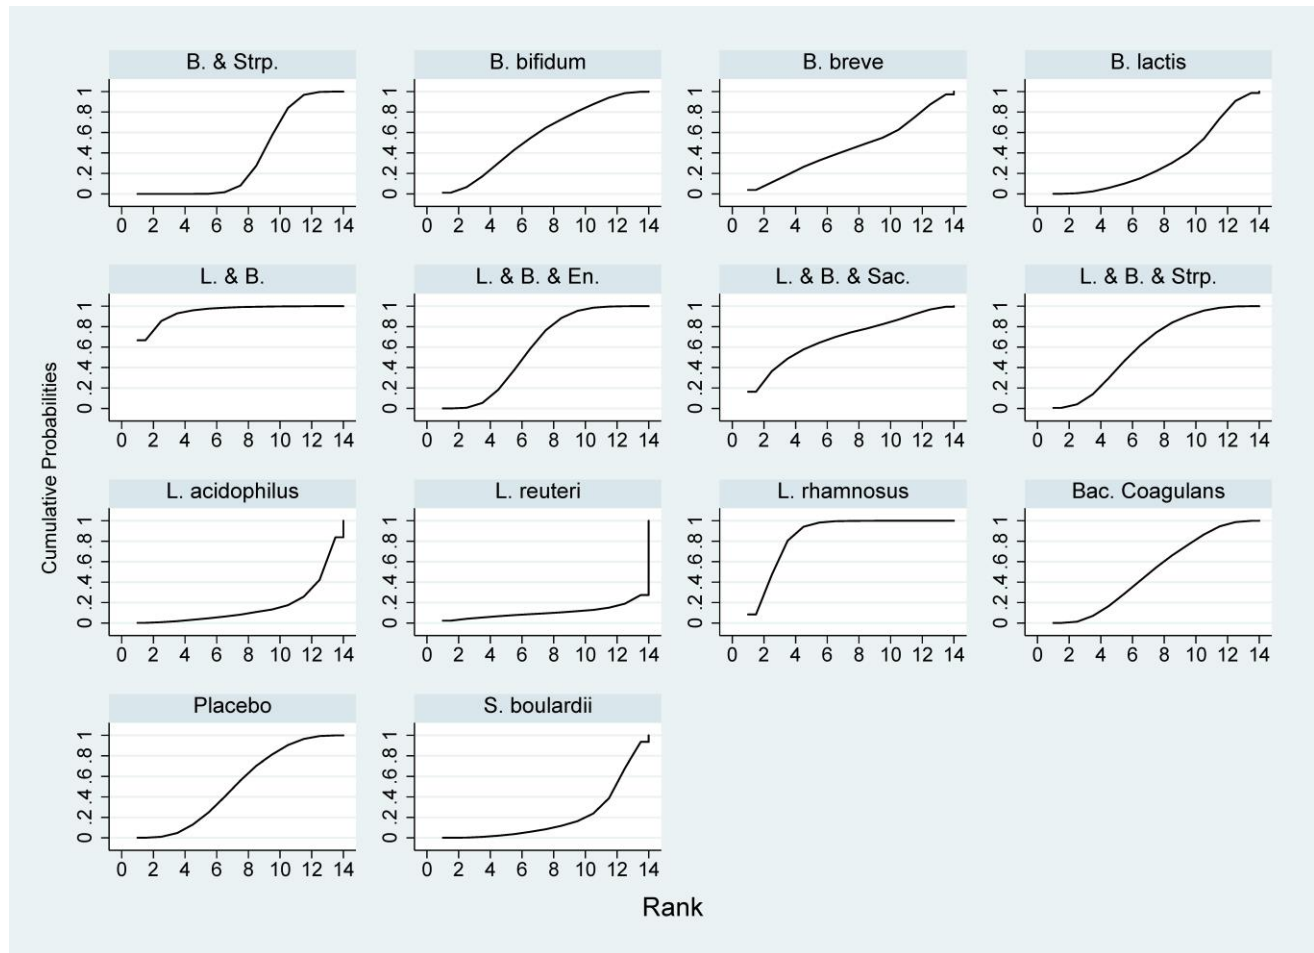

*Bac. coagulans*: *Bacillus coagulans*; *B. & Strp.*: *Bifidobacterium* spp. & *Streptococcus salivarius* subsp. *thermophilus*; *B. bifidum*: *Bifidobacterium bifidum*; *B. lactis*: *Bifidobacterium animalis* subsp. *lactis*; *B. breve*: *Bifidobacterium breve*; *L. & B.*: *Lactobacillus* spp. & *Bifidobacterium* spp.; *L. & B. & En.*: *Lactobacillus* spp. & *Bifidobacterium* spp. & *Enterococcus* spp.; *L. acidophilus*: *Lactobacillus acidophilus*; *L. reuteri*: *Lactobacillus reuteri*; *L. & B. & Sac.*: *Lactobacillus* spp. & *Bifidobacterium* spp. & *Saccharomyces boulardii*; *L. & B. & Strp.*: *Lactobacillus* spp. & *Bifidobacterium* spp. & *S. salivarius* subsp. *thermophilus*; *L. rhamnosus*: *Lactobacillus rhamnosus*; *S. boulardii*: *Saccharomyces boulardii*

## Appendix 11: GRADE presentation of continuous outcomes

Network meta-analysis results (mean difference [MD] and 95% CIs) sorted based on GRADE certainty of evidence (CoE) for the comparisons of active treatments vs. placebo (PLC) for time to reach full enteral feeding (days) and duration of hospitalization (days)

| Outcome                                   | CoE                        | Classification                   | Intervention                                                                                              | MD (95% CI) vs PLC           |
|-------------------------------------------|----------------------------|----------------------------------|-----------------------------------------------------------------------------------------------------------|------------------------------|
| Time to Reach Full Enteral Feeding (days) | High<br>(Moderate to High) | Among the most effective         | <i>Lactobacillus</i> spp. & <i>Bifidobacterium</i> spp. & <i>S. boulardii</i>                             | <b>-3.30 (-5.91,-0.69)</b>   |
|                                           |                            | Among the least effective        | <i>S. boulardii</i>                                                                                       | -1.02 (-3.64,1.61)           |
|                                           |                            |                                  | <i>Lactobacillus</i> spp. & <i>Bifidobacterium</i> spp. & <i>S. salivarius</i> subsp. <i>thermophilus</i> | 5.75 (-0.33,11.83)           |
|                                           | Low<br>(Low to very low)   | May be among the most effective  | <i>L. reuteri</i>                                                                                         | <b>-2.62 (-4.53,-0.71)</b>   |
|                                           |                            | May be among the least effective | <i>Lactobacillus</i> spp. & <i>Bifidobacterium</i> spp.                                                   | <b>-2.15 (-3.78,-0.51)</b>   |
|                                           |                            |                                  | <i>Lactobacillus</i> spp. & <i>Bifidobacterium</i> spp. & <i>Enterococcus</i> spp.                        | -2.57 (-6.55, 1.41)          |
|                                           |                            |                                  | <i>B. animalis</i> subsp. <i>lactis</i>                                                                   | -2.30 (-5.35, 0.74)          |
|                                           |                            |                                  | <i>B. breve</i>                                                                                           | -1.53 (-4.30,1.24)           |
|                                           |                            |                                  | <i>Bifidobacterium</i> spp. & <i>S. salivarius</i> subsp. <i>thermophilus</i>                             | -1.35 (-4.66,1.95)           |
|                                           |                            |                                  | <i>B. bifidum</i>                                                                                         | -1.10 (-5.31,3.11)           |
|                                           | <i>Bacillus coagulans</i>  | -1.00 (-5.78,3.78)               |                                                                                                           |                              |
|                                           | <i>L. rhamnosus</i>        | 0.02 (-3.29,3.32)                |                                                                                                           |                              |
| Duration of Hospitalization (days)        | High<br>(Moderate to High) | Among the most effective         | <i>B. animalis</i> subsp. <i>lactis</i>                                                                   | <b>-13.00 (-22.71,-3.29)</b> |
|                                           |                            | Among the least effective        | <i>L. reuteri</i>                                                                                         | <b>-7.89 (-11.60,-4.17)</b>  |
|                                           |                            |                                  | <i>Bifidobacterium</i> spp. & <i>S. salivarius</i> subsp. <i>thermophilus</i>                             | -2.75 (-10.00,4.50)          |
|                                           |                            |                                  | <i>L. rhamnosus</i>                                                                                       | -1.85 (-7.62,3.91)           |
|                                           | Low<br>(Low to very low)   | May be among the least effective | <i>Lactobacillus</i> spp. & <i>Bifidobacterium</i> spp. & <i>S. salivarius</i> subsp. <i>thermophilus</i> | 7.25 (-5.83,20.33)           |
|                                           |                            |                                  | <i>B. breve</i>                                                                                           | 1.18 (-5.88,8.24)            |
|                                           |                            |                                  | <i>Lactobacillus</i> spp. & <i>Bifidobacterium</i> spp. & <i>Enterococcus</i> spp.                        | -6.00 (-19.53,7.53)          |
|                                           |                            |                                  | <i>Lactobacillus</i> spp. & <i>Bifidobacterium</i> spp. & <i>S. boulardii</i>                             | -3.20 (-8.38,1.98)           |
|                                           |                            |                                  | <i>Lactobacillus</i> spp. & <i>Bifidobacterium</i> spp.                                                   | -2.84 (-6.21,0.54)           |
|                                           |                            |                                  | <i>S. boulardii</i>                                                                                       | -1.86 (-6.65,2.92)           |
| <i>B. bifidum</i>                         | -0.60 (-13.61,12.41)       |                                  |                                                                                                           |                              |
| <i>Bacillus coagulans</i>                 | 4.50 (-4.33,13.33)         |                                  |                                                                                                           |                              |
| <i>L. acidophilus</i>                     | 20.70 (-12.55,53.95)       |                                  |                                                                                                           |                              |
